# Supplementary material for: A facile synthesis of isoxazolo[3,4-a]pyrrolizine and isoxazolo[4,3-c]pyridine derivatives via intramolecular nitrone cycloaddition reaction
Source: Royal Society of Chemistry journal article supplement (doi:10.1039/c5ra10371a), 2015-01-01

## Supporting Information

# A Facile Synthesis of Isoxazolo[3,4-a]pyrrolizine and Isoxazolo[4,3-c]pyridine Derivatives via Intramolecular Nitrone Cycloaddition Reaction

Manickam Bakthadoss,<sup>a,b\*</sup> and Jayakumar Srinivasan<sup>b</sup>

<sup>a</sup>*Department of Chemistry, Pondicherry University, Pondicherry – 605 014, India.*

<sup>b</sup>*Department of Organic Chemistry, University of Madras, Guindy Campus, Chennai-600025, Tamil Nadu, India.*

| <b>Contents</b>                                                                                                                                                | <b>page</b>  |
|----------------------------------------------------------------------------------------------------------------------------------------------------------------|--------------|
| 1) Experimental section                                                                                                                                        | <b>2-10</b>  |
| 2) <sup>1</sup> H and <sup>13</sup> C NMR spectra for compounds ( <b>3a</b> , <b>3h</b> , <b>3l</b> , <b>6a-l</b> , <b>11a</b> , <b>12a</b> and <b>13a-f</b> ) | <b>11-44</b> |

## EXPERIMENTAL SECTION

**General Remarks:** Melting points were recorded on a Superfit (India) capillary melting point apparatus and were uncorrected. IR spectra were recorded on a Bruker-FT-IR spectrometer using solid samples as KBr plates. For compounds (**3a**, **3h**, **3l**, **6a-l**, **11a**, **12a** and **13a-f**) spectra were recorded  $^1\text{H}$  NMR (300 MHz and 400 MHz) and  $^{13}\text{C}$  NMR (75 MHz and 100 MHz) in deuteriochloroform ( $\text{CDCl}_3$ ) on a Bruker 300 MHz and 400 MHz spectrometer using tetramethylsilane (TMS,  $\delta = 0$ ) as an internal standard at room temperature. Mass spectra were recorded on Agilent 1200 LC/MS-6110 mass spectrometer.

### Typical experimental procedure for the synthesis of methyl (*E*)-2-((2-formyl-1*H*-pyrrol-1-yl)methyl)-3-phenylacrylate (**3a**)

A solution of pyrrole-2-carboxaldehyde (**2**) (0.48 g, 4 mmol) and potassium carbonate (1.12 g, 8 mmol) in acetonitrile solvent was stirred for 15 minutes at room temperature. To this solution, methyl 2-(acetoxymethyl)acrylate (**1a**) (1.44 g, 4.8 mmol) was added drop wise till the addition is complete. After the completion of reaction (checked with TLC), acetonitrile was evaporated. The crude mass was added EtOAc (15mL) and water (15 mL). This organic layer was extracted and washed with water ( $2 \times 10$  mL), and brine solution ( $2 \times 10$  mL). The organic layer was dried over anhydrous sodium sulphate. Removal of solvent led to the crude product which was purified through pad of silica gel (100-200 mesh) using ethylacetate and hexanes (1:9) solvent. The pure product was obtained as colourless solid (**3a**).

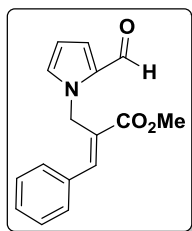

Yield (%): 96%; m.p.: 112-114 °C; IR (KBr):  $\nu$  2188, 1363, 1344  $\text{cm}^{-1}$ ;  $^1\text{H}$  NMR (300 MHz,  $\text{CDCl}_3$ ):  $\delta$  3.77 (s, 3H), 5.47 (s, 2H), 6.20 (t, 1H,  $J = 2.7$  Hz), 6.95 – 7.36 (m, 7H), 8.07 (s, 1H), 9.58 (s, 1H);  $^{13}\text{C}$  NMR (75 MHz,  $\text{CDCl}_3$ ):  $\delta$  45.1, 52.4, 109.9, 124.7, 126.6, 128.8, 129.0, 129.1, 129.7, 131.8, 133.9, 145.1, 167.3, 179.5; MS ( $m/z$ ): 269  $[\text{M}]^+$ ; Calculated for  $\text{C}_{16}\text{H}_{15}\text{NO}_3$ : C, 71.36; H, 5.61; N, 5.20. Found: C, 71.29; H, 5.55; N, 5.26.

### Methyl (*E*)-3-(4-chlorophenyl)-2-((2-formyl-1*H*-pyrrol-1-yl)methyl)acrylate (**3h**)

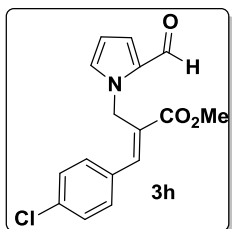

Yield (%): 87%; m.p.: 116-118 °C; IR (KBr):  $\nu$  2179, 1368, 1356  $\text{cm}^{-1}$ ;  $^1\text{H}$  NMR (400 MHz,  $\text{CDCl}_3$ ):  $\delta$  3.78 (s, 3H), 5.44 (s, 2H), 6.21 (dd, 1H,  $J_1 = 2.4$  Hz,  $J_2 = 3.6$  Hz), 6.91 (s, 1H), 6.96 (dd, 1H,  $J_1 = 1.6$  Hz,  $J_2 = 4$  Hz), 7.18 (d, 2H,  $J = 8.8$  Hz), 7.33 (d, 2H,  $J = 8.4$  Hz), 7.99 (s, 1H), 9.56 (s, 1H);  $^{13}\text{C}$  NMR (100 MHz,  $\text{CDCl}_3$ ):  $\delta$  45.1, 52.6, 110.1, 125.0, 127.2, 129.2, 129.3, 130.5, 131.8, 132.4, 135.9, 143.8, 167.2, 179.7; DEPT 135 (100 MHz,  $\text{CDCl}_3$ ): 45.3, 52.5, 110.0, 124.9, 129.0, 129.1, 130.4, 143.7, 179.5; MS (m/z): 303  $[\text{M}]^+$ ; Calculated for  $\text{C}_{16}\text{H}_{14}\text{ClNO}_3$ : C, 63.27; H, 4.65; N, 4.61; Found: 63.27; H, 4.65; N, 4.61.

### Methyl (*E*)-2-((4-bromo-2-formyl-1*H*-pyrrol-1-yl)methyl)-3-(4-chlorophenyl)acrylate (**3l**)

To a stirred solution of methyl (*E*)-3-(4-chlorophenyl)-2-((2-formyl-1*H*-pyrrol-1-yl)methyl)acrylate **3h** (300 mg, 0.99 mmol) in THF (5 mL) at 0 °C was added *N*-bromosuccinimide (174 mg, 0.99 mmol) as a single portion. The reaction mixture was stirred for 1 h at 0 °C. After the completion of reaction (monitored by TLC), THF was evaporated *in vacuo*. The crude mass was added EtOAc (15 mL) and water (15 mL). This organic layer was extracted and washed with water ( $2 \times 10$  mL), and brine solution ( $2 \times 10$  mL). The organic layer was dried over anhydrous sodium sulphate. The organic layer was concentrated led to the crude product and was recrystallized from ethanol afforded the desired methyl (*E*)-2-((4-bromo-2-formyl-1*H*-pyrrol-1-yl)methyl)-3-(4-chlorophenyl)acrylate as a pale yellow solid.

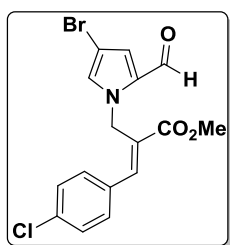

Yield (%): 82%; m.p.: 126-128 °C; IR (KBr):  $\nu$  2189, 1372, 1355  $\text{cm}^{-1}$ ;  $^1\text{H}$  NMR (400 MHz,  $\text{CDCl}_3$ ):  $\delta$  3.80 (s, 3H), 5.41 (s, 2H), 6.87 (s, 1H), 6.93 (d, 1H,  $J = 1.6$  Hz), 7.17 (d, 2H,  $J = 8.4$  Hz), 7.35 (d, 2H,  $J = 8.8$  Hz), 8.01 (s, 1H); 9.49 (s, 1H);  $^{13}\text{C}$  NMR (100 MHz,  $\text{CDCl}_3$ ):  $\delta$  45.4, 52.7, 97.4, 125.5, 126.7, 128.6, 129.3, 130.5, 132.0, 132.2, 136.2, 144.4, 166.9, 179.2; DEPT 135 (100 MHz,  $\text{CDCl}_3$ ): 45.2, 52.6, 125.4, 128.4, 129.2, 130.3, 144.2, 179.0; MS (m/z): 381

[M]<sup>+</sup>; Calculated for C<sub>16</sub>H<sub>13</sub>BrClNO<sub>3</sub>: C, 50.22; H, 3.42; N, 3.66. Found: C, 50.25; H, 3.38; N, 3.72.

**Typical experimental procedure for the synthesis of methyl 1,3-diphenyl-3,3a,4,8b-tetrahydro-1*H*-isoxazolo[3,4-*a*]pyrrolizine-3a-carboxylate (6a)**

A mixture of (*Z*)-methyl 2-((2-formyl-1*H*-pyrrol-1-yl)methyl)-3-phenylacrylate (**3a**) (0.56 g, 2 mmol) and *N*-phenylhydroxylamine **4a** (0.33 g, 3 mmol) with 4 Å MS in ethanol (10 mL) was refluxed for 6 h. After the completion of the reaction as indicated by TLC, the reaction mixture was concentrated and the resulting crude mass was diluted with water (15 mL) and extracted with ethyl acetate (3 × 15 mL). The combined organic layer was washed with brine (3 × 15 mL) and dried over anhydrous Na<sub>2</sub>SO<sub>4</sub>, the organic layer was concentrated and purified by column chromatography using ethyl acetate-hexane (1:9) to afford the pure methyl 1,3-diphenyl-3,3a,4,8b-tetrahydro-1*H*-isoxazolo[3,4-*a*]pyrrolizine-3a-carboxylate **6a**.

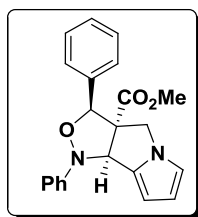

Yield (%): 80%; mp.: 164-166 °C; IR (KBr):  $\nu$  1732, 1582, 1353 cm<sup>-1</sup>; <sup>1</sup>H NMR (300 MHz, CDCl<sub>3</sub>):  $\delta$  3.74 – 3.79 (m, 4H), 4.12 (d, 1H, *J* = 11.7 Hz), 5.69 (s, 1H), 5.83 (s, 1H), 5.92 (d, 1H, *J* = 3 Hz), 6.23 - 7.36 (m, 12H); <sup>13</sup>C NMR (75 MHz, CDCl<sub>3</sub>):  $\delta$  49.5, 53.1, 72.1, 72.7, 84.5, 101.7, 114.0, 114.3, 115.0, 115.1, 118.5, 122.3, 126.8, 128.6, 128.7, 129.0, 129.2, 133.3, 134.6, 148.8, 172.1; MS (m/z): 360 [M]<sup>+</sup>; Calculated for C<sub>22</sub>H<sub>20</sub>N<sub>2</sub>O<sub>3</sub>: C, 73.32; H, 5.59; N, 7.77. Found: C, 73.30; H, 5.56; N, 7.81.

**Methyl 3-(naphthalen-1-yl)-1-phenyl-3,3a,4,8b-tetrahydro-1*H*-isoxazolo[3,4-*a*]pyrrolizine-3a-carboxylate (6b)**

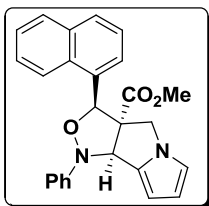



Yield (%): 75%; mp.: 165-167 °C; IR (KBr):  $\nu$  1735, 1588, 1343  $\text{cm}^{-1}$ ;  $^1\text{H}$  NMR (300 MHz,  $\text{CDCl}_3$ ):  $\delta$  3.55 (d, 1H,  $J = 11.4$  Hz), 3.69 (s, 3H), 4.16 (d, 1H,  $J = 11.7$  Hz), 5.95 (s, 1H), 5.99 (d, 1H,  $J = 3$  Hz), 6.28 (dd,  $J_1 = 11.7$  Hz,  $J_2 = 14.7$  Hz, 2H), 6.58 (s, 1H), 7.03 – 7.91 (m, 13H);  $^{13}\text{C}$  NMR (75 MHz,  $\text{CDCl}_3$ ):  $\delta$  49.3, 53.1, 71.7, 74.2, 81.9, 101.7, 114.0, 114.3, 115.1, 122.5, 122.8, 125.4, 125.5, 125.8, 126.6, 129.0, 129.2, 130.5, 130.9, 132.9, 133.9, 133.6, 148.9, 172.2. MS (m/z): 410  $[\text{M}]^+$ ; Calculated for  $\text{C}_{26}\text{H}_{22}\text{N}_2\text{O}_3$ : C, 76.08; H, 5.40; N, 6.82. Found: C, 76.06; H, 5.43; N, 6.85.

**Methyl 1-phenyl-3-o-tolyl-3,3a,4,8b-tetrahydro-1H-isoxazolo[3,4-a]pyrrolizine-3a-carboxylate (6c)**

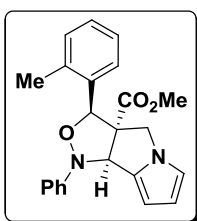

Yield (%): 80%; mp.: 161-163 °C; IR (KBr):  $\nu$  1715, 1597, 1345  $\text{cm}^{-1}$ ;  $^1\text{H}$  NMR (300 MHz,  $\text{CDCl}_3$ ):  $\delta$  2.21 (s, 3H), 3.66 – 3.72 (m, 4H), 4.26 (d, 1H,  $J = 11.7$  Hz), 5.86 (s, 1H), 5.89 (d, 1H,  $J = 3.3$  Hz), 5.95 (s, 1H), 6.25 – 7.36 (m, 11H);  $^{13}\text{C}$  NMR (75 MHz,  $\text{CDCl}_3$ ):  $\delta$  19.3, 49.1, 52.9, 71.2, 73.6, 82.5, 101.7, 113.9, 114.3, 115.1, 122.2, 126.1, 127.3, 128.5, 128.9, 130.7, 132.8, 133.0, 135.8, 148.8, 172.3; MS (m/z): 374  $[\text{M}]^+$ ; Calculated for  $\text{C}_{23}\text{H}_{22}\text{N}_2\text{O}_3$ : C, 73.78; H, 5.92; N, 7.48; Found: C, 73.72; H, 5.89; N, 7.52.

**Methyl 1-phenyl-3-p-tolyl-3,3a,4,8b-tetrahydro-1H-isoxazolo[3,4-a]pyrrolizine-3a-carboxylate (6d)**

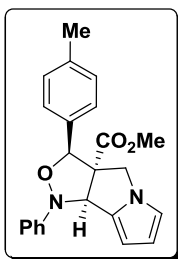

Yield (%): 81%; mp.: 164-166 °C; IR (KBr):  $\nu$  1734, 1584, 1338  $\text{cm}^{-1}$ ;  $^1\text{H}$  NMR (300 MHz,  $\text{CDCl}_3$ ):  $\delta$  2.36 (s, 3H), 3.73 (s, 3H), 3.79 (d, 1H,  $J = 11.7$  Hz), 4.12 (d, 1H,  $J = 11.4$  Hz), 5.65 (s, 1H), 5.83 (s, 1H), 5.91 (d, 1H,  $J = 3$  Hz), 6.26 (t, 1H,  $J = 3$  Hz), 6.45 (s, 1H), 7.08 – 7.36 (m, 9H);  $^{13}\text{C}$  NMR (75 MHz,  $\text{CDCl}_3$ ):  $\delta$  21.2, 49.5, 53.0, 72.1, 72.7, 84.6, 101.6, 114.0, 114.3, 115.0,

122.2, 126.7, 129.0, 129.3, 131.5, 133.3, 138.5, 148.9, 172.2; MS (m/z): 374 [M]<sup>+</sup>; Calculated for C<sub>23</sub>H<sub>22</sub>N<sub>2</sub>O<sub>3</sub>: C, 73.78; H, 5.92; N, 7.48; Found: C, 73.81; H, 5.96; N, 7.50.

**Methyl 3-(4-isopropylphenyl)-1-phenyl-3,3a,4,8b-tetrahydro-1H-isoxazolo[3,4-a]pyrrolizine-3a-carboxylate (6e)**

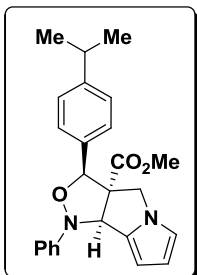

Yield (%): 77%; mp.: 169-171 °C; IR (KBr):  $\nu$  1739, 1594, 1323 cm<sup>-1</sup>; <sup>1</sup>H NMR (300 MHz, CDCl<sub>3</sub>):  $\delta$  1.26 (d, 6H, *J* = 6.9 Hz), 2.92 (sep, 1H, *J* = 11.4 Hz), 3.73 (s, 1H), 3.84 (d, 1H, *J* = 11.4 Hz), 4.12 (d, 1H, *J* = 11.4 Hz), 5.64 (s, 1H), 5.82 (s, 1H), 5.92 – 7.35 (m, 12 H); <sup>13</sup>C NMR (75 MHz, CDCl<sub>3</sub>):  $\delta$  23.8, 23.9, 33.9, 49.5, 53.0, 72.2, 72.7, 84.6, 101.6, 114.0, 114.3, 115.0, 122.2, 126.7, 126.8, 129.0, 131.8, 133.4, 149.0, 149.5, 172.2; MS (m/z): 402 [M]<sup>+</sup>; Calculated for C<sub>25</sub>H<sub>26</sub>N<sub>2</sub>O<sub>3</sub>: C, 74.60; H, 6.51; N, 6.96; Found: C, 74.64; H, 6.55; N, 6.99.

**Methyl 3-(2-chlorophenyl)-1-phenyl-3,3a,4,8b-tetrahydro-1H-isoxazolo[3,4-a]pyrrolizine-3a-carboxylate (6f)**

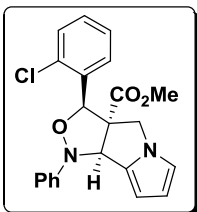

Yield (%): 76%; mp.: 170-172 °C; IR (KBr):  $\nu$  1739, 1529, 1363 cm<sup>-1</sup>; <sup>1</sup>H NMR (300 MHz, CDCl<sub>3</sub>):  $\delta$  3.63 – 3.66 (m, 4H), 4.43 (d, 1H, *J* = 11.4 Hz), 5.76 (s, 1H), 5.92 (s, 1H), 6.12 - 7.41 (m, 12H); <sup>13</sup>C NMR (75 MHz, CDCl<sub>3</sub>):  $\delta$  48.7, 53.0, 71.3, 74.2, 82.6, 101.8, 113.9, 114.4, 115.0, 122.4, 127.1, 128.6, 128.9, 129.5, 129.8, 132.6, 132.7, 133.2, 148.9, 171.7; MS (m/z): 394 [M]<sup>+</sup>; Calculated for C<sub>22</sub>H<sub>19</sub>ClN<sub>2</sub>O<sub>3</sub>: C, 66.92; H, 4.85; N, 7.09; Found: C, 66.88; H, 4.81; N, 7.14.

**Methyl 3-(3-chlorophenyl)-1-phenyl-3,3a,4,8b-tetrahydro-1H-isoxazolo[3,4-a]pyrrolizine-3a-carboxylate (6g)**

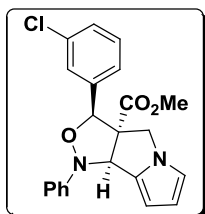

Yield (%): 86%; mp.: 161-163 °C; IR (KBr):  $\nu$  1724, 1588, 1353  $\text{cm}^{-1}$ ;  $^1\text{H}$  NMR (300 MHz,  $\text{CDCl}_3$ ):  $\delta$  3.69 – 3.73 (m, 4H), 4.11 (d, 1H,  $J = 11.4$  Hz), 5.67 (s, 1H), 5.84 (s, 1H), 5.91 (d, 1H,  $J = 3.3$  Hz), 6.26 (t, 1H,  $J = 3$  Hz), 6.44 (t, 1H,  $J = 3$  Hz), 7.00 – 7.36 (m, 9H);  $^{13}\text{C}$  NMR (75 MHz,  $\text{CDCl}_3$ ):  $\delta$  49.6, 53.2, 71.9, 72.6, 83.6, 101.9, 114.2, 114.3, 115.1, 122.5, 124.9, 127.0, 128.9, 129.0, 129.9, 133.0, 134.7, 136.8, 148.6, 171.9; MS (m/z): 394  $[\text{M}]^+$ ; Calculated for  $\text{C}_{22}\text{H}_{19}\text{ClN}_2\text{O}_3$ : C, 66.92; H, 4.85; N, 7.09; Found: C, 66.94; H, 4.82; N, 7.12.

**Methyl 3-(4-chlorophenyl)-1-phenyl-3,3a,4,8b-tetrahydro-1H-isoxazolo[3,4-a]pyrrolizine-3a-carboxylate (6h)**

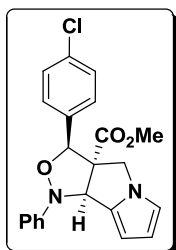

Yield (%): 78%; mp.: 163-165 °C; IR (KBr):  $\nu$  1736, 1584, 1352  $\text{cm}^{-1}$ ;  $^1\text{H}$  NMR (300 MHz,  $\text{CDCl}_3$ ):  $\delta$  3.66 – 3.72 (m, 4H), 4.08 (d,  $J = 11.4$  Hz, 1H), 5.66 (s, 1H), 5.85 (s, 1H), 5.89 (d,  $J = 3.3$  Hz, 1H), 6.25 (t,  $J = 3$  Hz, 1H), 6.42 (t,  $J = 0.9$  Hz, 1H), 7.00 – 7.35 (m, 9H);  $^{13}\text{C}$  NMR (75 MHz,  $\text{CDCl}_3$ ):  $\delta$  49.6, 53.1, 71.8, 72.5, 83.8, 101.9, 114.2, 114.3, 115.1, 122.5, 128.3, 128.8, 129.0, 133.1, 133.2, 134.6, 148.6, 171.9; MS (m/z): 394  $[\text{M}]^+$ ; Calculated for  $\text{C}_{22}\text{H}_{19}\text{ClN}_2\text{O}_3$ : C, 66.92; H, 4.85; N, 7.09; Found: C, 66.95; H, 4.82; N, 7.13.

**Methyl 3-(2-methoxyphenyl)-1-phenyl-3,3a,4,8b-tetrahydro-1H-isoxazolo[3,4-a]pyrrolizine-3a-carboxylate (6i)**

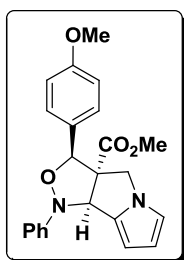

Yield (%) : 72%; mp.: 167-169 °C; IR (KBr):  $\nu$  2238, 1543, 1314  $\text{cm}^{-1}$ ;  $^1\text{H}$  NMR (300 MHz,  $\text{CDCl}_3$ ):  $\delta$  3.68 – 3.75 (m, 7H), 4.47 (d, 1H,  $J = 11.7$  Hz), 5.66 (s, 1H), 5.89 (s, 1H), 5.92 (d, 1H,  $J = 3.3$  Hz), 6.23 (t, 1H,  $J = 3$  Hz), 6.44 (s, 1H), 6.86 – 7.48 (m, 9H);  $^{13}\text{C}$  NMR (75 MHz,  $\text{CDCl}_3$ )  $\delta$  48.1, 52.7, 55.0, 71.9, 74.6, 82.1, 101.3, 109.9, 113.8, 114.5, 114.7, 120.9, 121.9, 123.6, 127.2, 128.9, 129.4, 133.0, 149.4, 155.6, 172.3; MS (m/z): 390  $[\text{M}]^+$ ; Calculated for  $\text{C}_{23}\text{H}_{22}\text{N}_2\text{O}_4$ : C, 70.75; H, 5.68; N, 7.17; Found: C, 70.72; H, 5.65; N, 7.21.

**Methyl 3-(benzo[d][1,3]dioxol-4-yl)-1-phenyl-3,3a,4,8b-tetrahydro-1*H*-isoxazolo[3,4-*a*]pyrrolizine-3*a*-carboxylate (6j)**

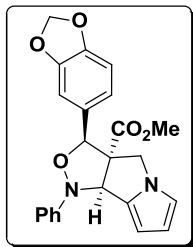

Yield (%): 76%; mp.: 164-166 °C; IR (KBr):  $\nu$  1735, 1588, 1343  $\text{cm}^{-1}$ ;  $^1\text{H}$  NMR (300 MHz,  $\text{CDCl}_3$ ):  $\delta$  3.72 – 3.84 (m, 4H), 4.11 (d, 1H,  $J = 11.1$  Hz), 5.60 (s, 1H), 5.83 – 7.33 (m, 14H).  $^{13}\text{C}$  NMR (75 MHz,  $\text{CDCl}_3$ ):  $\delta$  49.5, 53.0, 71.9, 72.5, 84.4, 101.2, 101.7, 107.37, 108.4, 114.1, 114.3, 115.1, 120.5, 122.3, 128.2, 129.0, 133.2, 147.9, 148.8, 172.1; MS ( $m/z$ ): 404.  $[\text{M}]^+$ ; Calculated for  $\text{C}_{23}\text{H}_{20}\text{N}_2\text{O}_5$ : C, 68.31; H, 4.98; N, 6.93; Found: C, 68.29; H, 4.94; N, 6.97.

**Butyl 1,3-diphenyl-3,3a,4,8b-tetrahydro-1*H*-isoxazolo[3,4-*a*]pyrrolizine-3*a*-carboxylate (6k)**

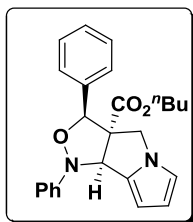

Yield (%): 79%; mp.: 161-163 °C; IR (KBr):  $\nu$  1732, 1579, 1324  $\text{cm}^{-1}$ ;  $^1\text{H}$  NMR (300 MHz,  $\text{CDCl}_3$ ):  $\delta$  0.88 (t, 3H,  $J = 7.2$  Hz), 1.18 – 1.25 (m, 2H), 1.45 – 1.50 (m, 2H), 3.73 (d, 1H,  $J = 11.7$  Hz), 4.08 – 4.15 (m, 3H), 5.70 (s, 1H), 5.85 (s, 1H), 5.95 – 7.37 (m, 13H);  $^{13}\text{C}$  NMR (75 MHz,  $\text{CDCl}_3$ ):  $\delta$  13.6, 19.1, 30.3, 49.5, 66.1, 72.4, 73.0, 84.7, 101.5, 114.1, 114.2, 114.9, 122.3, 126.8, 128.6, 128.6, 129.0, 133.4, 134.7, 149.0, 171.7; MS ( $m/z$ ): 402  $[\text{M}]^+$ ; Calculated for  $\text{C}_{25}\text{H}_{26}\text{N}_2\text{O}_3$ : C, 74.60; H, 6.51; N, 6.96; Found: C, 74.60; H, 6.51; N, 6.96.

**Methyl -7-bromo-3-(4-chlorophenyl)-1-phenyl-1,8b-dihydro-3*H*-isoxazolo[3,4-*a*]pyrrolizine-3*a*(4*H*)-carboxylate (6l)**

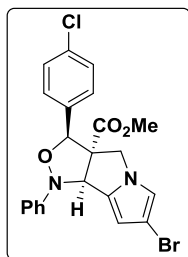

Yield (%): 69%; mp.: 154-156 °C; IR (KBr):  $\nu$  1738, 1575, 1328  $\text{cm}^{-1}$ ;  $^1\text{H}$  NMR (400 MHz,  $\text{CDCl}_3$ ):  $\delta$  3.69 (d, 1H,  $J = 11.6$  Hz), 3.75 (s, 3H), 4.06 (d, 1H,  $J = 11.6$  Hz), 5.65 (s, 1H), 5.83 (s, 1H), 5.91 (t, 1H,  $J = 0.08$  Hz), 6.46 (d, 1H,  $J = 1.2$  Hz), 7.15 – 7.36 (m, 9H);  $^{13}\text{C}$  NMR (100 MHz,  $\text{CDCl}_3$ ):  $\delta$  49.8, 53.4, 72.1, 72.8, 83.8, 102.1, 114.4, 114.5, 115.3, 122.7, 125.1, 129.1, 129.2, 130.1, 134.9, 136.9, 148.7, 172.07; MS (m/z): 472  $[\text{M}]^+$ ; Calculated for  $\text{C}_{22}\text{H}_{18}\text{BrClN}_2\text{O}_3$ : C, 55.78; H, 3.83; N, 5.91; Found: C, 55.74; H, 3.76; N, 5.95.

**Methyl (E)-2-(((N-((E)-2-formyl-3-phenylallyl)-4-methylphenyl)sulfonamido)methyl)-3-phenylacrylate (11a)**

To a stirred solution of methyl (E)-2-(((N-((E)-2-(hydroxymethyl)-3-phenylallyl)-4-methylphenyl)sulfonamido)methyl)-3-phenylacrylate **10a** (2.0 g, 4 mmol) in dry DCE (10 mL) at room temperature was added activated  $\text{MnO}_2$  (0.83 g, 10.18 mmol) and the reaction was continued at reflux temperature for 3 h. After completion of the reaction as monitored by TLC, the reaction mixture was diluted with DCE and filtered through Celite. The filtrate was evaporated to afford the crude product and further purification by column chromatography over silica gel (60-120 mesh) using EtOAc/hexanes as the eluent furnished (Z)-methyl 2-((N-((E)-2-formyl-3-phenylallyl)-4-methyl phenylsulfonamido)methyl)-3-phenylacrylate **11a** as Colourless solid.

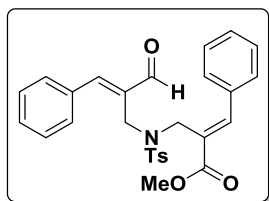

Yield (%): 72%; m.p.: 145-147 °C; IR (KBr):  $\nu$  2238, 1543, 1314  $\text{cm}^{-1}$ ;  $^1\text{H}$  NMR (300 MHz,  $\text{CDCl}_3$ ):  $\delta$  2.39 (s, 3H), 3.52 (s, 3H), 4.07 (s, 2H), 4.09 (s, 2H), 7.11 – 7.69 (m, 16H), 9.45 (s, 1H);  $^{13}\text{C}$  NMR (75 MHz,  $\text{CDCl}_3$ ):  $\delta$  21.5, 43.7, 45.6, 51.9, 128.1, 128.5, 128.8, 129.2, 129.5, 129.7, 130.5, 130.9, 133.2, 133.7, 134.5, 135.5, 141.9, 143.6, 153.8, 167.7, 194.3; MS (m/z) : 489  $[\text{M}]^+$ ; Calculated for  $\text{C}_{28}\text{H}_{27}\text{NO}_5\text{S}$ : C, 68.69; H, 5.56; N, 2.86; Found: C, 68.62; H, 5.51; N, 2.94.

**Typical experimental procedure for the synthesis of (1Z,2E)-2-(((N-((E)-2-(methoxycarbonyl)-3-phenylallyl)-4-methylphenyl)sulfonamido)methyl)-N-methyl-3-phenylprop-2-en-1-imine oxide (12a)**

A suspension of N-Methylhydroxylamine hydrochloride **4b** (0.38 g, 4.60 mmol), 4 Å MS and pyridine (0.44 g, 5.52 mmol) in EtOH (30 ml) was stirred at 0 °C for 1 h. A solution of aldehyde **11a** (1.5 g, 3.06 mmol) in EtOH (20 ml) was added, and the resulting mixture was

stirred for 12 h. at room temperature. After completion of the reaction as monitored by TLC, the solvent was evaporated under reduced pressure, the residue was chromatographed on a silicagel column with AcOEt as eluent to give (75%) of nitrone **12a**.

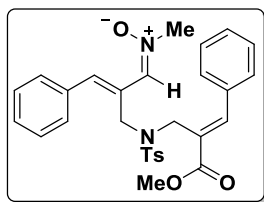

Yield (%): (75%); IR (KBr):  $\nu$  3060, 2950, 1415  $\text{cm}^{-1}$ ;  $^1\text{H}$  NMR (400 MHz,  $\text{CDCl}_3$ ):  $\delta$  2.37 (s, 3H), 3.36 (s, 3H), 3.41 (s, 3H), 4.02 (d, 2H,  $J = 1.6$  Hz), 4.09 (s, 1H), 7.04 – 7.59 (m, 17H);  $^{13}\text{C}$  NMR (100 MHz,  $\text{CDCl}_3$ ):  $\delta$  21.6, 45.4, 47.4, 52.0, 54.6, 124.8, 126.9, 127.3, 127.6, 128.2, 128.3, 128.7, 129.7, 129.9, 130.5, 134.2, 134.7, 136.1, 137.9, 143.9, 144.7, 167.3; MS (m/z): 518 [M].<sup>+</sup> Calculated for  $\text{C}_{29}\text{H}_{30}\text{N}_2\text{O}_5\text{S}$ : C, 67.16; H, 5.83; N, 5.40; Found: C, 67.13; H, 5.78; N, 5.46.

#### Typical experimental procedure for the synthesis of (*E*)-methyl 7-benzylidene-1-methyl-3-phenyl-5-tosyl octahydroisoxazolo[4,3-*c*]pyridine-3a-carboxylate (**13a**)

A mixture of (*Z*)-methyl 2-((*N*-((*E*)-2-formyl-3-phenylallyl)-4-methylphenylsulfonamido)methyl)-3-phenylacrylate **11a** (1 g, 2 mmol) *N*-methylhydroxyl amine hydrochloride **4b** (0.26 g, 3 mmol) and pyridine (0.24 g, 3 mmol) with 4Å MS in ethanol (10 mL) was refluxed for 6 h. After the completion of the reaction as indicated by TLC, the reaction mixture was concentrated and the resulting crude mass was diluted with water (15 mL) and extracted with ethyl acetate ( $3 \times 15$  mL). The combined organic layer was washed with brine ( $3 \times 15$  mL) and dried over anhydrous  $\text{Na}_2\text{SO}_4$ , the organic layer was concentrated and purified by column chromatography on silica gel (60-120 mesh), using ethyl acetate-hexane (1:9) to afford the pure compound i.e., (*E*)-Methyl 7-benzylidene-1-methyl-3-phenyl-5-tosyl octahydroisoxazolo[4,3-*c*]pyridine-3a-carboxylate **13a**.

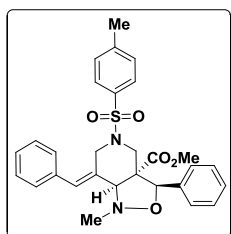

Yield (%): 83%; mp.: 170-172 °C; IR (KBr):  $\nu$  1735, 1588, 1343  $\text{cm}^{-1}$ ;  $^1\text{H}$  NMR (300 MHz,  $\text{CDCl}_3$ ):  $\delta$  2.43 (s, 3H), 2.65 (d, 1H,  $J = 12.3$  Hz), 2.1 (s, 3H), 3.00 (d, 1H,  $J = 12.3$  Hz), 3.62 (d, 1H,  $J = 12$  Hz), 3.82 (s, 3H), 4.00 (s, 1H), 4.60 (d, 1H,  $J = 12.6$  Hz), 5.44 (s, 1H), 6.66 (s, 1H), 7.23 – 7.42 (m, 14H);  $^{13}\text{C}$  NMR (75 MHz,  $\text{CDCl}_3$ ):  $\delta$  21.4, 44.1, 44.2, 45.9, 52.9, 60.7, 82.8, 126.2, 127.6, 127.9, 128.0, 128.3, 128.5, 128.6, 128.9, 129.6, 132.9, 133.2, 134.7, 135.1, 143.7, 170.8.; MS (m/z): 518  $[\text{M}]^+$ ; Calculated for  $\text{C}_{29}\text{H}_{30}\text{N}_2\text{O}_5\text{S}$ : C, 67.16; H, 5.83; N, 5.40; Found: C, 67.13; H, 5.79; N, 5.45.

**(E)-Methyl 7-benzylidene-1-methyl-3-p-tolyl-5-tosyloctahydroisoxazolo[4,3-c]pyridine-3a-carboxylate (13b)**

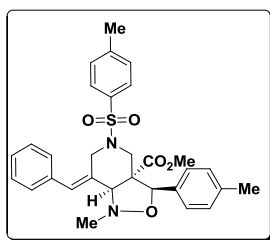

Yield (%): 80%; mp.: 172-174 °C; IR (KBr):  $\nu$  1667, 1624, 1594  $\text{cm}^{-1}$ ;  $^1\text{H}$  NMR (300 MHz,  $\text{CDCl}_3$ ):  $\delta$  2.39 (s, 3H), 2.44 (s, 3H), 2.68 (d, 1H,  $J = 12$  Hz), 2.81 (s, 3H), 3.02 (d, 1H,  $J = 12.6$  Hz), 3.64 (d, 1H,  $J = 11.7$  Hz), 3.80 (s, 3H), 4.01 (s, 1H), 4.59 (d, 1H,  $J = 12.3$  Hz), 5.41 (s, 1H), 6.65 (s, 1H), 7.07 – 7.45 (m, 13H);  $^{13}\text{C}$  NMR (75 MHz,  $\text{CDCl}_3$ ):  $\delta$  21.2, 21.5, 44.1, 44.2, 45.6, 52.8, 60.8, 82.9, 126.1, 127.6, 127.8, 128.2, 128.4, 128.5, 128.9, 129.0, 129.6, 131.3, 133.0, 135.1, 138.3, 143.6, 170.4; MS (m/z): 532  $[\text{M}]^+$ ; Calculated for  $\text{C}_{30}\text{H}_{32}\text{N}_2\text{O}_5\text{S}$ : C, 67.65; H, 6.06; N, 5.26; Found: C, 67.61; H, 6.02; N, 5.30.

**(E)-Butyl 7-benzylidene-1-methyl-3-p-tolyl-5-tosyloctahydroisoxazolo[4,3-c]pyridine-3a-carboxylate (13c)**

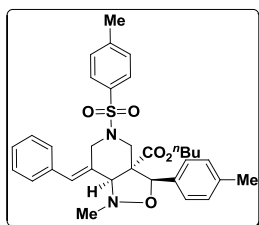

Yield (%): 82%; mp.: 165-167 °C; IR (KBr):  $\nu$  1735, 1651 1614  $\text{cm}^{-1}$ ;  $^1\text{H}$  NMR (300 MHz,  $\text{CDCl}_3$ ):  $\delta$  0.92 (t, 3H,  $J = 7.2$  Hz), 1.38 (q, 2H,  $J = 7.5$  Hz), 1.63 – 1.68 (m, 2H), 2.39 (s, 3H), 2.43 (s, 3H), 2.66 (d, 1H,  $J = 11.7$  Hz), 2.81 (s, 3H), 2.98 (t, 1H,  $J = 12.3$  Hz), 3.65 (d, 1H,  $J = 11.7$  Hz), 3.98 (s, 1H), 4.22 (t, 2H,  $J = 6.3$  Hz), 4.57 (d, 1H,  $J = 12.3$  Hz), 5.43 (s, 1H), 6.63 (s,

1H), 7.09 – 7.45 (m, 13H); <sup>13</sup>C NMR (75 MHz, CDCl<sub>3</sub>): δ 13.6, 19.0, 21.2, 21.5, 30.4, 44.0, 44.2, 45.7, 60.7, 65.8, 82.8, 126.1, 127.7, 127.8, 128.3, 128.5, 128.8, 128.9, 129.6, 131.6, 132.9, 135.1, 138.2, 143.6, 170.0; MS (m/z): 574 [M]<sup>+</sup>; Calculated for C<sub>33</sub>H<sub>38</sub>N<sub>2</sub>O<sub>5</sub>S: C, 68.96; H, 6.66; N, 4.87; Found: C, 68.93; H, 6.69; N, 4.90.

**(E)-Butyl 7-benzylidene-3-(4-isopropylphenyl)-1-methyl-5-tosylocta hydroisoxazolo[4,3-c]pyridine-3a-carboxylate (13d)**

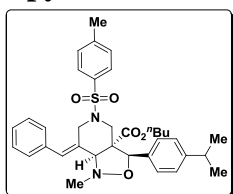

Yield (%): 84%; mp.: 162-164 °C; IR (KBr): ν 1667, 1624, 1594 cm<sup>-1</sup>; <sup>1</sup>H NMR (300 MHz, CDCl<sub>3</sub>): δ 0.91 (t, 3H, J = 7.2 Hz), 1.28 – 1.43 (m, 8H), 1.63 – 1.68 (m, 2H), 2.43 (s, 3H), 2.66 (t, 1H, J = 12 Hz), 2.80 (s, 3H), 2.90 – 3.00 (m, 2H), 3.67 (d, 1H, J = 11.7Hz), 3.98 (s, 1H), 4.23 (t, 2H, J = 6.6 Hz), 4.58 (d, 1H, J = 12.6 Hz), 5.43 (s, 1H), 6.64 (s, 1H), 7.14 – 7.44 (m, 13H).

<sup>13</sup>C NMR (75 MHz, CDCl<sub>3</sub>): δ 13.6, 19.0, 21.5, 23.9, 24.0, 30.4, 33.9, 44.1, 45.9, 60.7, 65.8, 82.8, 126.3, 127.6, 127.8, 128.3, 128.5, 128.8, 129.6, 131.9, 132.9, 135.2, 143.6, 149.2, 170.1; MS (m/z): 602 [M]<sup>+</sup>; Calculated for C<sub>35</sub>H<sub>42</sub>N<sub>2</sub>O<sub>5</sub>S: C, 69.74; H, 7.02; N, 4.65; Found: C, 69.72; H, 7.05; N, 4.67.

**(E)-Butyl 7-benzylidene-3-(2,4-dichlorophenyl)-1-methyl-5-tosyloctahydroisoxazolo[4,3-c]pyridine-3a-carboxylate (13e)**

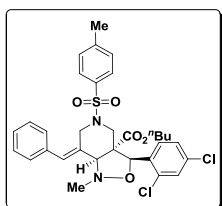

Yield (%): 86%; mp.: 167-169 °C; IR (KBr): ν 1668, 1624, 1593 cm<sup>-1</sup>; <sup>1</sup>H NMR (300 MHz, CDCl<sub>3</sub>): δ 0.91 (t, 3H, J = 7.5 Hz), 1.35 – 1.42 (m, 2H), 1.61 – 1.68 (m, 2H), 2.43 (s, 3H), 2.65 (d, 2H, J = 11.2 Hz), 2.78 (s, 3H), 2.96 (d, 2H, J = 12.3 Hz), 3.64 (d, 1H, J = 11.4 Hz), 3.98 (s, 1H), 4.07 – 4.31 (m, 2H), 4.52 (d, 1H, J = 12.3 Hz), 5.77 (s, 1H), 6.65 (s, 1H), 7.17 – 7.48 (m, 12H); <sup>13</sup>C NMR (75 MHz, CDCl<sub>3</sub>): δ 13.6, 19.0, 21.5, 30.2, 43.7, 44.1, 45.5, 59.6, 66.1, 77.9, 79.7, 126.8, 127.6, 127.7, 127.9, 128.5, 128.8, 129.4, 129.5, 129.6, 132.1, 132.8, 133.2, 133.6,



134.8, 134.9, 143.7, 169.6; MS (m/z): 628 [M]<sup>+</sup>; Calculated for C<sub>32</sub>H<sub>34</sub>Cl<sub>2</sub>N<sub>2</sub>O<sub>5</sub>S: C, 61.05; H, 5.44; N, 4.45; Found: C, 61.03; H, 5.47; N, 4.48.

**(E)-Butyl 7-benzylidene-3-(4-fluorophenyl)-1-methyl-5-tosyl octahydroisoxazolo[4,3-c]pyridine-3a-carboxylate (13f)**

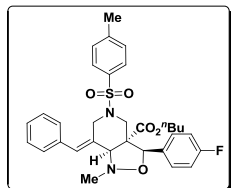

Yield (%): 84%; mp.: 165-167 °C; IR (KBr):  $\nu$  1741, 1646, 1615 cm<sup>-1</sup>; <sup>1</sup>H NMR (300 MHz, CDCl<sub>3</sub>):  $\delta$  0.92 (t, 3H, *J* = 7.2 Hz), 1.35 – 1.45 (m, 2H), 1.59 – 1.71 (m, 2H), 2.42 (s, 3H), 2.59 (d, 1H, *J* = 11.7 Hz), 2.79 (s, 3H), 2.97 (d, 2H, *J* = 11.4 Hz), 3.58 (d, 1H, *J* = 11.7 Hz), 3.95 (s, 1H), 4.23 (t, 2H, *J* = 6.6 Hz), 4.58 (d, 1H, *J* = 12.6 Hz), 5.42 (s, 1H), 6.65 (s, 1H), 7.02 – 7.48 (m, 13H); <sup>13</sup>C NMR (75 MHz, CDCl<sub>3</sub>):  $\delta$  13.6, 19.0, 21.5, 30.4, 44.0, 44.1, 46.0, 60.4, 65.9, 82.0, 115.1, 115.3, 127.6, 127.8, 127.9, 128.0, 128.1, 128.5, 128.8, 129.6, 130.8, 130.8, 132.9, 133.3, 135.1, 143.7, 161.0, 164.3, 170.1. MS (m/z): 578 [M]<sup>+</sup>; Calculated for C<sub>32</sub>H<sub>35</sub>FN<sub>2</sub>O<sub>5</sub>S: C, 66.42; H, 6.10; N, 4.84. Found: C, 66.45; H, 6.14; N, 4.87.

9.577  
 8.070  
 7.365  
 7.354  
 7.344  
 7.271  
 7.263  
 6.962  
 6.949  
 6.213  
 6.204  
 6.192  
 5.471  
 3.767

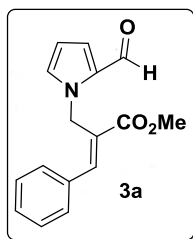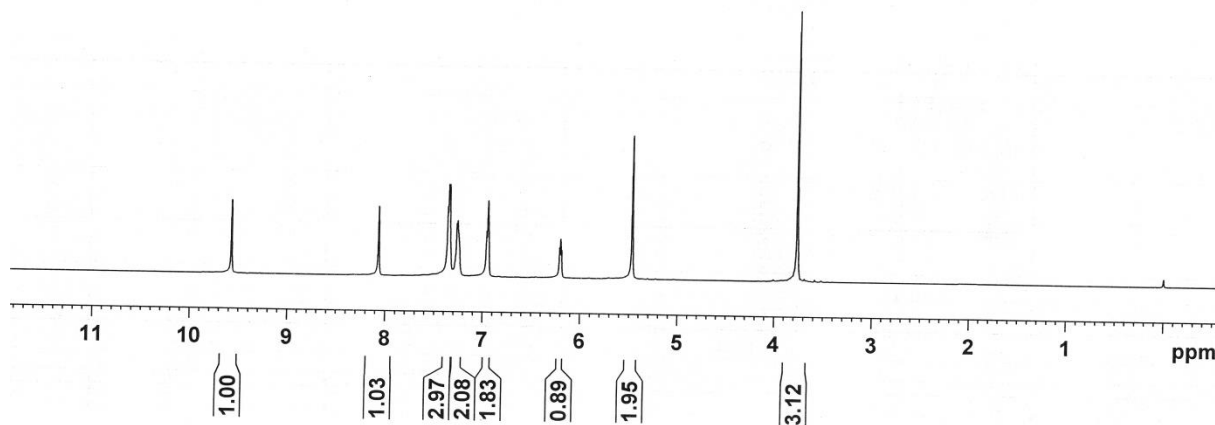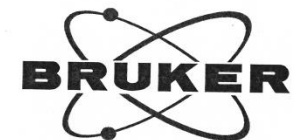

Current Data Parameters  
 NAME JS-PYROLE-N-ALY  
 EXPNO 2  
 PROCNO 1

F2 - Acquisition Parameters  
 Date\_ 20131205  
 Time 21.12  
 INSTRUM spect  
 PROBHD 5 mm DUL 13C-1  
 PULPROG zg30  
 TD 65536  
 SOLVENT CDCl3  
 NS 8  
 DS 2  
 SWH 6172.839 Hz  
 FIDRES 0.094190 Hz  
 AQ 5.3084660 sec  
 RG 57  
 DW 81.000 usec  
 DE 6.00 usec  
 TE 300.0 K  
 D1 1.00000000 sec  
 TD0 1

===== CHANNEL f1 =====  
 NUC1 1H  
 P1 13.15 usec  
 PL1 0.00 dB  
 SFO1 300.1318534 MHz

F2 - Processing parameters  
 SI 32768  
 SF 300.1300060 MHz  
 WDW EM  
 SSB 0  
 LB 0.30 Hz  
 GB 0  
 PC 1.00

179.55  
167.33  
145.16  
133.97  
131.84  
129.71  
129.16  
129.04  
128.86  
126.61  
124.76  
109.91  
77.54  
77.12  
76.69  
52.40  
45.11

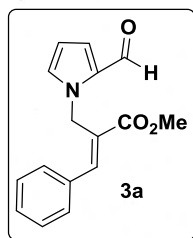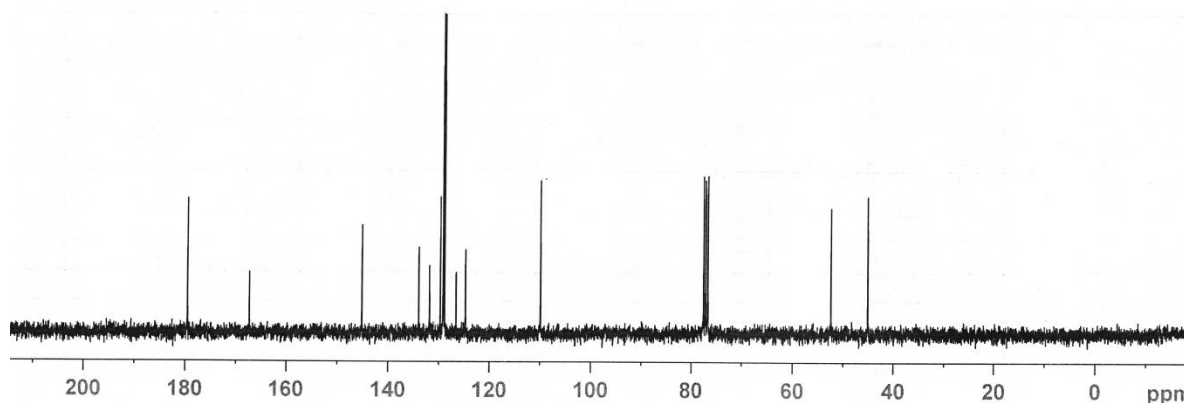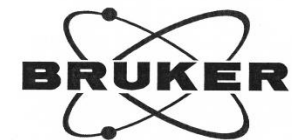

Current Data Parameters  
NAME JS-PYROLE-N-ALY  
EXPNO 1  
PROCNO 1

F2 - Acquisition Parameters  
Date\_ 20131205  
Time 21.10  
INSTRUM spect  
PROBHD 5 mm DUL 13C-1  
PULPROG zgpg30  
TD 65536  
SOLVENT CDCl3  
NS 26  
DS 4  
SWH 17985.611 Hz  
FIDRES 0.274439 Hz  
AQ 1.8219508 sec  
RG 574.7  
DW 27.800 usec  
DE 6.00 usec  
TE 300.0 K  
D1 2.00000000 sec  
d11 0.03000000 sec  
DELTA 1.89999998 sec  
TD0 1

===== CHANNEL f1 =====

NUC1 13C  
P1 9.30 usec  
PL1 0.00 dB  
SFO1 75.4752953 MHz

===== CHANNEL f2 =====

CPDPRG2 waltz16  
NUC2 1H  
PCPD2 80.00 usec  
PL2 0.00 dB  
PL12 15.68 dB  
PL13 16.00 dB  
SFO2 300.1312005 MHz

F2 - Processing parameters  
SI 32768  
SF 75.4677490 MHz

PROTON CDC13 {D:\MB} KOPAL 1

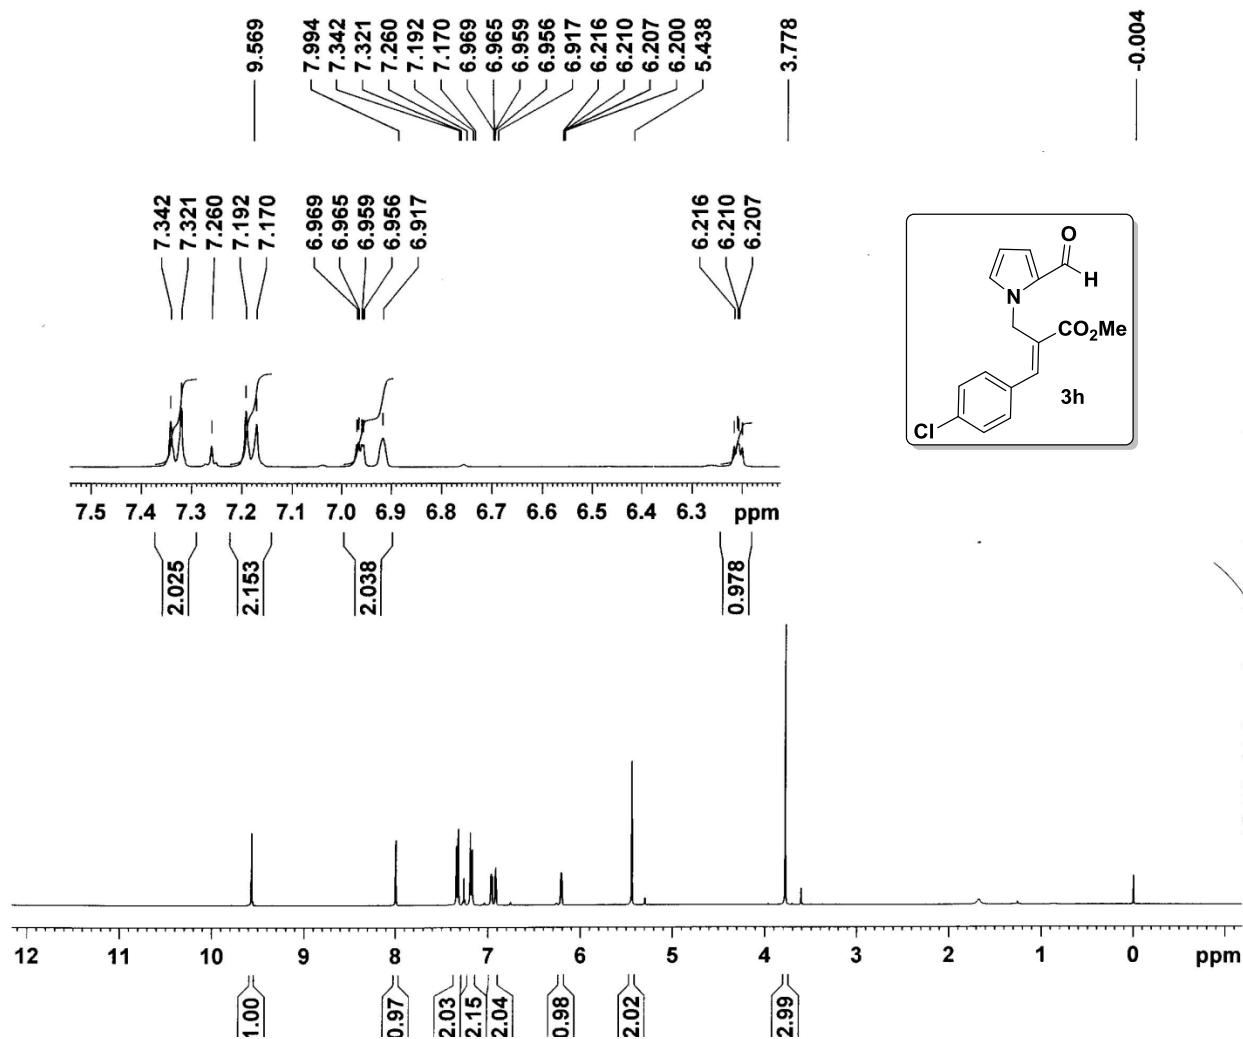

Current Data Parameters  
NAME VA-JS-ESTER-4CL  
EXPNO 1  
PROCNO 1

F2 - Acquisition Parameters  
Date\_ 20150703  
Time\_ 14.45  
INSTRUM spect  
PROBHD 5 mm DUL 13C-1  
PULPROG zg30  
TD 65536  
SOLVENT CDC13  
NS 16  
DS 2  
SWH 8223.685 Hz  
FIDRES 0.125483 Hz  
AQ 3.9846387 sec  
RG 161  
DW 60.800 usec  
DE 6.00 usec  
TE 296.7 K  
D1 1.00000000 sec  
TD0 1

===== CHANNEL f1 =====  
NUC1 1H  
P1 11.42 usec  
PI1 -3.00 dB  
SF01 400.1324710 MHz

F2 - Processing parameters  
SI 32768  
SF 400.1300050 MHz  
WDW EM  
SSB 0  
LB 0.30 Hz  
GB 0  
PC 1.00

C13CPD CDC13 {D:\MB} KOPAL 1

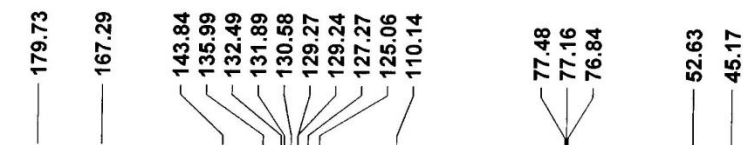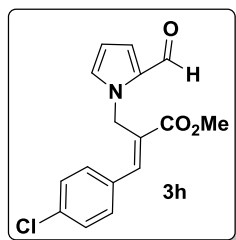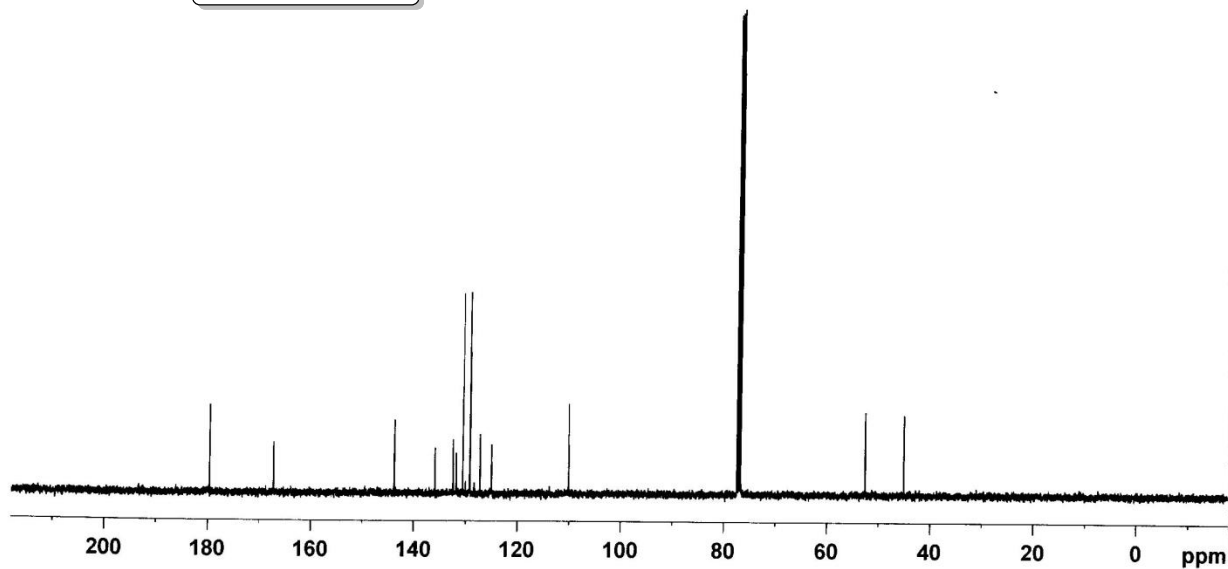

Current Data Parameters  
NAME VA-JS-ESTER-4CL  
EXPNO 2  
PROCNO 1

F2 - Acquisition Parameters  
Date 20150703  
Time 14.47  
INSTRUM spect  
PROBHD 5 mm DUL 13C-1  
PULPROG zgpg30  
TD 65536  
SOLVENT CDC13  
NS 138  
DS 4  
SWH 24038.461 Hz  
FIDRES 0.366798 Hz  
AQ 1.3631988 sec  
RG 45.2  
DW 20.800 usec  
DE 6.00 usec  
TE 297.2 K  
D1 2.00000000 sec  
d11 0.03000000 sec  
DELTA 1.89999998 sec  
TD0 1

==== CHANNEL f1 =====  
NUC1 13C  
P1 9.15 usec  
PL1 0.00 dB  
SFO1 100.6228298 MHz

==== CHANNEL f2 =====  
CPDPRG2 waltz16  
NUC2 1H  
PCPD2 90.00 usec  
PL12 14.90 dB  
PL13 14.90 dB  
PL2 -3.00 dB  
SFO2 400.1316005 MHz

F2 - Processing parameters  
SI 32768  
SF 100.6127553 MHz  
WDW EM  
SSB 0  
LB 1.00 Hz  
GB 1.40  
PC

C13DEPT135 CDC13 {D:\MB} KOPAL 1

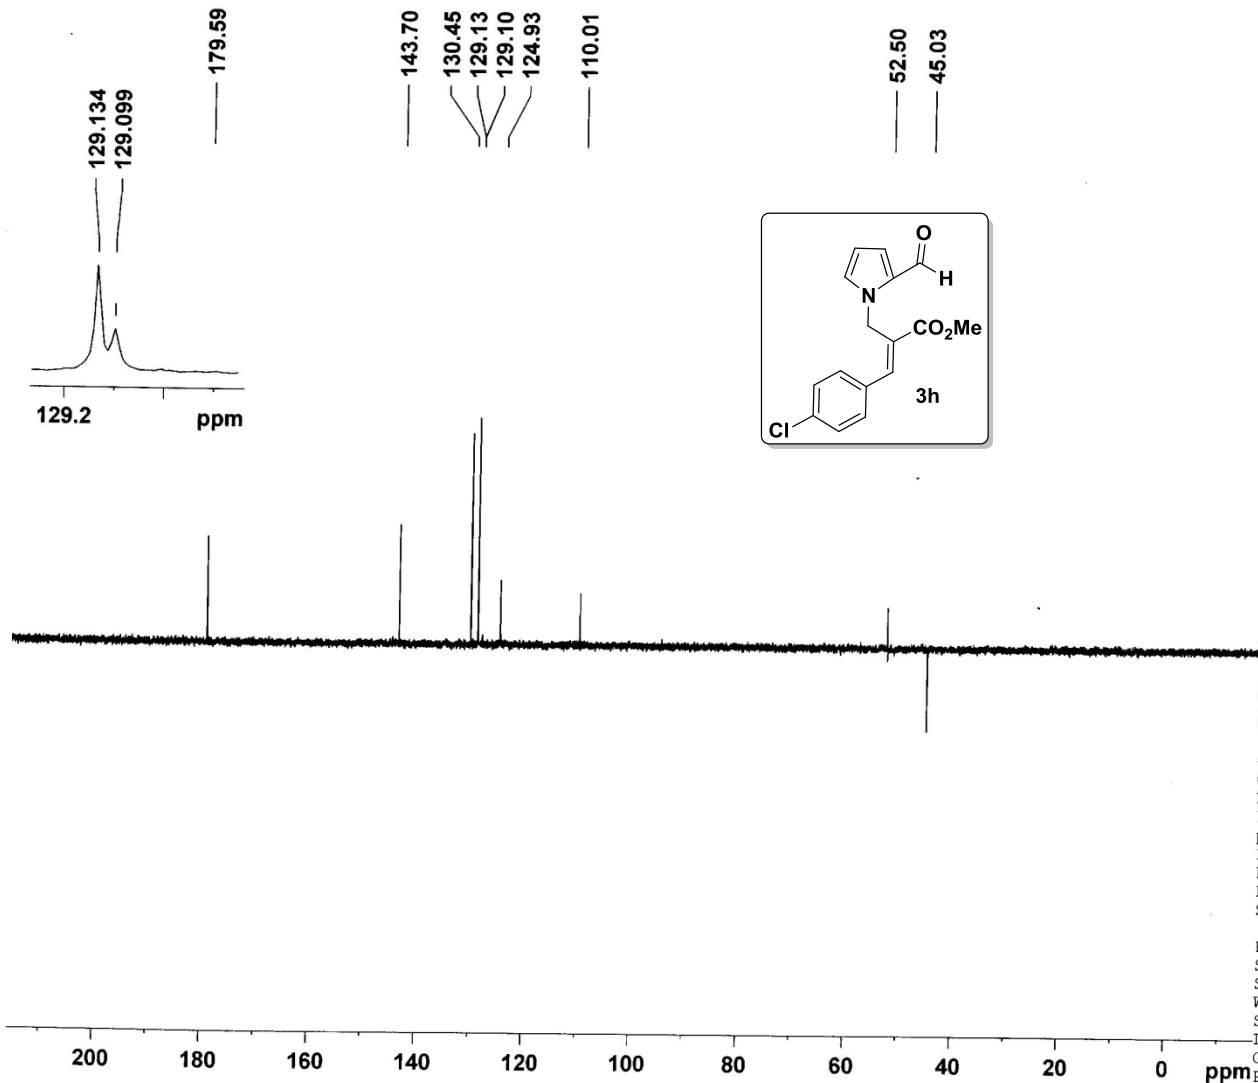

Current Data Parameters  
NAME VA-JS-ESTER-4CL  
EXPNO 3  
PROCNO 1

F2 - Acquisition Parameters  
Date\_ 20150703  
Time 14.57  
INSTRUM spect  
PROBHD 5 mm DUL 13C-1  
PULPROG dept135  
TD 65536  
SOLVENT CDC13  
NS 58  
DS 4  
SWH 24038.461 Hz  
FIDRES 0.366798 Hz  
AQ 1.3631988 sec  
RG 2050  
DW 20.800 usec  
DE 6.00 usec  
TE 297.1 K  
CNST2 145.0000000  
D1 2.00000000 sec  
d12 0.00002000 sec  
d2 0.00344828 sec  
DELTA 0.00001165 sec  
TDO 1

==== CHANNEL f1 =====  
NUC1 13C  
P1 9.15 usec  
p2 18.30 usec  
PL1 0.00 dB  
SFO1 100.6228298 MHz

==== CHANNEL f2 =====  
CPDPRG2 waltz16  
NUC2 1H  
P3 11.42 usec  
p4 22.84 usec  
PCPD2 90.00 usec  
PL12 14.90 dB  
PL2 -3.00 dB  
SFO2 400.1316005 MHz

F2 - Processing parameters  
SI 32768  
SF 100.6127690 MHz  
WDW EM  
SSB 0  
LB 1.00 Hz  
GB 0  
PC 1.40

PROTON CDC13 {D:\MB} KOPAL 1

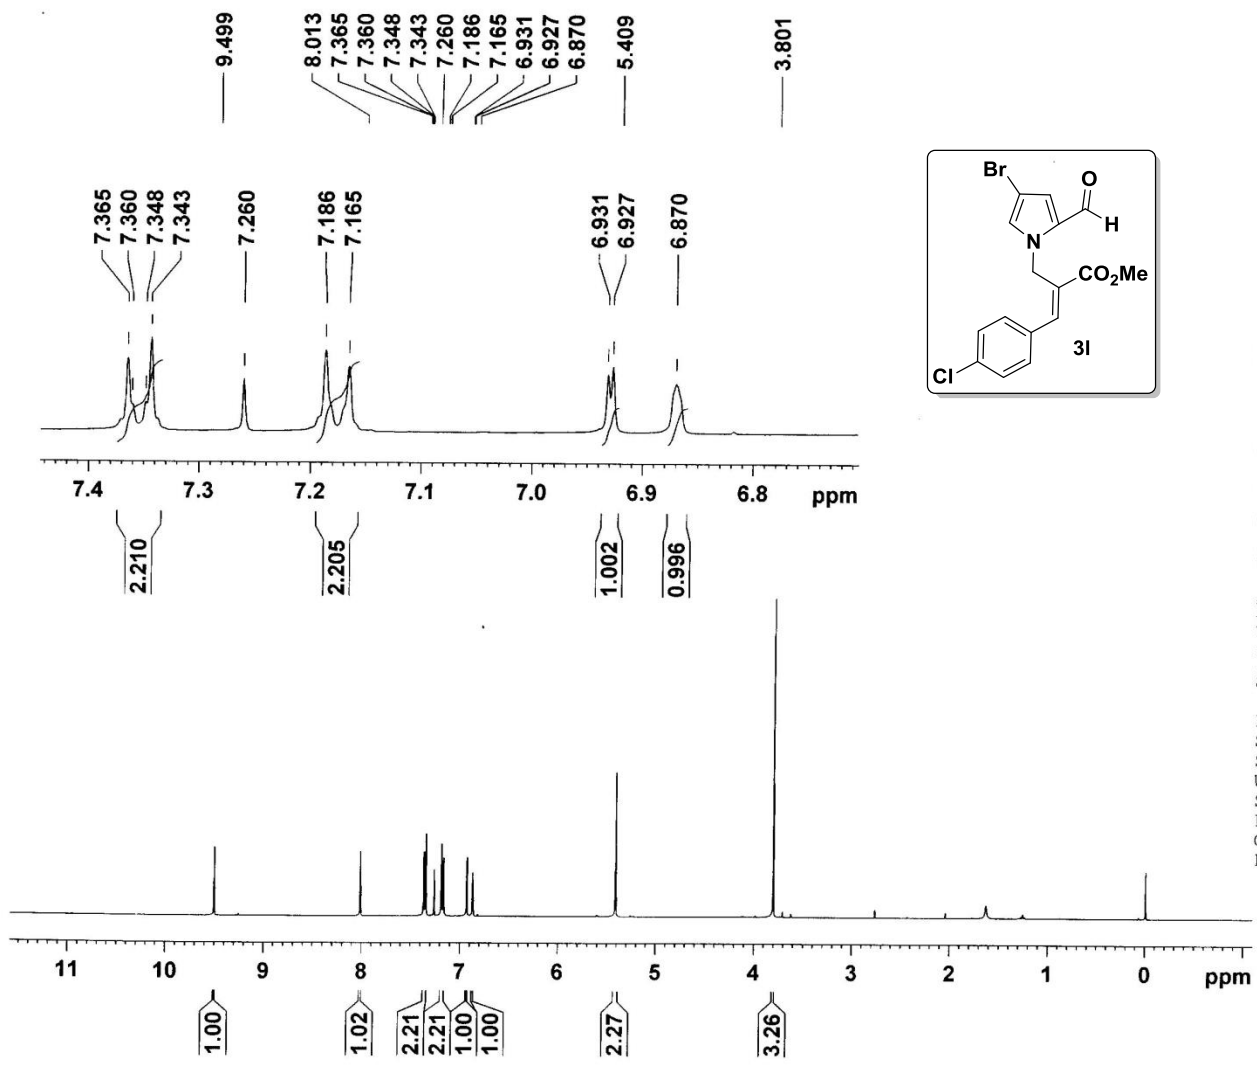

Current Data Parameters  
NAME VA-JS-BR-6  
EXPNO 1  
PROCNO 1

F2 - Acquisition Parameters  
Date\_ 20150703  
Time 11.24  
INSTRUM spect  
PROBHD 5 mm DUL 13C-1  
PULPROG zg30  
TD 65536  
SOLVENT CDC13  
NS 16  
DS 2  
SWH 8223.685 Hz  
FIDRES 0.125483 Hz  
AQ 3.9846387 sec  
RG 203  
DW 60.800 usec  
DE 6.00 usec  
TE 296.8 K  
D1 1.00000000 sec  
TD0 1

===== CHANNEL f1 =====  
NUC1 1H  
P1 11.42 usec  
PL1 -3.00 dB  
SFO1 400.1324710 MHz

F2 - Processing parameters  
SI 32768  
SF 400.1300051 MHz  
WDW EM  
SSB 0  
LB 0.30 Hz  
GB 0  
PC 1.00

C13CPD CDC13 {D:\MB} KOPAL 1

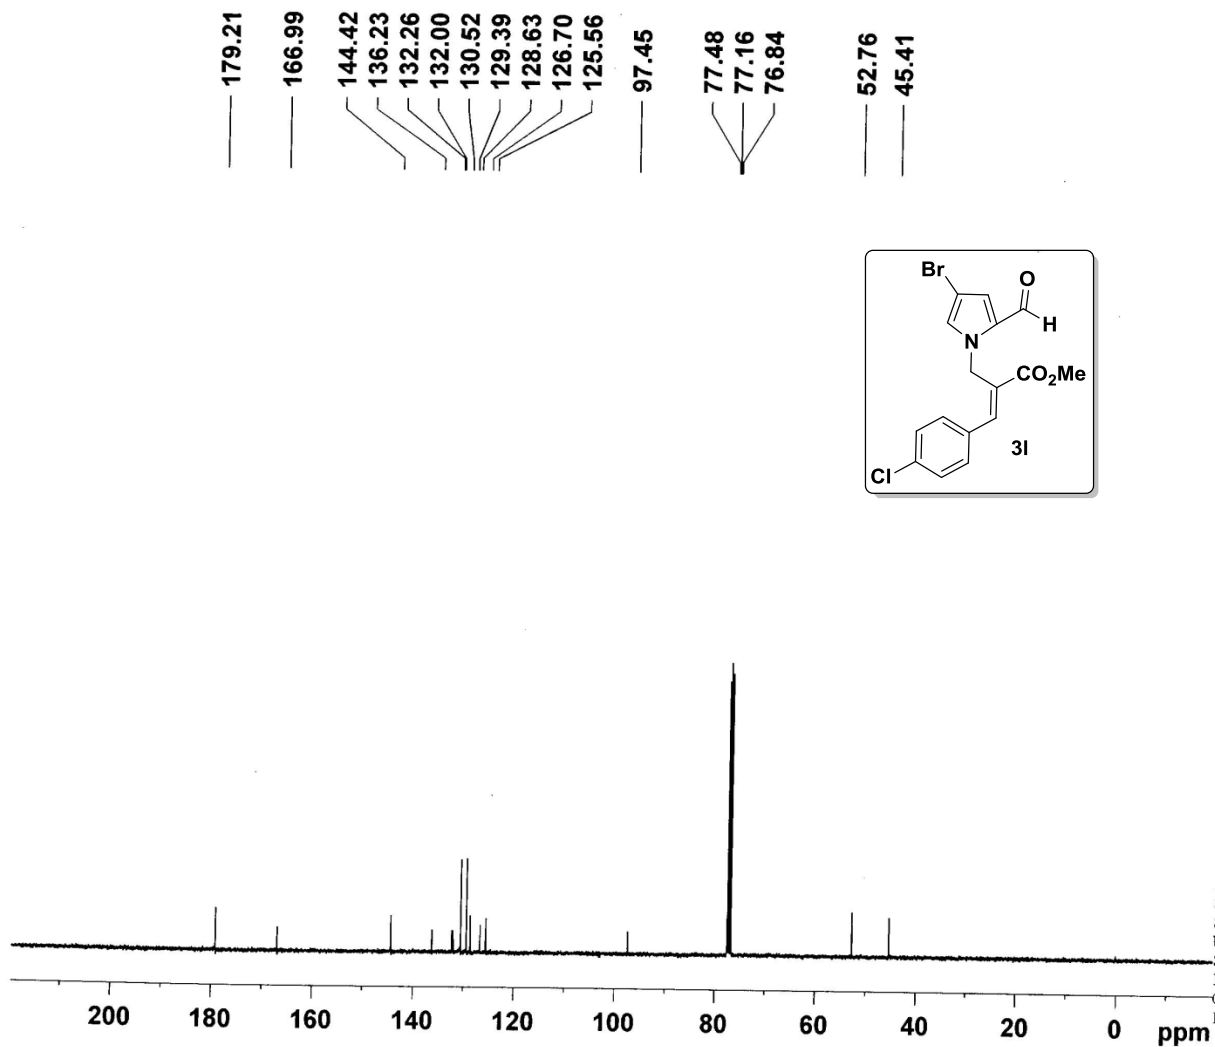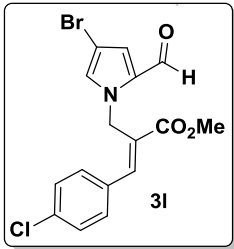

Current Data Parameters  
NAME VA-JS-BR-6  
EXPNO 2  
PROCNO 1

F2 - Acquisition Parameters  
Date\_ 20150703  
Time 11.39  
INSTRUM spect  
PROBHD 5 mm DUL 13C-1  
PULPROG zgpg30  
TD 65536  
SOLVENT CDC13  
NS 256  
DS 4  
SWH 24038.461 Hz  
FIDRES 0.366798 Hz  
AQ 1.3631988 sec  
RG 50.8  
DW 20.800 usec  
DE 6.00 usec  
TE 297.3 K  
D1 2.00000000 sec  
d11 0.03000000 sec  
DELTA 1.89999998 sec  
TD0 1

==== CHANNEL f1 =====  
NUC1 13C  
P1 9.15 usec  
PL1 0.00 dB  
SFO1 100.6228298 MHz

==== CHANNEL f2 =====  
CPDPRG2 waltz16  
NUC2 1H  
PCPD2 90.00 usec  
PL12 14.90 dB  
PL13 14.90 dB  
PL2 -3.00 dB  
SFO2 400,1316005 MHz

F2 - Processing parameters  
SI 32768  
SF 100.6127545 MHz  
WDW EM  
SSB 0  
LB 1.00 Hz  
GB ^  
PC 1.



C13DEPT135 CDCl3 {D:\MB} KOPAL 1

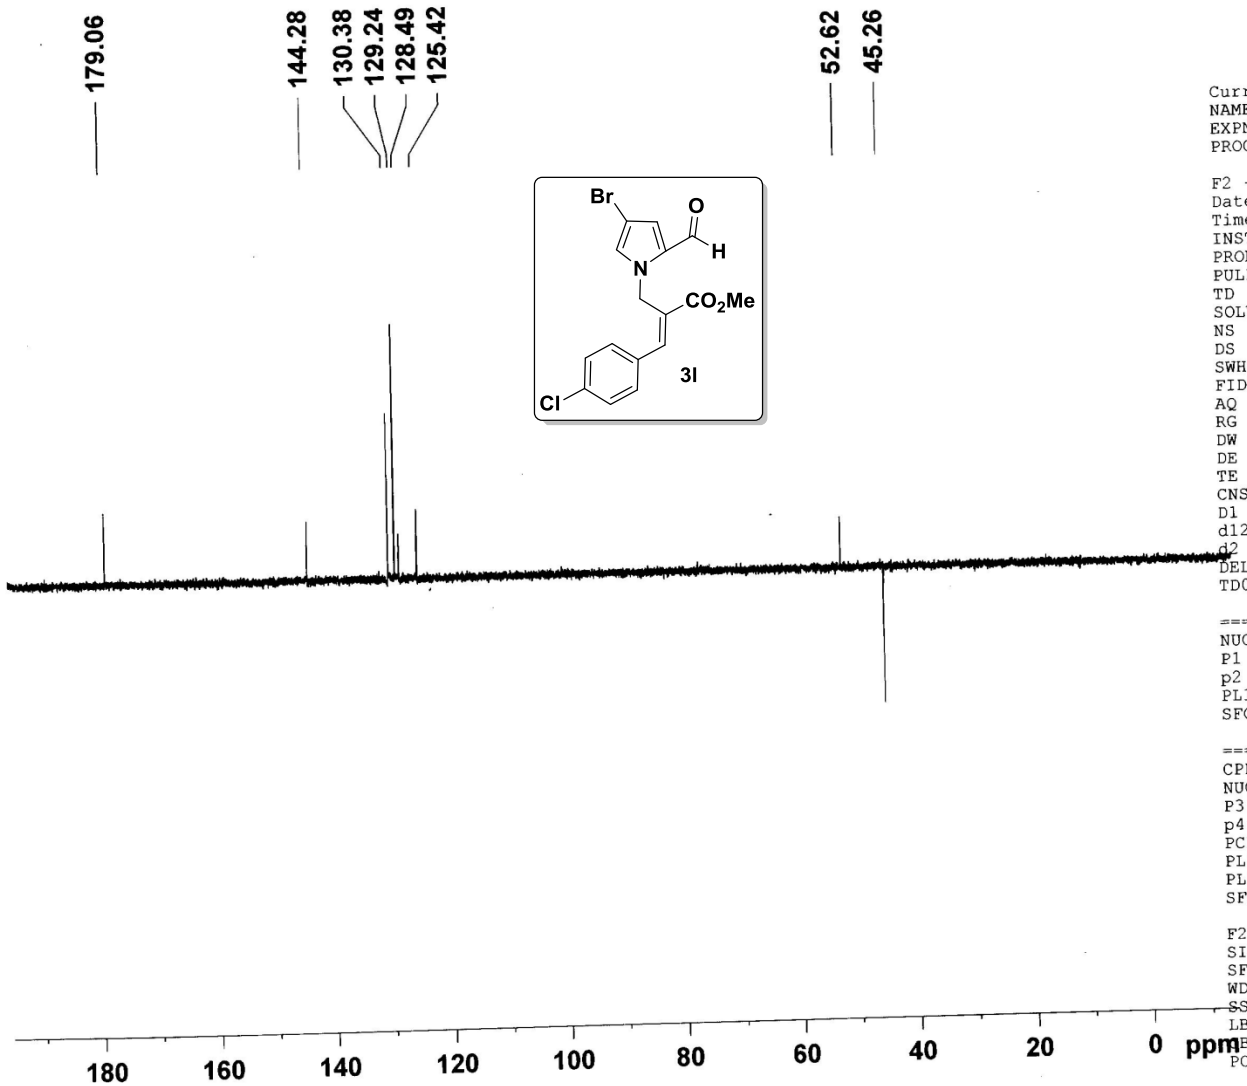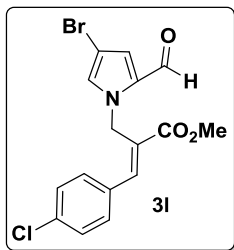

Current Data Parameters  
NAME VA-JS-BR-6  
EXPNO 3  
PROCNO 1

F2 - Acquisition Parameters  
Date\_ 20150703  
Time 13.04  
INSTRUM spect  
PROBHD 5 mm DUL 13C-1  
PULPROG dept135  
TD 65536  
SOLVENT CDCl3  
NS 109  
DS 4  
SWH 24038.461 Hz  
FIDRES 0.366798 Hz  
AQ 1.3631988 sec  
RG 2050  
DW 20.800 usec  
DE 6.00 usec  
TE 297.1 K  
CNST2 145.000000  
D1 2.00000000 sec  
d12 0.00002000 sec  
d2 0.00344828 sec  
DELTA 0.00001165 sec  
TDO 1

===== CHANNEL f1 =====  
NUC1 13C  
P1 9.15 usec  
p2 18.30 usec  
PL1 0.00 dB  
SFO1 100.6228298 MHz

===== CHANNEL f2 =====  
CPDPRG2 waltz16  
NUC2 1H  
P3 11.42 usec  
p4 22.84 usec  
PCPD2 90.00 usec  
PL12 14.90 dB  
PL2 -3.00 dB  
SFO2 400.1316005 MHz

F2 - Processing parameters  
SI 32768  
SF 100.6127690 MHz  
WDW EM  
SSB 0  
LB 1.00 Hz  
PC 1.40

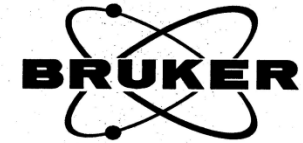

Current Data Parameters  
NAME JSI-284  
EXPNO 2  
PROCNO 1

F2 - Acquisition Parameters  
Date 20101123  
Time 15.47  
INSTRUM spect  
PROBHD 5 mm DUL 13C-1  
PULPROG zg30  
TD 65536  
SOLVENT CDC13  
NS 16  
DS 2  
SWH 6172.839 Hz  
FIDRES 0.094190 Hz  
AQ 5.3084660 sec  
RG 322.5  
DW 81.000 usec  
DE 6.00 usec  
TE 300.0 K  
D1 1.00000000 sec  
TD0 1

===== CHANNEL f1 =====  
NUC1 1H  
P1 13.15 usec  
PL1 0.00 dB  
SFO1 300.1318534 MHz

F2 - Processing parameters  
SI 32768  
SF 300.1300068 MHz  
WDW EM  
SSB 0  
LB 0.30 Hz  
GB 0  
PC 1.00

7.381  
7.367  
7.361  
7.337  
7.311  
7.258  
7.219  
7.195  
7.158  
7.131  
7.051  
7.027  
7.003  
6.441  
6.437  
6.276  
6.266  
6.256  
6.224  
6.215  
5.922  
5.912  
5.836  
5.694  
4.136  
4.097  
3.785  
3.738

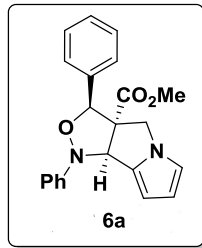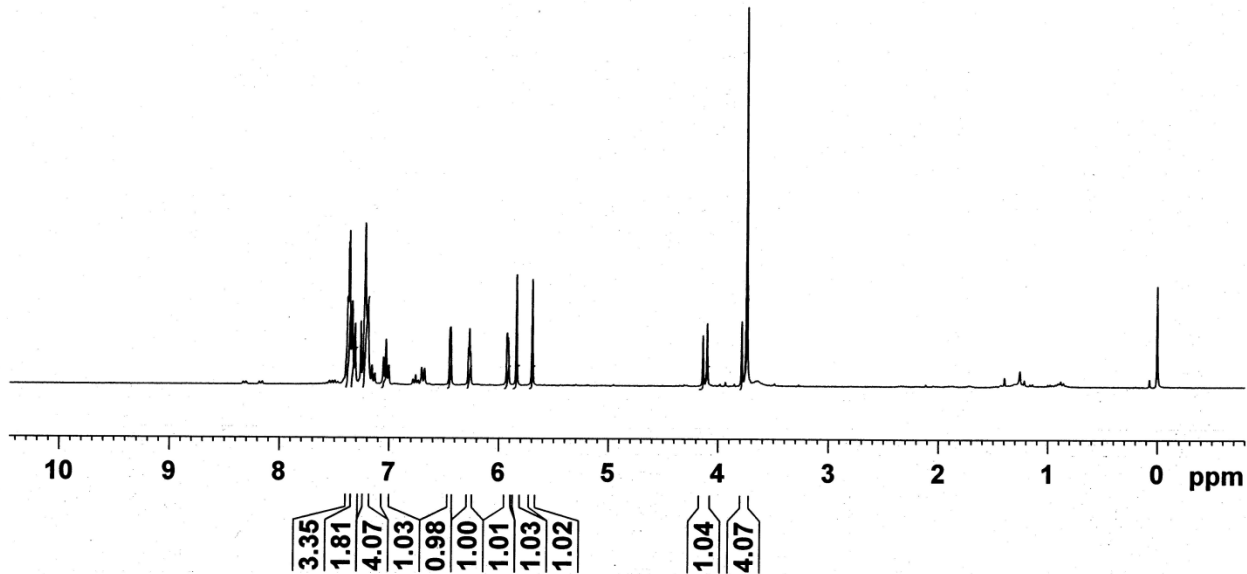

172.19  
 148.89  
 134.68  
 133.30  
 129.29  
 129.04  
 128.74  
 128.67  
 126.83  
 122.38  
 118.56  
 115.12  
 115.08  
 114.35  
 114.07  
 101.75  
 84.56  
 77.48  
 77.06  
 76.63  
 72.78  
 72.16  
 53.13  
 49.53

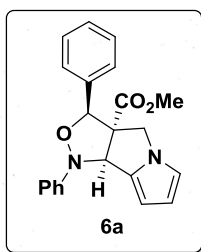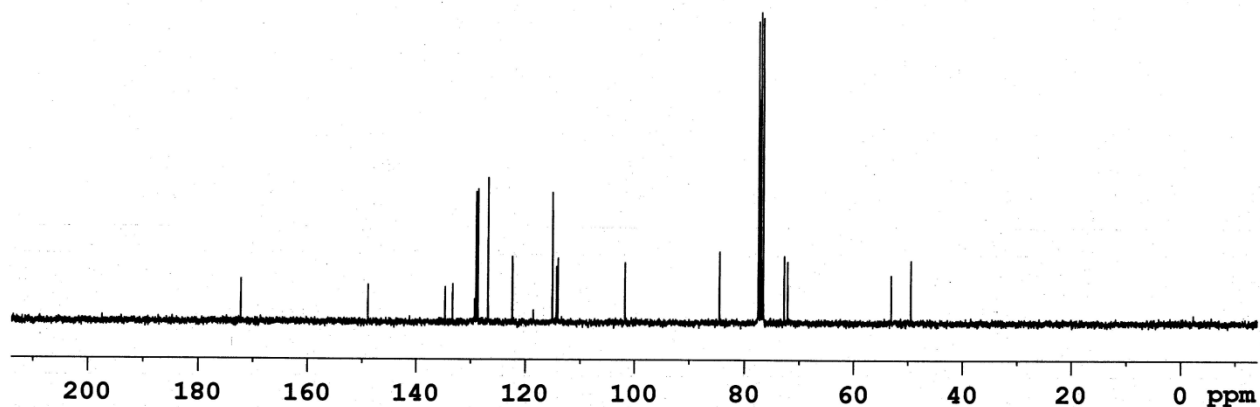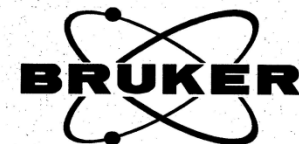

Current Data Parameters  
 NAME JSI-284  
 EXPNO 3  
 PROCNO 1

F2 - Acquisition Parameters  
 Date\_ 20101125  
 Time 12.12  
 INSTRUM spect  
 PROBHD 5 mm DUL 13C-1  
 PULPROG zgpg30  
 TD 65536  
 SOLVENT CDCl3  
 NS 200  
 DS 4  
 SWH 17985.611 Hz  
 FIDRES 0.274439 Hz  
 AQ 1.8219508 sec  
 RG 362  
 DW 27.800 usec  
 DE 6.00 usec  
 TE 300.0 K  
 D1 2.0000000 sec  
 d11 0.0300000 sec  
 DELTA 1.8999999 sec  
 TD0 1

===== CHANNEL f1 =====  
 NUC1 13C  
 P1 7.40 usec  
 PL1 -2.00 dB  
 SFO1 75.4752953 MHz

===== CHANNEL f2 =====  
 CPDPRG2 waltz16  
 NUC2 1H  
 PCPD2 80.00 usec  
 PL2 0.00 dB  
 PL12 15.68 dB  
 PL13 16.00 dB  
 SFO2 300.1312005 MHz

F2 - Processing parameters  
 SI 32768  
 SF 75.4677490 MHz  
 WDW EM  
 SSB 0  
 LB 1.00 Hz  
 GB 0  
 PC 1.40

7.869  
7.841  
7.815  
7.525  
7.505  
7.483  
7.458  
7.428  
7.401  
7.381  
7.354  
7.328  
7.302  
7.275  
7.245  
7.074  
7.050  
7.026  
6.578  
6.326  
6.287  
6.277  
6.267  
5.999  
5.989  
5.949  
4.183  
4.144  
3.691  
3.567  
3.529

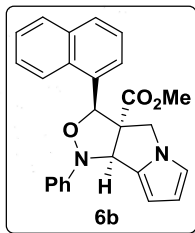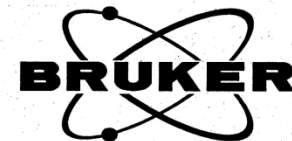

Current Data Parameters  
NAME JS-II-13  
EXPNO 1  
PROCNO 1

F2 - Acquisition Parameters  
Date\_ 20121107  
Time 1.03  
INSTRUM spect  
PROBHD 5 mm DUL 13C-1  
PULPROG zg30  
TD 65536  
SOLVENT CDC13  
NS 10  
DS 2  
SWH 6172.839 Hz  
FIDRES 0.094190 Hz  
AQ 5.3084660 sec  
RG 114  
DW 81.000 usec  
DE 6.00 usec  
TE 300.0 K  
D1 1.00000000 sec  
TDO 1

===== CHANNEL f1 =====  
NUC1 1H  
P1 13.15 usec  
PL1 0.00 dB  
SFO1 300.1318534 MHz

F2 - Processing parameters  
SI 32768  
SF 300.1300118 MHz  
WDW EM  
SSB 0  
LB 0.30 Hz  
GB 0  
PC 1.00

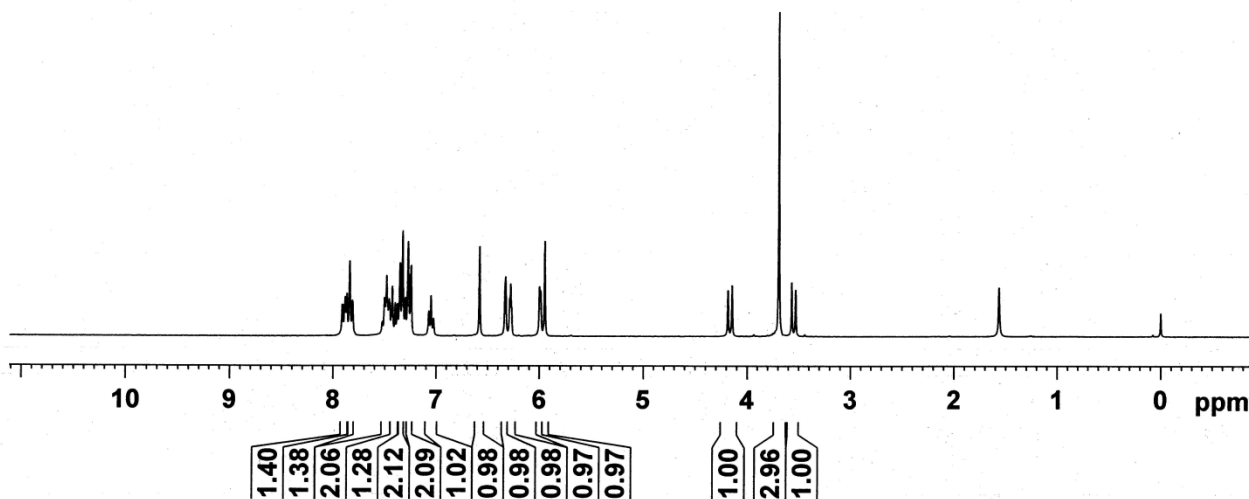

172.27  
148.96  
133.69  
132.96  
130.98  
130.56  
129.24  
129.07  
126.60  
125.88  
125.48  
125.42  
122.88  
122.50  
115.16  
114.34  
114.00  
101.71  
81.91  
77.48  
77.05  
76.63  
74.21  
71.70  
53.13  
49.39

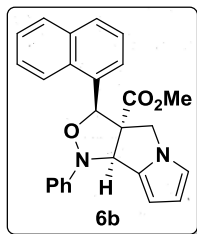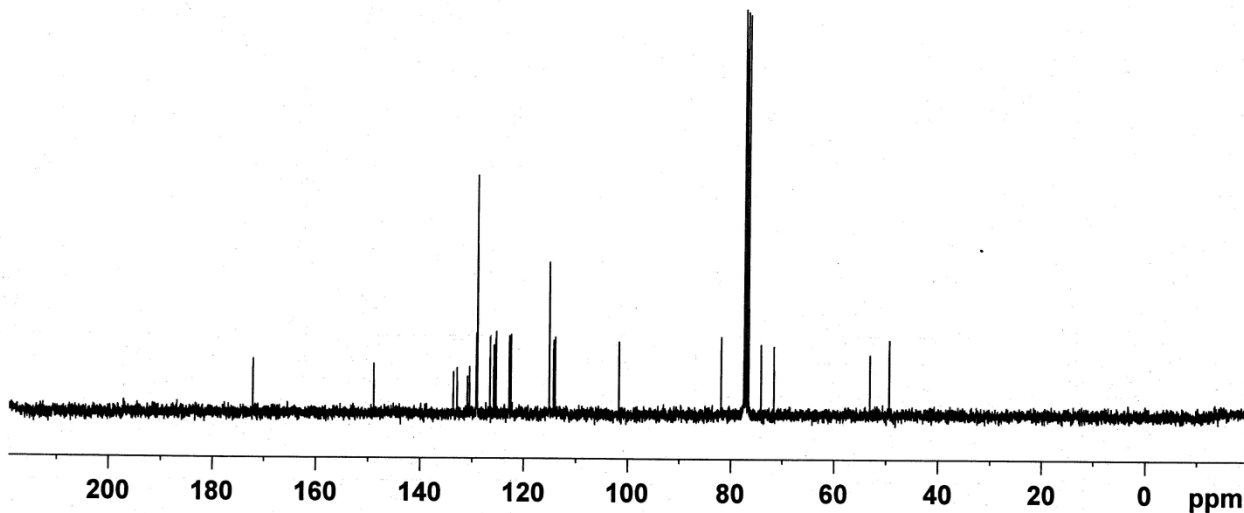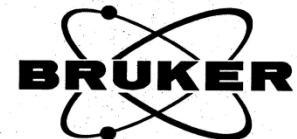

Current Data Parameters  
NAME JS-II-13  
EXPNO 2  
PROCNO 1

F2 - Acquisition Parameters  
Date\_ 20121107  
Time 1.06  
INSTRUM spect  
PROBHD 5 mm DUL 13C-1  
PULPROG zgpg30  
TD 65536  
SOLVENT CDCl3  
NS 100  
DS 4  
SWH 17985.611 Hz  
FIDRES 0.274439 Hz  
AQ 1.8219508 sec  
RG 3251  
DW 27.800 usec  
DE 6.00 usec  
TE 300.0 K  
D1 2.00000000 sec  
d11 0.03000000 sec  
DELTA 1.89999998 sec  
TDO 1

===== CHANNEL f1 =====  
NUC1 13C  
P1 9.30 usec  
PL1 0.00 dB  
SFO1 75.4752953 MHz

===== CHANNEL f2 =====  
CPDPRG2 waltz16  
NUC2 1H  
PCPD2 80.00 usec  
PL2 0.00 dB  
PL12 15.68 dB  
PL13 16.00 dB  
SFO2 300.1312005 MHz

F2 - Processing parameters  
SI 32768  
SF 75.4677490 MHz  
WDW EM  
SSB 0  
LB 1.00 Hz  
GB 0  
PC 1.40

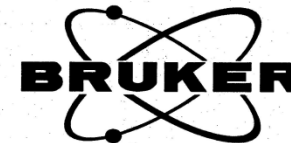

7.366  
7.338  
7.313  
7.277  
7.261  
7.218  
7.190  
7.157  
7.133  
7.054  
7.030  
7.005  
6.420  
6.416  
6.269  
6.259  
6.249  
5.956  
5.895  
5.884  
5.865  
4.287  
4.248  
3.715  
3.675  
3.663  
2.212

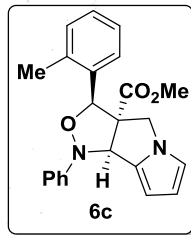

Current Data Parameters  
NAME J.S.II-1  
EXPNO 1  
PROCNO 1

F2 - Acquisition Parameters  
Date\_ 20101221  
Time 12.48  
INSTRUM spect  
PROBHD 5 mm DUL 13C-1  
PULPROG zg30  
TD 65536  
SOLVENT CDCl3  
NS 16  
DS 2  
SWH 6172.839 Hz  
FIDRES 0.094190 Hz  
AQ 5.3084660 sec  
RG 406.4  
DW 81.000 usec  
DE 6.00 usec  
TE 300.0 K  
D1 1.00000000 sec  
TD0 1

===== CHANNEL f1 =====  
NUC1 1H  
P1 13.15 usec  
PL1 0.00 dB  
SFO1 300.1318534 MHz

F2 - Processing parameters  
SI 32768  
SF 300.1300061 MHz  
WDW EM  
SSB 0  
LB 0.30 Hz  
GB 0  
PC 1.00

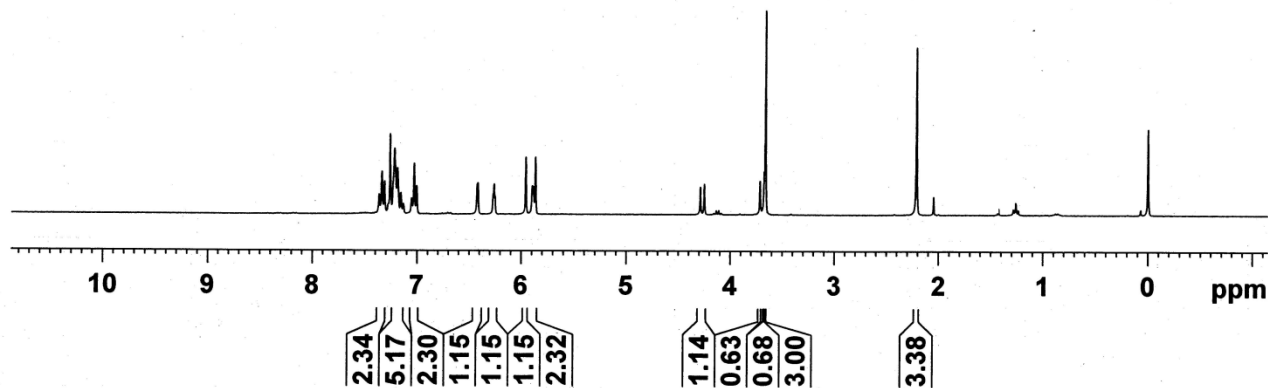

172.37  
148.85  
135.83  
133.06  
132.89  
130.72  
128.96  
128.61  
127.34  
126.21  
122.29  
115.12  
114.34  
113.93  
101.74  
82.53  
77.49  
77.07  
76.64  
73.63  
71.22  
53.02  
49.17  
  
19.41

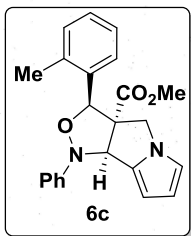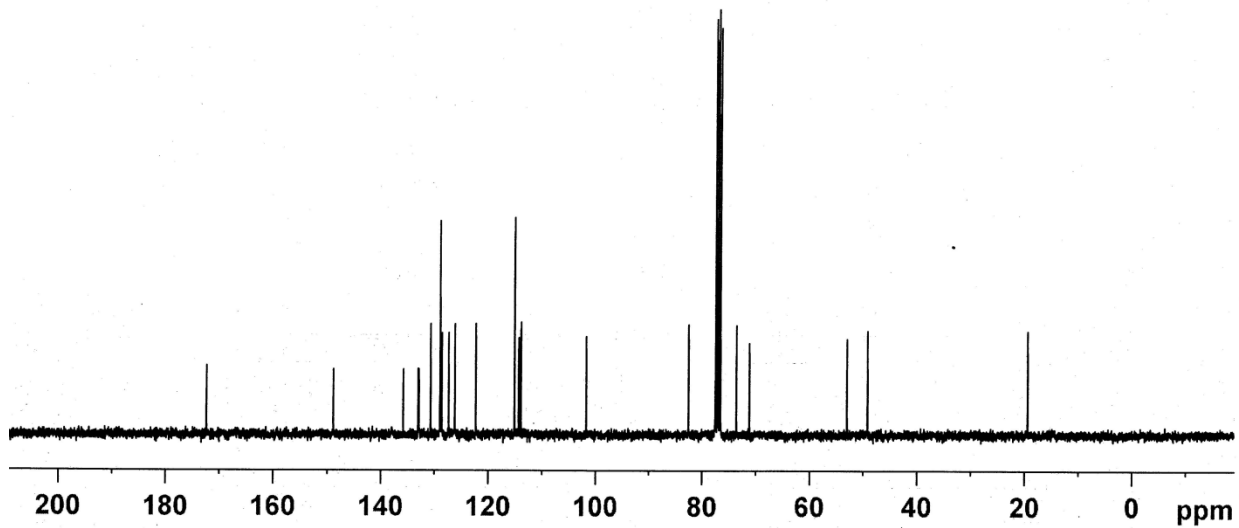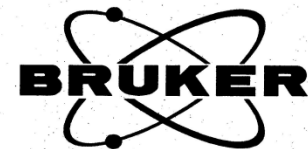

Current Data Parameters  
NAME JS-II-1  
EXPNO 1  
PROCNO 1

F2 - Acquisition Parameters  
Date\_ 20101221  
Time 15.57  
INSTRUM spect  
PROBHD 5 mm DUL 13C-1  
PULPROG zgpg30  
TD 65536  
SOLVENT CDCl3  
NS 208  
DS 4  
SWH 17985.611 Hz  
FIDRES 0.274439 Hz  
AQ 1.8219508 sec  
RG 645.1  
DW 27.800 usec  
DE 6.00 usec  
TE 300.0 K  
D1 2.0000000 sec  
d11 0.0300000 sec  
DELTA 1.89999998 sec  
TDO 1

===== CHANNEL f1 =====  
NUC1 13C  
P1 7.40 usec  
PL1 -2.00 dB  
SFO1 75.4752953 MHz

===== CHANNEL f2 =====  
CPDPRG2 waltz16  
NUC2 1H  
PCPD2 80.00 usec  
PL2 0.00 dB  
PL12 15.68 dB  
PL13 16.00 dB  
SFO2 300.1312005 MHz

F2 - Processing parameters  
SI 32768  
SF 75.4677490 MHz  
WDW EM  
SSB 0  
LB 1.00 Hz  
GB 0  
PC 1.40

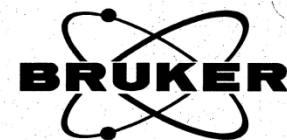

Current Data Parameters  
NAME J.S.II-2  
EXPNO 1  
PROCNO 1

F2 - Acquisition Parameters  
Date 20101221  
Time 12.56  
INSTRUM spect  
PROBHD 5 mm DUL 13C-1  
PULPROG zg30  
TD 65536  
SOLVENT CDCl3  
NS 16  
DS 2  
SWH 6172.839 Hz  
FIDRES 0.094190 Hz  
AQ 5.3084660 sec  
RG 512  
DW 81.000 usec  
DE 6.00 usec  
TE 300.0 K  
D1 1.00000000 sec  
TD0 1

==== CHANNEL f1 =====  
NUC1 1H  
P1 13.15 usec  
PL1 0.00 dB  
SFO1 300.1318534 MHz

F2 - Processing parameters  
SI 32768  
SF 300.1300056 MHz  
WDW EM  
SSB 0  
LB 0.30 Hz  
GB 0  
PC 1.00

7.358  
7.330  
7.305  
7.211  
7.187  
7.167  
7.106  
7.079  
6.445  
6.274  
6.264  
6.255  
5.917  
5.907  
5.827  
5.648  
4.128  
4.090  
3.816  
3.777  
3.729  
2.369

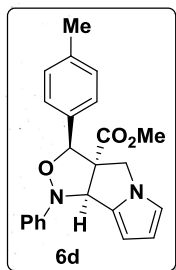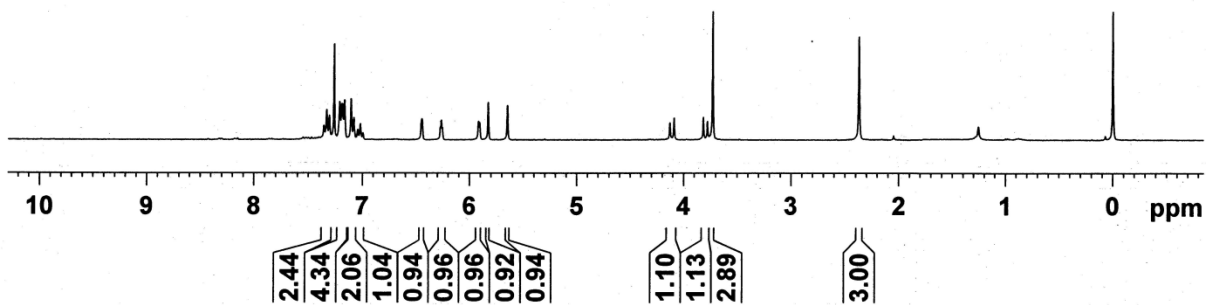



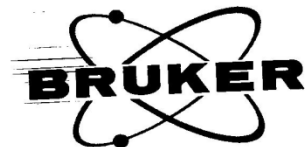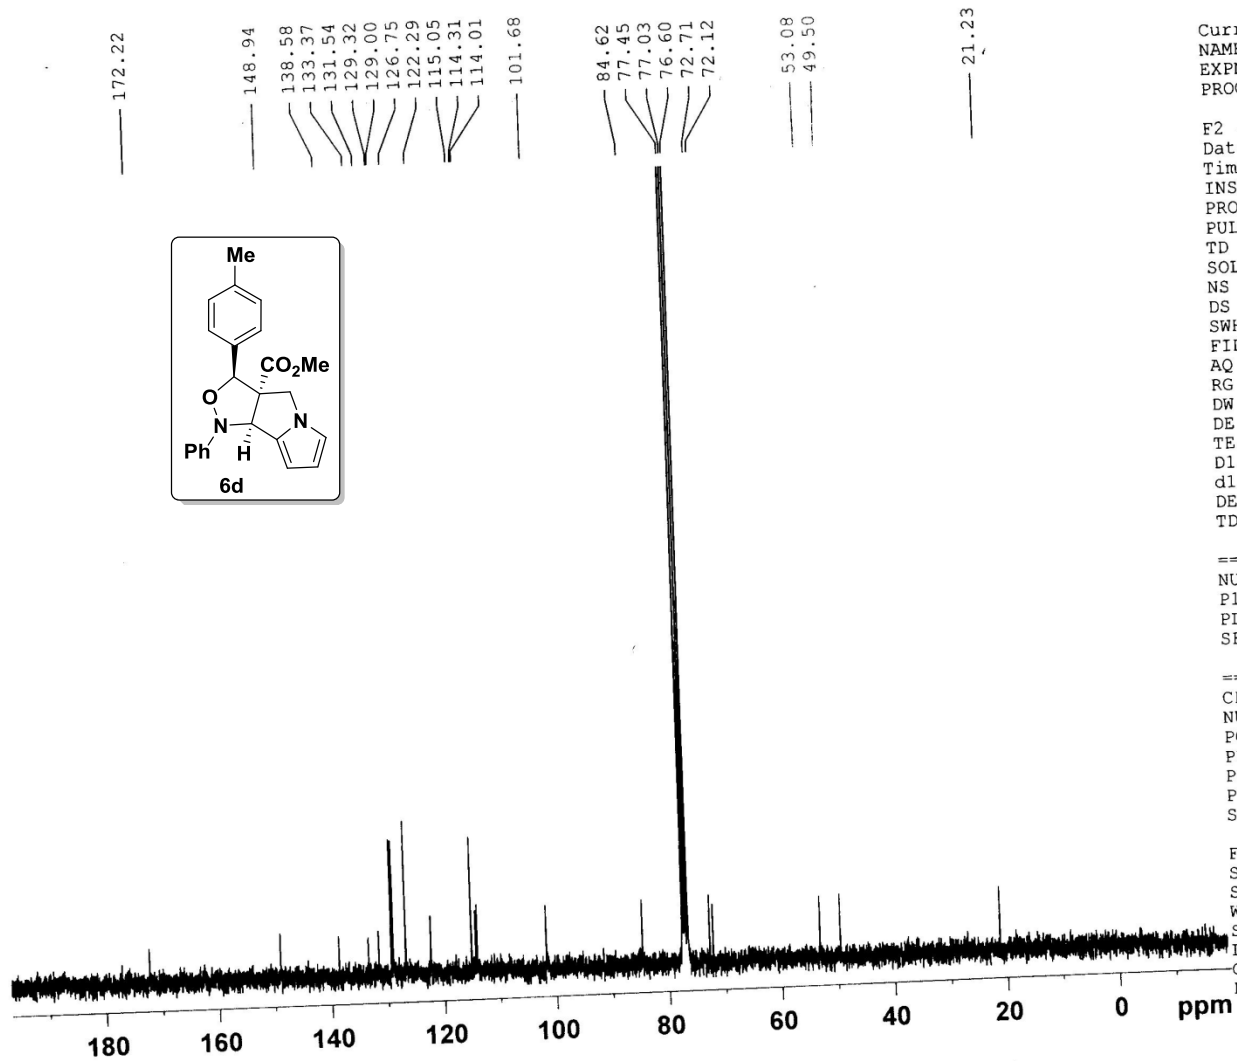

Current Data Parameters  
NAME JS-II-2  
EXPNO 2  
PROCNO 1

F2 - Acquisition Parameters  
Date\_ 20101222  
Time\_ 10.24  
INSTRUM spect  
PROBHD 5 mm DUL 13C-1  
PULPROG zgpg30  
TD 65536  
SOLVENT CDC13  
NS 500  
DS 4  
SWH 17985.611 Hz  
FIDRES 0.274439 Hz  
AQ 1.8219508 sec  
RG 645.1  
DW 27.800 usec  
DE 6.00 usec  
TE 300.0 K  
D1 2.00000000 sec  
d11 0.03000000 sec  
DELTA 1.89999998 sec  
TDO 1

==== CHANNEL f1 =====  
NUC1 13C  
P1 7.40 usec  
PL1 -2.00 dB  
SFO1 75.4752953 MHz

==== CHANNEL f2 =====  
CPDPRG2 waltz16  
NUC2 1H  
PCPD2 80.00 usec  
PL2 0.00 dB  
PL12 15.68 dB  
PL13 16.00 dB  
SFO2 300.1312005 MHz

F2 - Processing parameters  
SI 32768  
SF 75.4677490 MHz  
WDW EM  
SSB 0  
LB 1.00 Hz  
GB 0  
PC 1.40

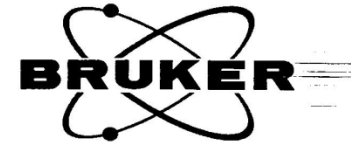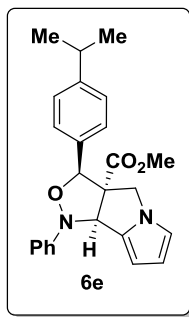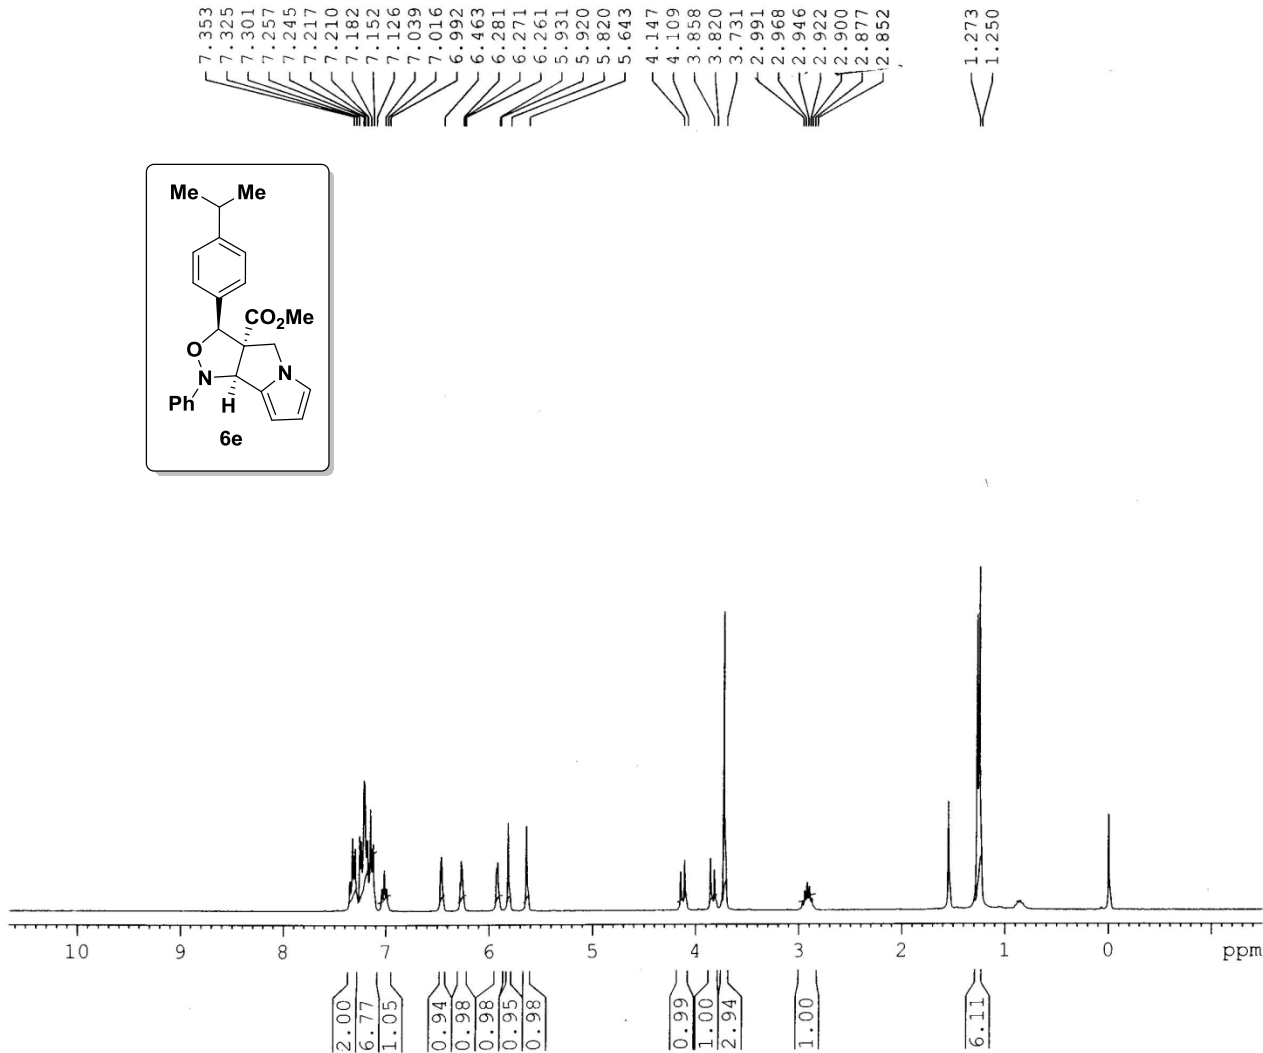

Current Data Parameters  
NAME J.S.II-7  
EXPNO 1  
PROCNO 1

F2 - Acquisition Parameters  
Date\_ 20101221  
Time 20.09  
INSTRUM spect  
PROBHD 5 mm DUL 13C-1  
PULPROG zg30  
TD 65536  
SOLVENT CDCl3  
NS 16  
DS 2  
SWH 6172.839 Hz  
FIDRES 0.094190 Hz  
AQ 5.3084660 sec  
RG 287.4  
DW 81.000 usec  
DE 6.00 usec  
TE 300.0 K  
D1 1.00000000 sec  
TD0 1

===== CHANNEL f1 =====  
NUC1 1H  
P1 13.15 usec  
PL1 0.00 dB  
SFO1 300.1318534 MHz

F2 - Processing parameters  
SI 32768  
SF 300.1300076 MHz  
WDW EM  
SSB 0  
LB 0.30 Hz  
GB 0  
PC 1.00

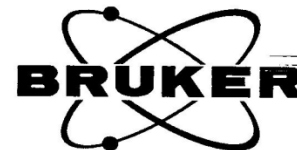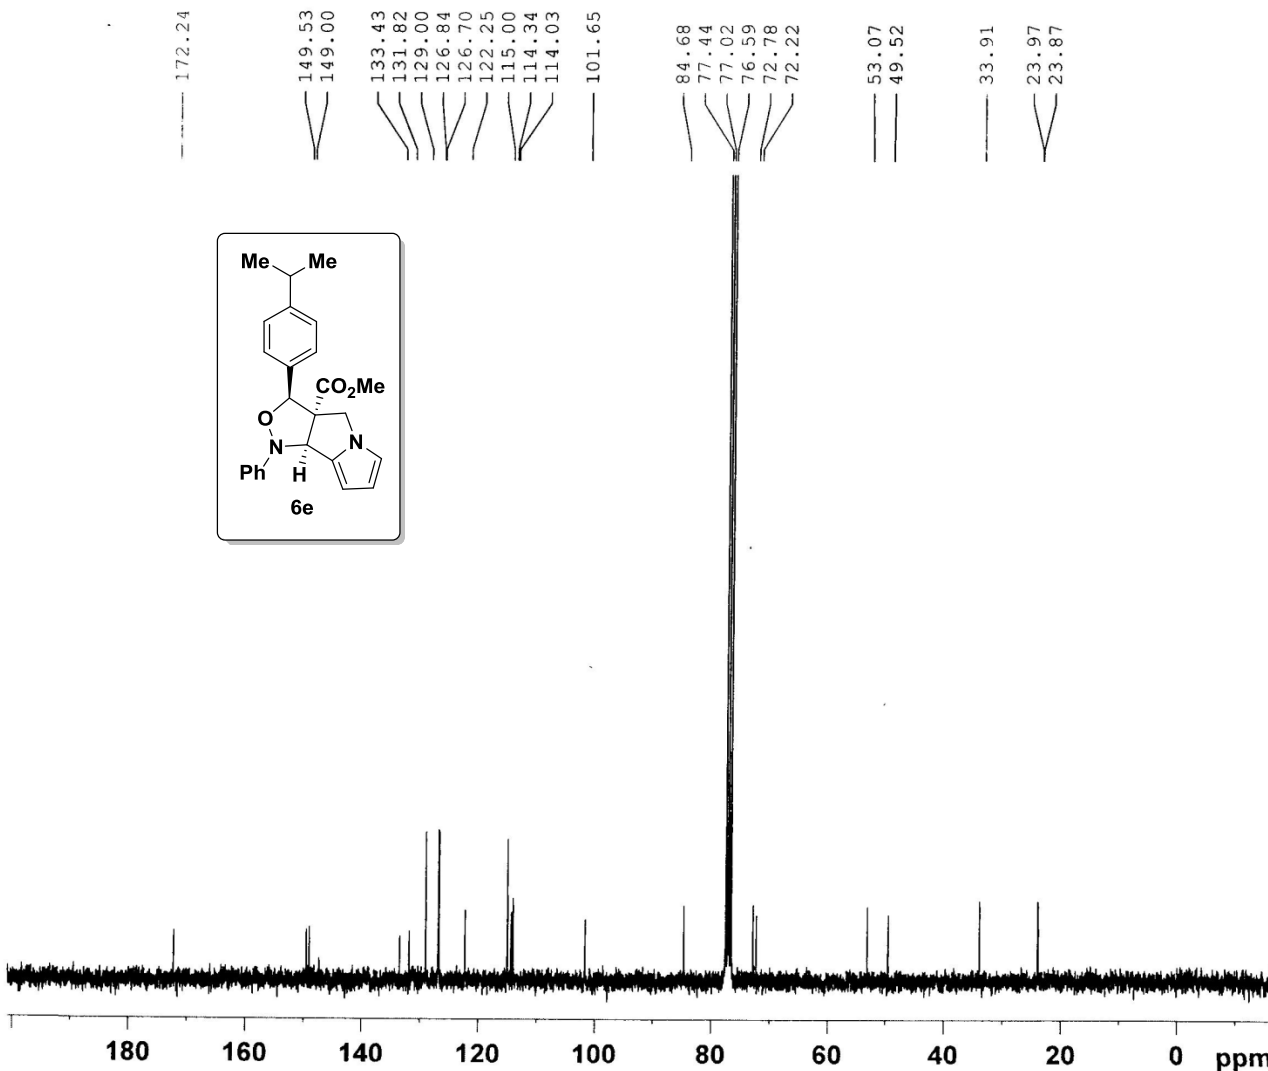

Current Data Parameters  
NAME J.S.II-7  
EXPNO 2  
PROCNO 1

F2 - Acquisition Parameters  
Date\_ 20101221  
Time 20.28  
INSTRUM spect  
PROBHD 5 mm DUL 13C-1  
PULPROG zgpg30  
TD 65536  
SOLVENT CDCl3  
NS 402  
DS 4  
SWH 17985.611 Hz  
FIDRES 0.274439 Hz  
AQ 1.8219508 sec  
RG 362  
DW 27.800 usec  
DE 6.00 usec  
TE 300.0 K  
D1 2.00000000 sec  
d11 0.03000000 sec  
DELTA 1.89999998 sec  
TDO 1

=====  
CHANNEL f1  
NUC1 13C  
P1 7.40 usec  
PL1 -2.00 dB  
SFO1 75.4752953 MHz

=====  
CHANNEL f2  
CPDPRG2 waltz16  
NUC2 1H  
PCPD2 80.00 usec  
PL2 0.00 dB  
PL12 15.68 dB  
PL13 16.00 dB  
SFO2 300.1312005 MHz

F2 - Processing parameters  
SI 32768  
SF 75.4677490 MHz  
WDW EM  
SSB 0  
LB 1.00 Hz  
GB 0  
PC 1.40

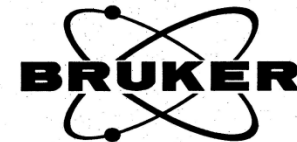

7.415  
7.390  
7.345  
7.321  
7.252  
7.217  
7.062  
7.039  
6.393  
6.250  
6.123  
5.922  
5.760  
4.447  
4.408  
3.667  
3.646  
3.636

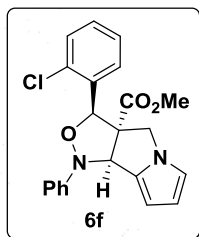

Current Data Parameters  
NAME JS-II-9-2-C1  
EXPNO 1  
PROCNO 1

F2 - Acquisition Parameters  
Date\_ 20101228  
Time 21.55  
INSTRUM spect  
PROBHD 5 mm DUL 13C-1  
PULPROG zg30  
TD 65536  
SOLVENT CDCl3  
NS 9  
DS 2  
SWH 6172.839 Hz  
FIDRES 0.094190 Hz  
AQ 5.3084660 sec  
RG 128  
DW 81.000 usec  
DE 6.00 usec  
TE 300.0 K  
D1 1.00000000 sec  
TD0 1

===== CHANNEL f1 =====  
NUC1 1H  
P1 13.15 usec  
PL1 0.00 dB  
SFO1 300.1318534 MHz

F2 - Processing parameters  
SI 32768  
SF 300.1300078 MHz  
WDW EM  
SSB 0  
LB 0.30 Hz  
GB 0  
PC 1.00

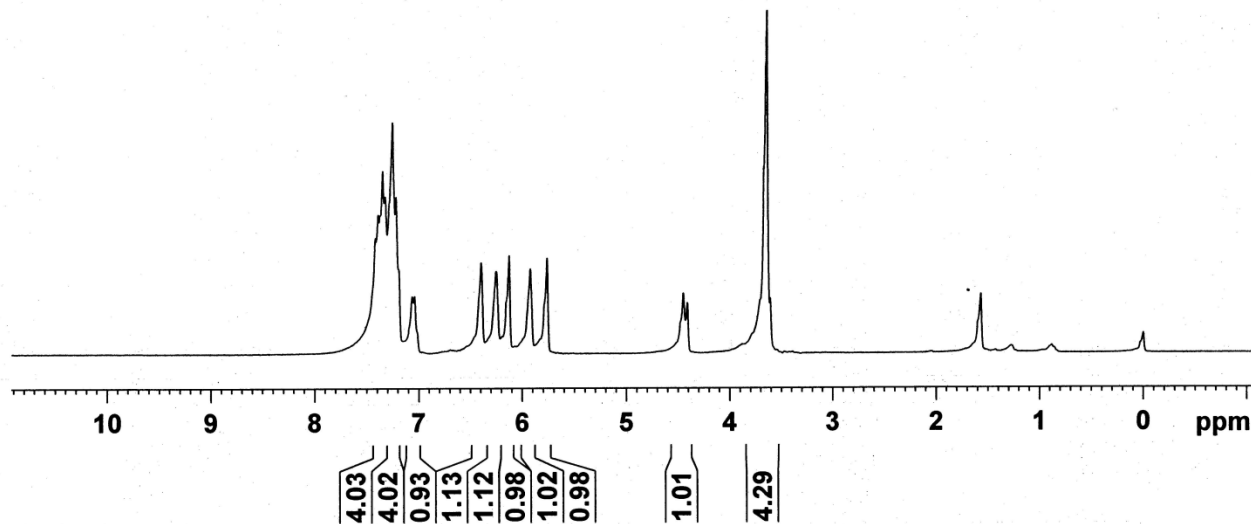

171.78  
148.90  
133.28  
132.66  
132.61  
129.85  
129.57  
128.97  
128.69  
127.13  
122.43  
115.08  
114.41  
113.92  
101.81  
82.67  
77.47  
77.05  
76.62  
74.25  
71.39  
53.08  
48.74

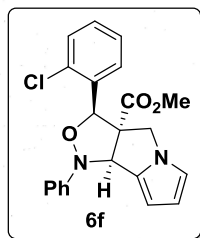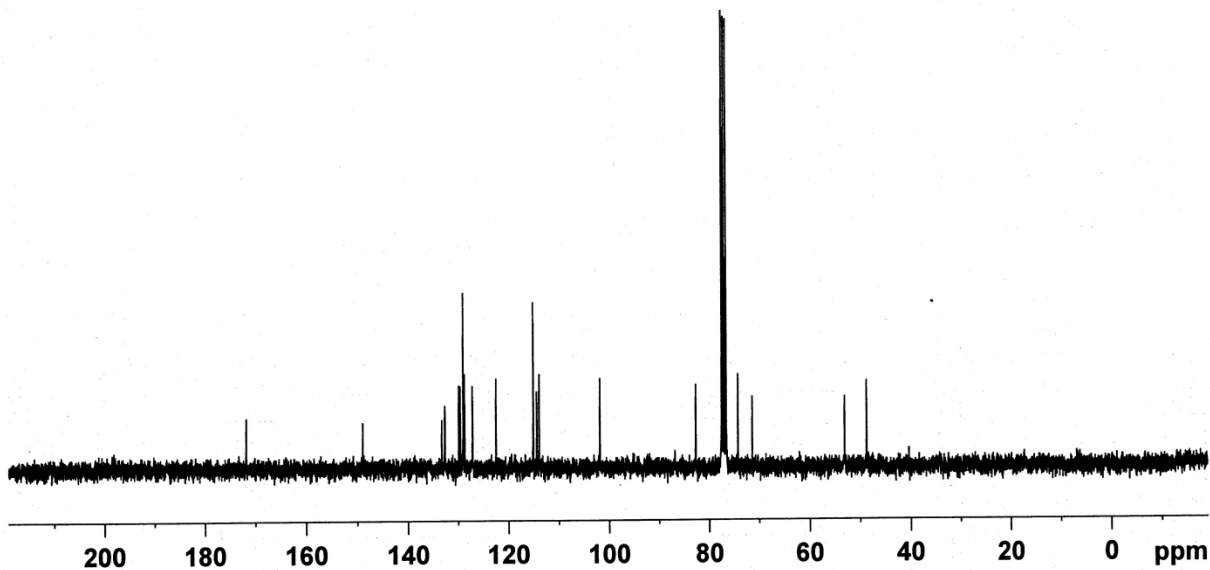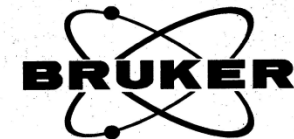

Current Data Parameters  
NAME JS-II-9-2-C1  
EXPNO 2  
PROCNO 1

F2 - Acquisition Parameters  
Date\_ 20101228  
Time 22.00  
INSTRUM spect  
PROBHD 5 mm DUL 13C-1  
PULPROG zgpg30  
TD 65536  
SOLVENT CDC13  
NS 151  
DS 4  
SWH 17985.611 Hz  
FIDRES 0.274439 Hz  
AQ 1.8219508 sec  
RG 645.1  
DW 27.800 usec  
DE 6.00 usec  
TE 300.0 K  
D1 2.0000000 sec  
d11 0.0300000 sec  
DELTA 1.89999998 sec  
TD0 1

===== CHANNEL f1 =====  
NUC1 13C  
P1 7.40 usec  
PL1 -2.00 dB  
SFO1 75.4752953 MHz

===== CHANNEL f2 =====  
CPDPRG2 waltz16  
NUC2 1H  
PCPD2 80.00 usec  
PL2 0.00 dB  
PL12 15.68 dB  
PL13 16.00 dB  
SFO2 300.1312005 MHz

F2 - Processing parameters  
SI 32768  
SF 75.4677490 MHz  
WDW EM  
SSB 0  
LB 1.00 Hz  
GB 0  
PC 1.40

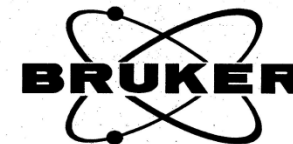

Current Data Parameters  
NAME JS-II-83-C1  
EXPNO 1  
PROCNO 1

F2 - Acquisition Parameters  
Date\_ 20101228  
Time\_ 21.35  
INSTRUM spect  
PROBHD 5 mm DUL 13C-1  
PULPROG zg30  
TD 65536  
SOLVENT CDC13  
NS 16  
DS 2  
SWH 6172.839 Hz  
FIDRES 0.094190 Hz  
AQ 5.3084660 sec  
RG 114  
DW 81.000 usec  
DE 6.00 usec  
TE 300.0 K  
D1 1.0000000 sec  
TD0 1

===== CHANNEL f1 =====  
NUC1 1H  
P1 13.15 usec  
PL1 0.00 dB  
SFO1 300.1318534 MHz

F2 - Processing parameters  
SI 32768  
SF 300.1300101 MHz  
WDW EM  
SSB 0  
LB 0.30 Hz  
GB 0  
PC 1.00

7.310  
7.295  
7.269  
7.247  
7.220  
7.199  
7.171  
7.100  
7.076  
7.059  
7.056  
7.033  
7.010  
7.008  
6.446  
6.441  
6.437  
6.278  
6.268  
6.258  
5.914  
5.903  
5.840  
5.673  
4.134  
4.096  
3.737  
3.697

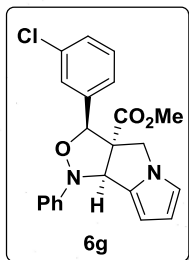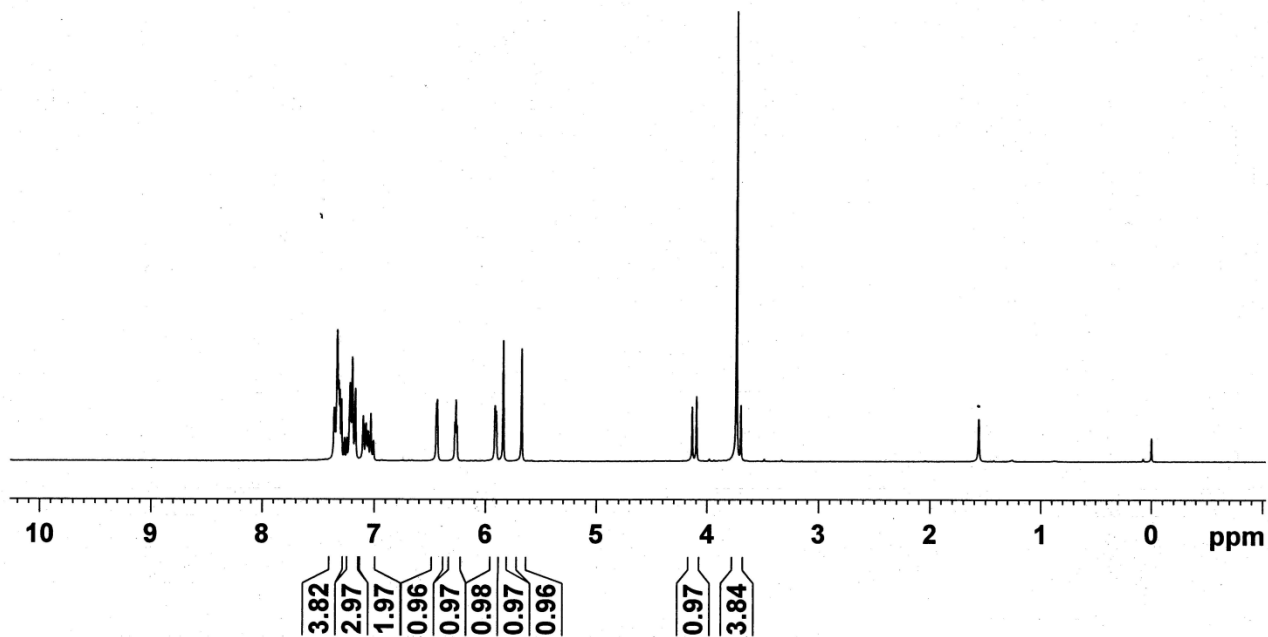

171.93  
148.62  
136.83  
134.77  
133.02  
129.95  
129.07  
128.95  
127.09  
124.98  
122.58  
115.14  
114.38  
114.24  
101.96  
83.65  
77.47  
77.05  
76.63  
72.69  
71.97  
53.23  
49.66

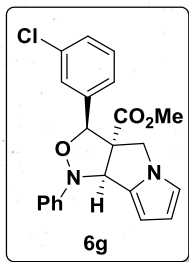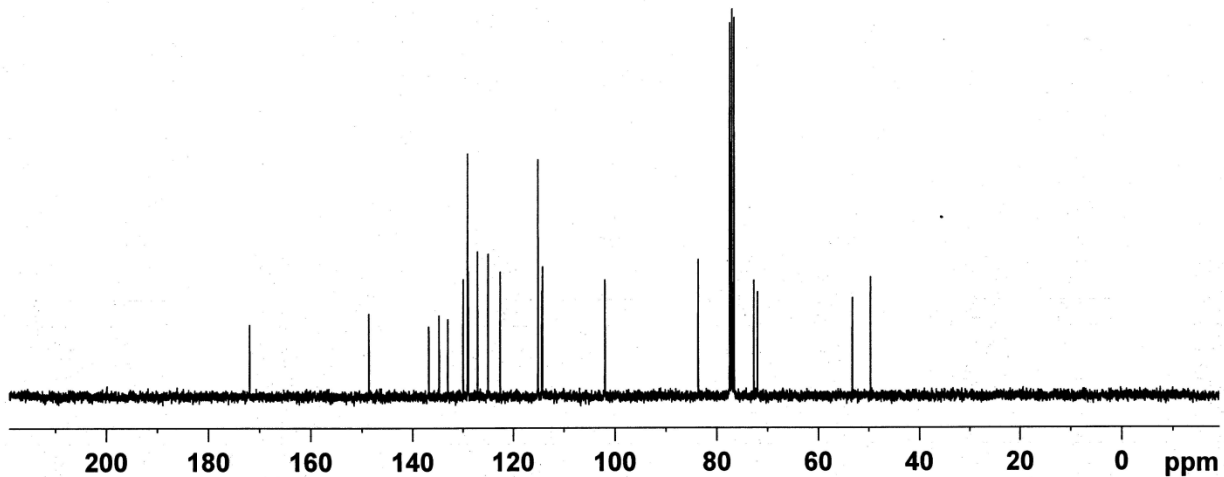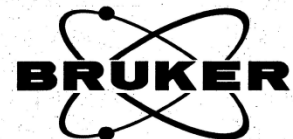

Current Data Parameters  
NAME JS-II-83-C1  
EXPNO 2  
PROCNO 1

F2 - Acquisition Parameters  
Date\_ 20101228  
Time\_ 21.48  
INSTRUM spect  
PROBHD 5 mm DUL 13C-1  
PULPROG zgpg30  
TD 65536  
SOLVENT CDC13  
NS 207  
DS 4  
SWH 17985.611 Hz  
FIDRES 0.274439 Hz  
AQ 1.8219508 sec  
RG 645.1  
DW 27.800 usec  
DE 6.00 usec  
TE 300.0 K  
D1 2.00000000 sec  
d11 0.03000000 sec  
DELTA 1.89999998 sec  
TDO 1

===== CHANNEL f1 =====  
NUC1 13C  
P1 7.40 usec  
PL1 -2.00 dB  
SFO1 75.4752953 MHz

===== CHANNEL f2 =====  
CPDPRG2 waltz16  
NUC2 1H  
PCPD2 80.00 usec  
PL2 0.00 dB  
PL12 15.68 dB  
PL13 16.00 dB  
SFO2 300.1312005 MHz

F2 - Processing parameters  
SI 32768  
SF 75.4677490 MHz  
WDW EM  
SSB 0  
LB 1.00 Hz  
GB 0  
PC 1.40

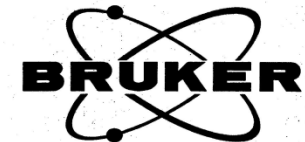

7.355  
7.327  
7.303  
7.242  
7.195  
7.169  
7.150  
7.122  
7.052  
7.027  
7.003  
6.428  
6.425  
6.421  
6.266  
6.256  
6.245  
5.900  
5.889  
5.854  
5.664  
4.100  
4.062  
3.721  
3.704  
3.665

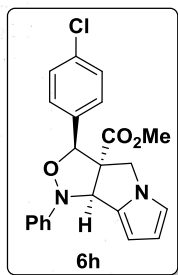

Current Data Parameters  
NAME JSI-II-10  
EXPNO 1  
PROCNO 1

F2 - Acquisition Parameters  
Date\_ 20101229  
Time 15.04  
INSTRUM spect  
PROBHD 5 mm DUL 13C-1  
PULPROG zg30  
TD 65536  
SOLVENT CDCl3  
NS 16  
DS 2  
SWH 6172.839 Hz  
FIDRES 0.094190 Hz  
AQ 5.3084660 sec  
RG 90.5  
DW 81.000 usec  
DE 6.00 usec  
TE 300.0 K  
D1 1.00000000 sec  
TD0 1

===== CHANNEL f1 =====  
NUC1 1H  
P1 13.15 usec  
PL1 0.00 dB  
SFO1 300.1318534 MHz

F2 - Processing parameters  
SI 32768  
SF 300.1300114 MHz  
WDW EM  
SSB 0  
LB 0.30 Hz  
GB 0  
PC 1.00

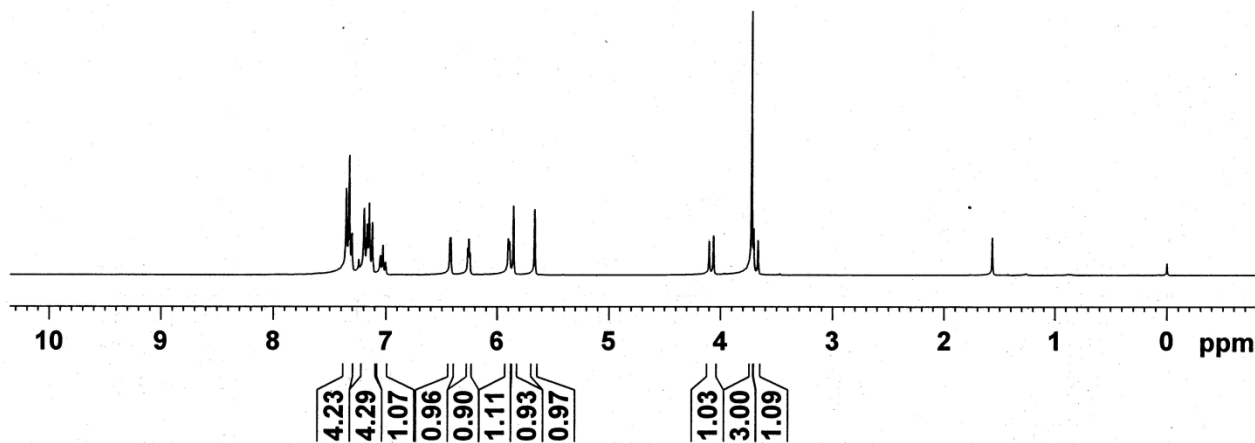



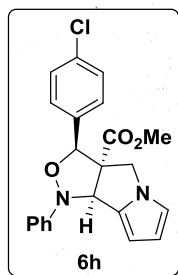

171.99  
 148.63  
 134.69  
 133.28  
 133.13  
 129.06  
 128.89  
 128.32  
 122.56  
 115.15  
 114.35  
 114.20  
 101.93  
 83.81  
 77.49  
 77.07  
 76.64  
 72.53  
 71.88  
 53.19  
 49.65

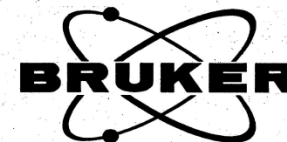

Current Data Parameters  
 NAME JSI-II-10  
 EXPNO 2  
 PROCNO 1

F2 - Acquisition Parameters  
 Date\_ 20101229  
 Time 15.10  
 INSTRUM spect  
 PROBHD 5 mm DUL 13C-1  
 PULPROG zgpg30  
 TD 65536  
 SOLVENT CDCl3  
 NS 150  
 DS 4  
 SWH 17985.611 Hz  
 FIDRES 0.274439 Hz  
 AQ 1.8219508 sec  
 RG 362  
 DW 27.800 usec  
 DE 6.00 usec  
 TE 300.0 K  
 D1 2.0000000 sec  
 d11 0.0300000 sec  
 DELTA 1.89999998 sec  
 TD0 1

===== CHANNEL f1 =====  
 NUC1 13C  
 P1 7.40 usec  
 PL1 -2.00 dB  
 SFO1 75.4752953 MHz

===== CHANNEL f2 =====  
 CPDPRG2 waltz16  
 NUC2 1H  
 PCPD2 80.00 usec  
 PL2 0.00 dB  
 PL12 15.68 dB  
 PL13 16.00 dB  
 SFO2 300.1312005 MHz

F2 - Processing parameters  
 SI 32768  
 SF 75.4677490 MHz  
 WDW EM  
 SSB 0  
 LB 1.00 Hz  
 GB 0  
 PC 1.40

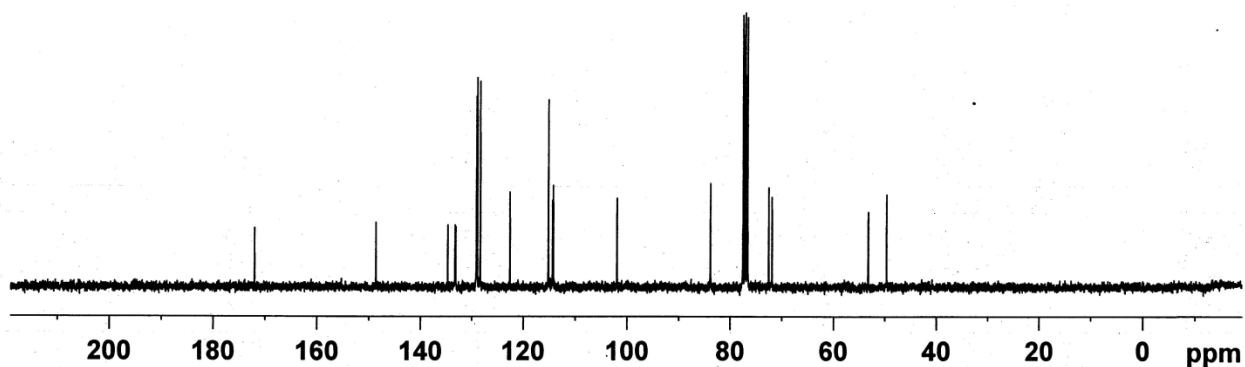

7.487  
7.462  
7.360  
7.334  
7.308  
7.255  
7.206  
7.180  
7.029  
7.004  
6.985  
6.979  
6.884  
6.857  
6.442  
6.249  
6.239  
6.230  
5.933  
5.922  
5.890  
5.657  
4.489  
4.450  
3.751  
3.711  
3.700  
3.687

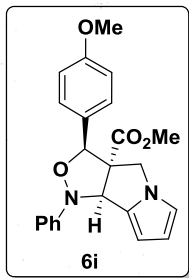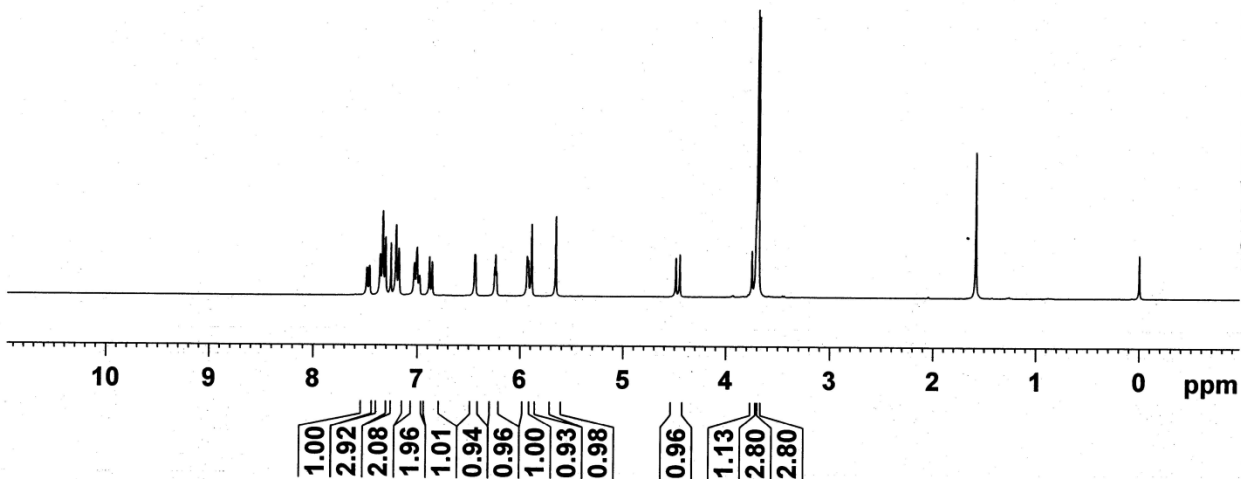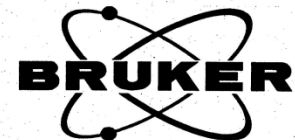

Current Data Parameters  
NAME JS-II-12  
EXPNO 1  
PROCNO 1

F2 - Acquisition Parameters  
Date\_ 20121107  
Time\_ 0.46  
INSTRUM spect  
PROBHD 5 mm DUL 13C-1  
PULPROG zg30  
TD 65536  
SOLVENT CDCl3  
NS 16  
DS 2  
SWH 6172.839 Hz  
FIDRES 0.094190 Hz  
AQ 5.3084660 sec  
RG 161.3  
DW 81.000 usec  
DE 6.00 usec  
TE 300.0 K  
D1 1.0000000 sec  
TDO 1

===== CHANNEL f1 =====  
NUC1 1H  
P1 13.15 usec  
PL1 0.00 dB  
SFO1 300.1318534 MHz

F2 - Processing parameters  
SI 32768  
SF 300.1300082 MHz  
WDW EM  
SSB 0  
LB 0.30 Hz  
GB 0  
PC 1.00

172.31  
155.62  
149.46  
133.08  
129.42  
128.96  
127.20  
123.63  
121.99  
120.92  
114.71  
114.53  
113.87  
109.95  
101.35  
82.11  
77.46  
77.03  
76.61  
74.60  
71.95  
55.09  
52.76  
48.12

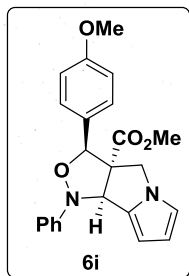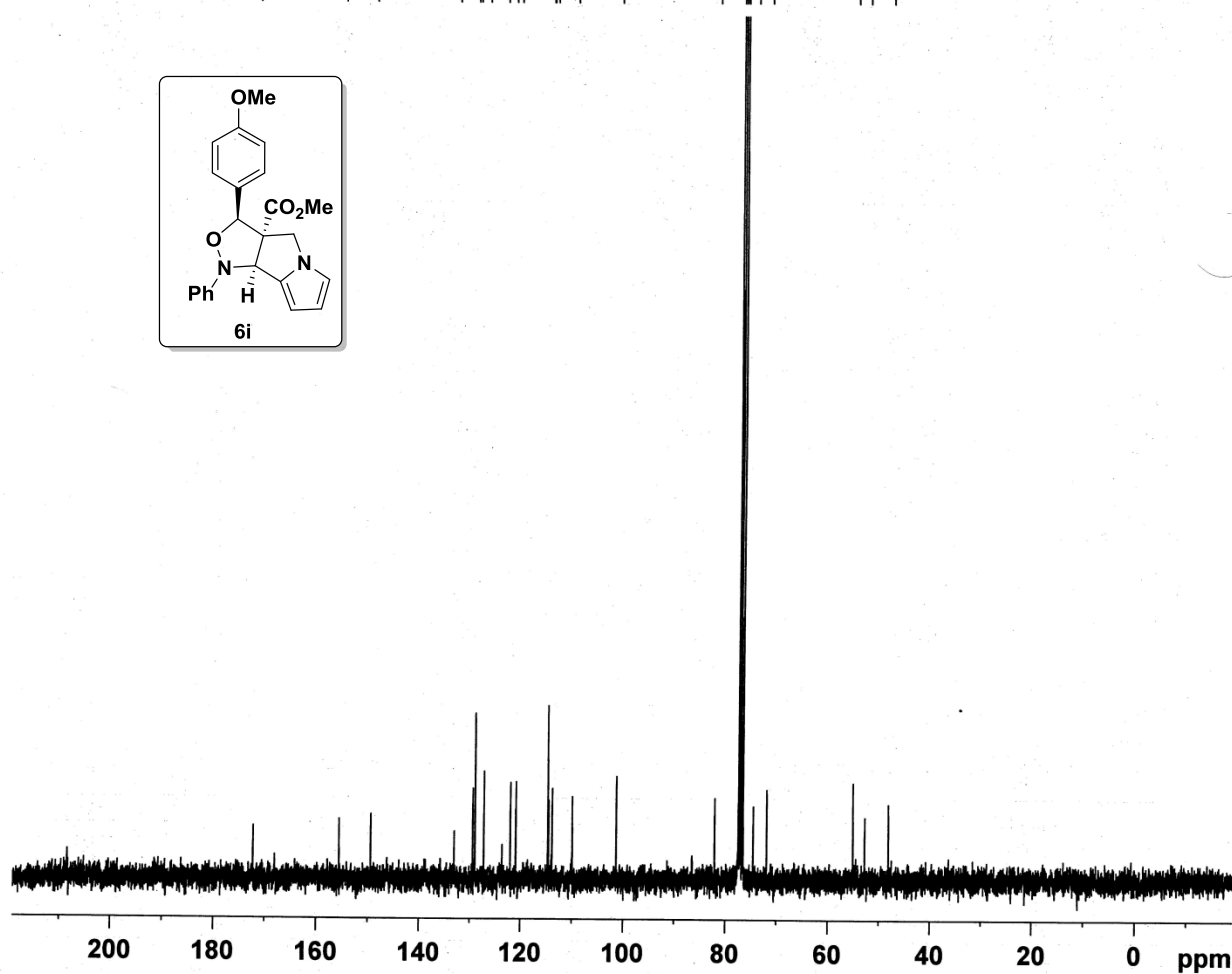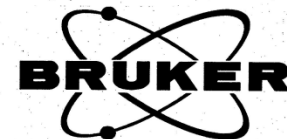

Current Data Parameters  
NAME JS-II-12  
EXPNO 2  
PROCNO 1

F2 - Acquisition Parameters  
Date\_ 20121107  
Time\_ 0.49  
INSTRUM spect  
PROBHD 5 mm DUL 13C-1  
PULPROG zgpg30  
TD 65536  
SOLVENT CDC13  
NS 100  
DS 4  
SWH 17985.611 Hz  
FIDRES 0.274439 Hz  
AQ 1.8219508 sec  
RG 2298.8  
DW 27.800 usec  
DE 6.00 usec  
TE 300.0 K  
D1 2.00000000 sec  
d11 0.03000000 sec  
DELTA 1.89999998 sec  
TD0 1

===== CHANNEL f1 =====  
NUC1 13C  
P1 9.30 usec  
PL1 0.00 dB  
SFO1 75.4752953 MHz

===== CHANNEL f2 =====  
CPDPRG2 waltz16  
NUC2 1H  
PCPD2 80.00 usec  
PL2 0.00 dB  
PL12 15.68 dB  
PL13 16.00 dB  
SFO2 300.1312005 MHz

F2 - Processing parameters  
SI 32768  
SF 75.4677490 MHz  
WDW EM  
SSB 0  
LB 1.00 Hz  
GB 0  
PC 1.40

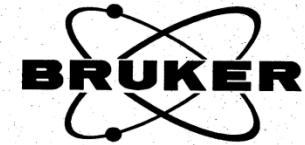

Current Data Parameters  
NAME JS-II-11  
EXPNO 2  
PROCNO 1

F2 - Acquisition Parameters  
Date\_ 20121107  
Time\_ 10.35  
INSTRUM spect  
PROBHD 5 mm DUL 13C-1  
PULPROG zg30  
TD 65536  
SOLVENT CDC13  
NS 12  
DS 2  
SWH 6172.839 Hz  
FIDRES 0.094190 Hz  
AQ 5.3084660 sec  
RG 181  
DW 81.000 usec  
DE 6.00 usec  
TE 300.0 K  
D1 1.00000000 sec  
TD0 1

===== CHANNEL f1 =====  
NUC1 1H  
P1 13.15 usec  
PL1 0.00 dB  
SFO1 300.1318534 MHz

F2 - Processing parameters  
SI 32768  
SF 300.1300084 MHz  
WDW EM  
SSB 0  
LB 0.30 Hz  
GB 0  
PC 1.00

7.327  
7.253  
7.196  
7.040  
7.022  
6.811  
6.789  
6.717  
6.647  
6.461  
6.265  
5.981  
5.891  
5.826  
5.602  
4.131  
4.094  
3.841  
3.803  
3.718

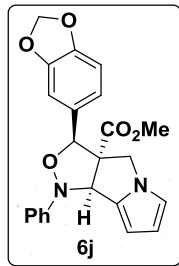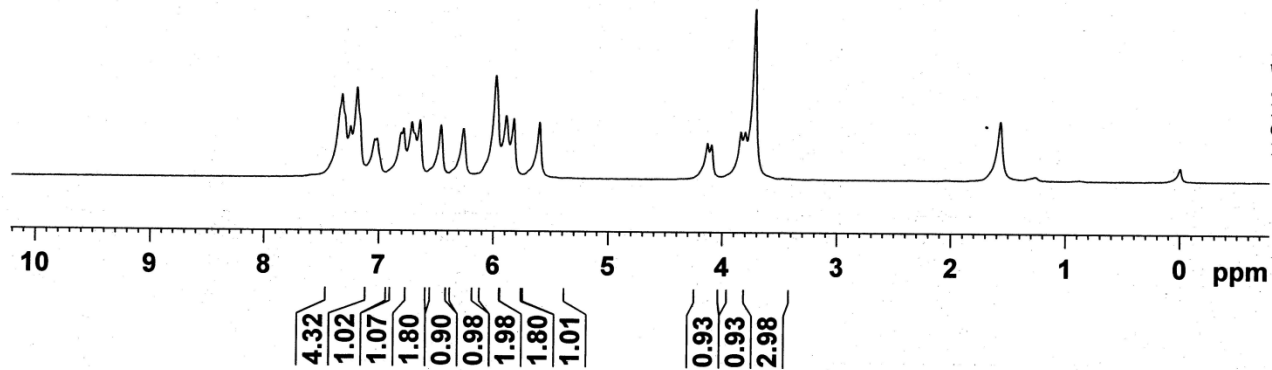

172.15  
148.80  
147.95  
133.24  
129.00  
128.28  
122.39  
120.56  
115.12  
114.31  
114.10  
108.41  
107.37  
101.79  
101.25  
84.41  
77.45  
77.03  
76.60  
72.55  
71.98  
53.08  
49.58

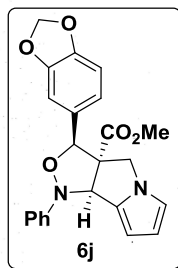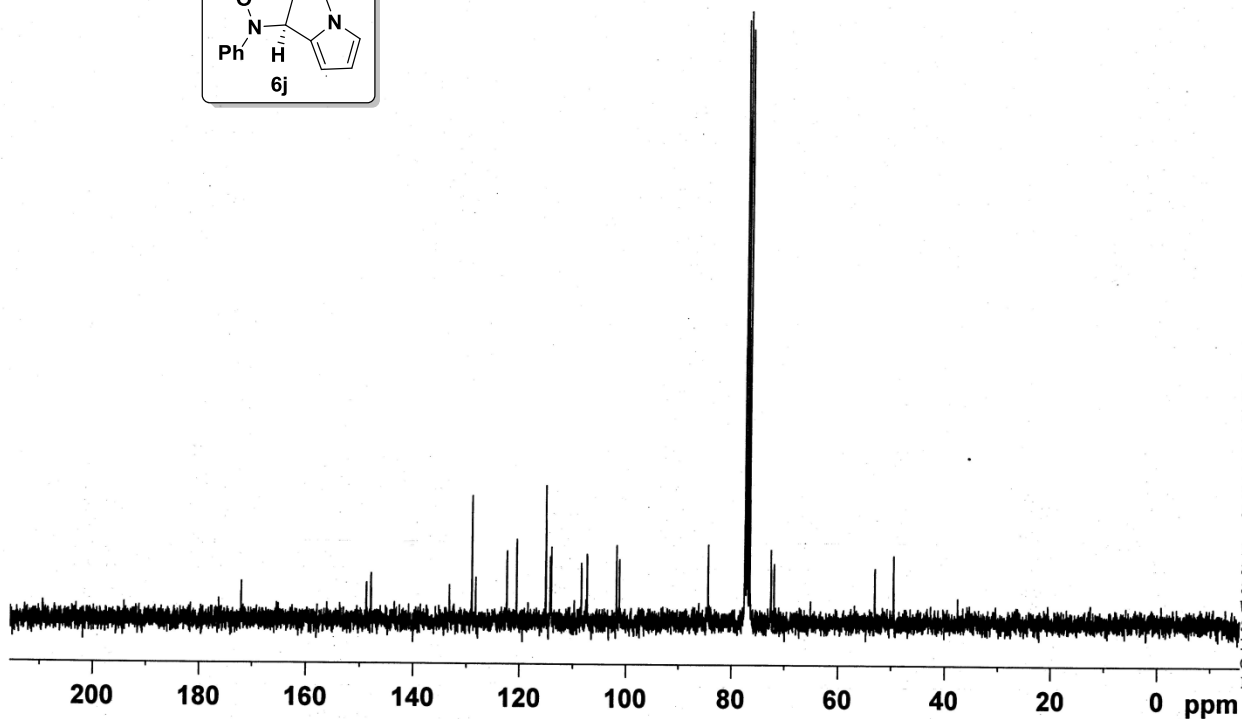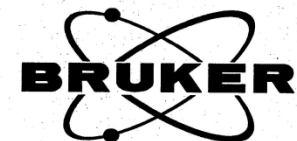

Current Data Parameters  
NAME JS-II-11  
EXPNO 3  
PROCNO 1

F2 - Acquisition Parameters  
Date 20121107  
Time 10.41  
INSTRUM spect  
PROBHD 5 mm DUL 13C-1  
PULPROG zgpg30  
TD 65536  
SOLVENT CDCl3  
NS 223  
DS 4  
SWH 17985.611 Hz  
FIDRES 0.274439 Hz  
AQ 1.8219508 sec  
RG 912.3  
DW 27.800 usec  
DE 6.00 usec  
TE 300.0 K  
D1 2.00000000 sec  
d11 0.03000000 sec  
DELTA 1.89999998 sec  
TDO 1

===== CHANNEL f1 =====  
NUC1 13C  
P1 9.30 usec  
PL1 0.00 dB  
SFO1 75.4752953 MHz

===== CHANNEL f2 =====  
CPDPRG2 waltz16  
NUC2 1H  
PCPD2 80.00 usec  
PL2 0.00 dB  
PL12 15.68 dB  
PL13 16.00 dB  
SFO2 300.1312005 MHz

F2 - Processing parameters  
SI 32768  
SF 75.4677490 MHz  
WDW EM  
SSB 0  
LB 1.00 Hz  
GB 0  
PC 1.40

7.377  
7.371  
7.364  
7.355  
7.329  
7.325  
7.300  
7.253  
7.223  
7.220  
7.212  
7.198  
7.017  
6.440  
6.436  
6.432  
6.289  
6.279  
5.969  
5.958  
5.854  
5.708  
4.155  
4.131  
4.116  
4.109  
4.087  
3.753  
3.714  
1.507  
1.485  
1.458  
1.257  
1.233  
1.208  
1.183  
0.888  
0.864  
0.840

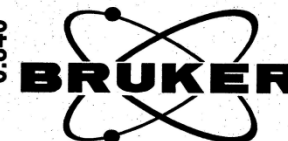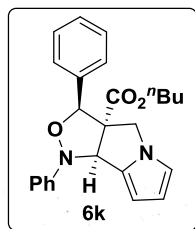

Current Data Parameters  
NAME JS-IV-82  
EXPNO 1  
PROCNO 1

F2 - Acquisition Parameters  
Date 20130327  
Time 18.40  
INSTRUM spect  
PROBHD 5 mm DUL 13C-1  
PULPROG zg30  
TD 65536  
SOLVENT CDC13  
NS 16  
DS 2  
SWH 6172.839 Hz  
FIDRES 0.094190 Hz  
AQ 5.3084660 sec  
RG 128  
DW 81.000 usec  
DE 6.00 usec  
TE 300.0 K  
D1 1.00000000 sec  
TD0 1

===== CHANNEL f1 =====  
NUC1 1H  
P1 13.15 usec  
PL1 0.00 dB  
SFO1 300.1318534 MHz

F2 - Processing parameters  
SI 32768  
SF 300.130084 MHz  
WDW EM  
SSB 0  
LB 0.30 Hz  
GB 0  
PC 1.00

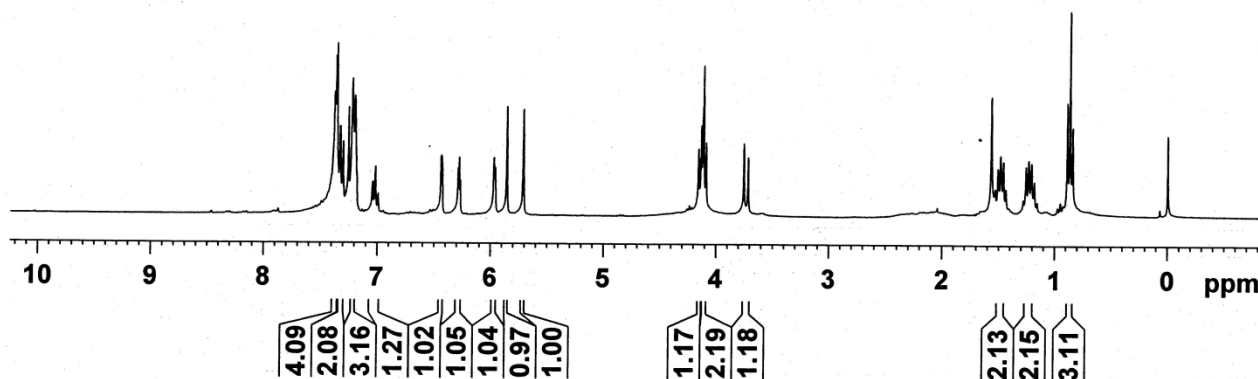

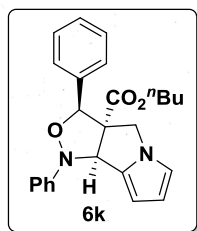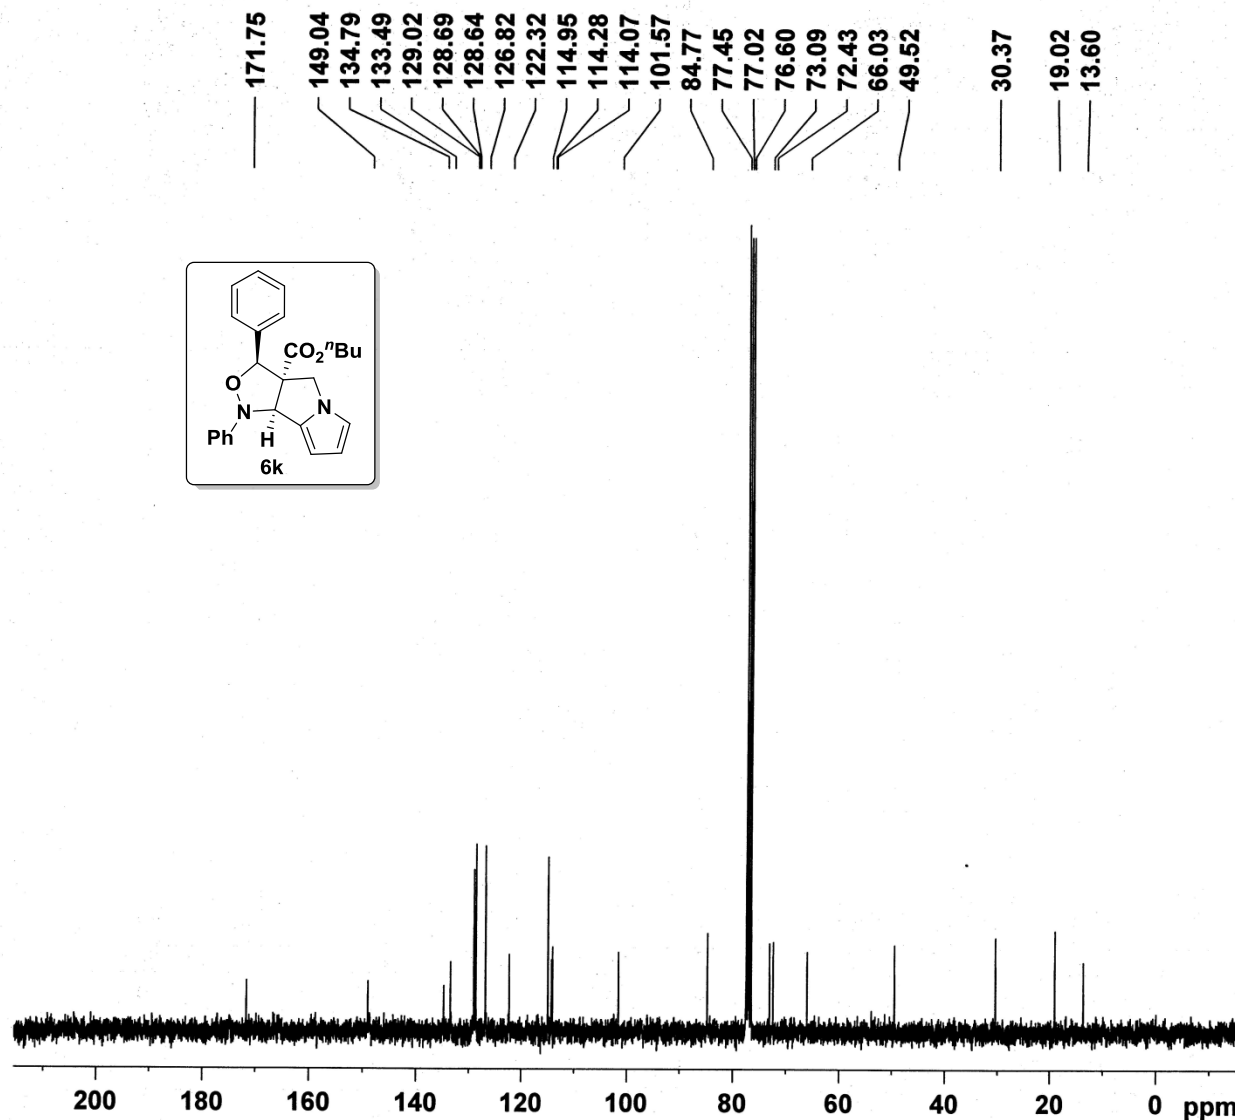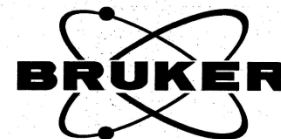

Current Data Parameters  
NAME JS-IV-82  
EXPNO 2  
PROCNO 1

F2 - Acquisition Parameters

Date\_ 20130327  
Time 18.52  
INSTRUM spect  
PROBHD 5 mm DUL 13C-1  
PULPROG zgpg30  
TD 65536  
SOLVENT CDCl3  
NS 201  
DS 4  
SWH 17985.611 Hz  
FIDRES 0.274439 Hz  
AQ 1.8219508 sec  
RG 1448.2  
DW 27.800 usec  
DE 6.00 usec  
TE 300.0 K  
D1 2.00000000 sec  
d11 0.03000000 sec  
DELTA 1.89999998 sec  
TDO 1

===== CHANNEL f1 =====

NUC1 13C  
P1 9.30 usec  
PL1 0.00 dB  
SFO1 75.4752953 MHz

===== CHANNEL f2 =====

CPDPRG2 waltz16  
NUC2 1H  
PCPD2 80.00 usec  
PL2 0.00 dB  
PL12 15.68 dB  
PL13 16.00 dB  
SFO2 300.1312005 MHz

F2 - Processing parameters

SI 32768  
SF 75.4677490 MHz  
WDW EM  
SSB 0  
LB 1.00 Hz  
GB 0  
PC 1.40

PROTON CDC13 {D:\MB} KOPAL 1

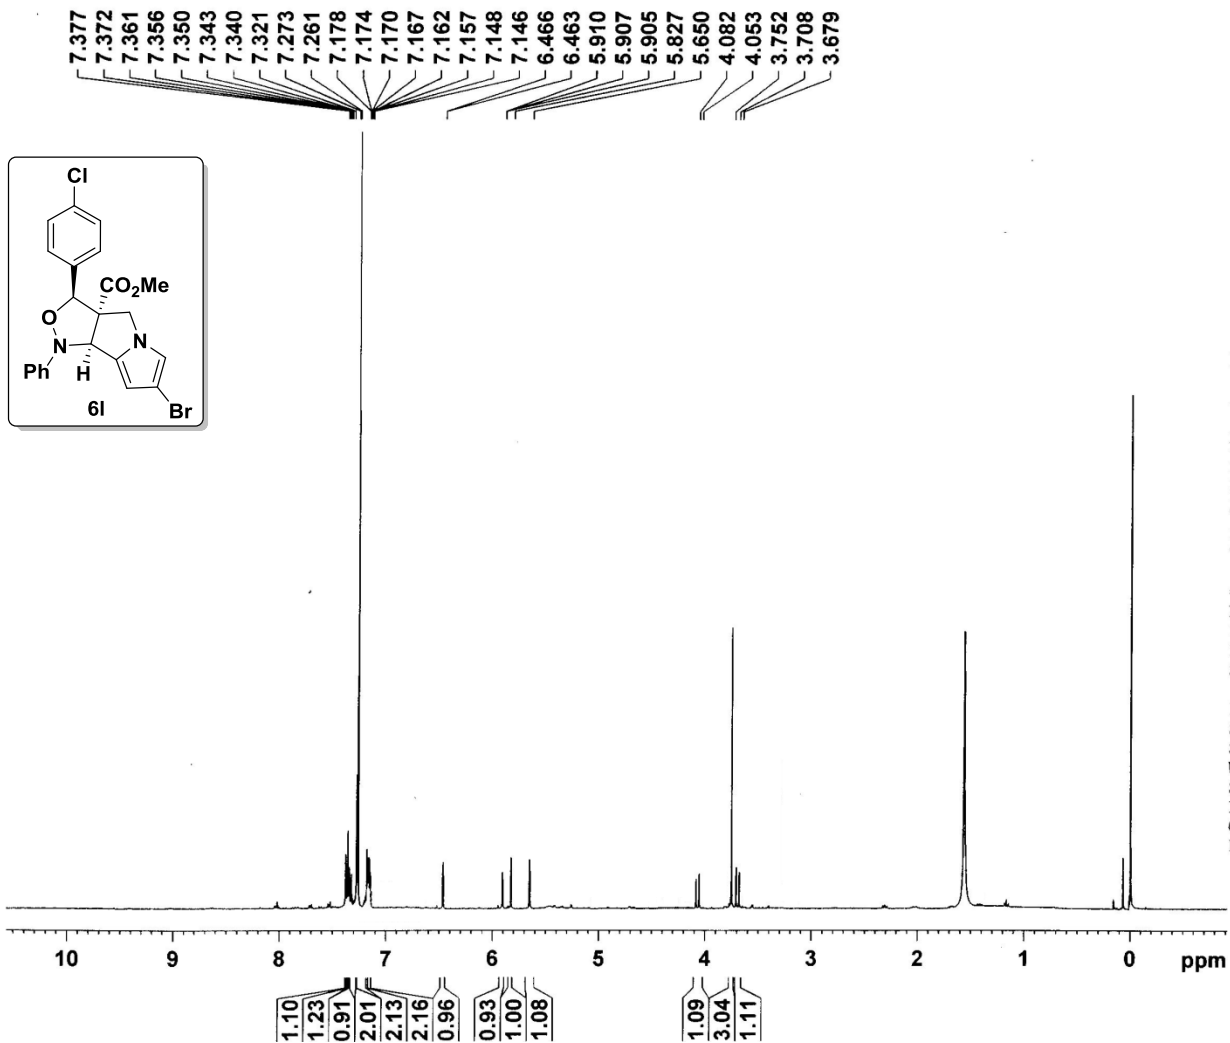

Current Data Parameters  
NAME VA-JS-08-1  
EXPNO 1  
PROCNO 1

F2 - Acquisition Parameters  
Date\_ 20150706  
Time 11.31  
INSTRUM spect  
PROBHD 5 mm DUL 13C-1  
PULPROG zg30  
TD 65536  
SOLVENT CDC13  
NS 16  
DS 2  
SWH 8223.685 Hz  
FIDRES 0.125483 Hz  
AQ 3.9846387 sec  
RG 287  
DW 60.800 usec  
DE 6.00 usec  
TE 296.2 K  
D1 1.00000000 sec  
TD0 1

===== CHANNEL f1 =====  
NUC1 1H  
P1 11.42 usec  
PL1 -3.00 dB  
SFO1 400.1324710 MHz

F2 - Processing parameters  
SI 32768  
SF 400.1300049 MHz  
WDW EM  
SSB 0  
LB 0.30 Hz  
GB 0  
PC 1.00



C13CPD CDC13 {D:\MB} KOPAL 1

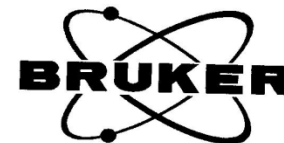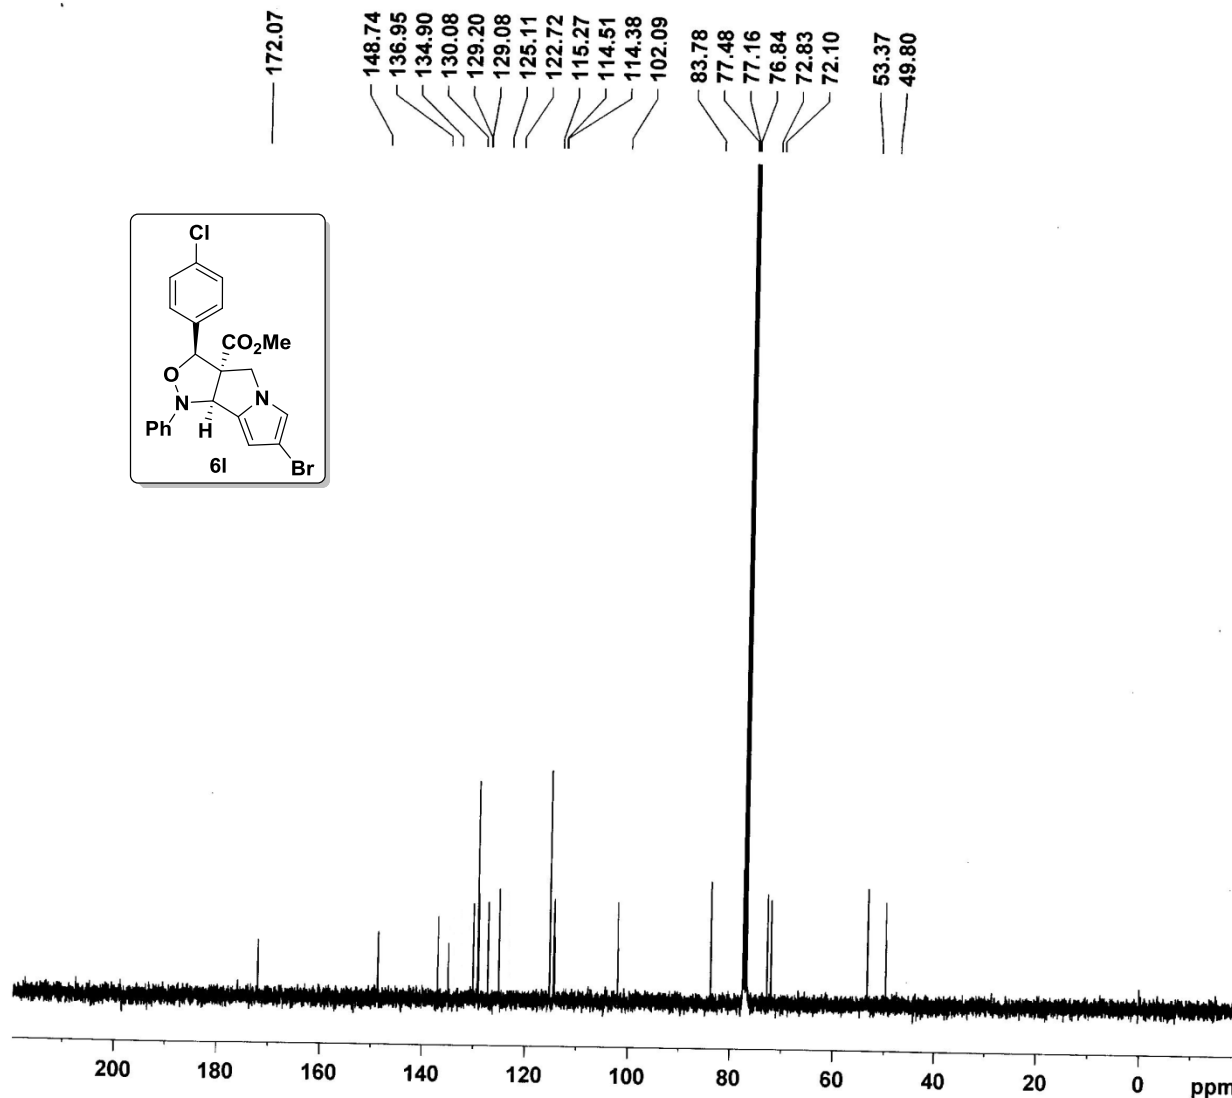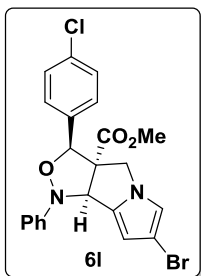

Current Data Parameters  
NAME VA-JS-08-1  
EXPNO 3  
PROCNO 1

F2 - Acquisition Parameters  
Date\_ 20150707  
Time\_ 14.41  
INSTRUM spect  
PROBHD 5 mm DUL 13C-1  
PULPROG zgpg30  
TD 65536  
SOLVENT CDC13  
NS 256  
DS 4  
SWH 24038.461 Hz  
FIDRES 0.366798 Hz  
AQ 1.3631988 sec  
RG 57  
DW 20.800 usec  
DE 6.00 usec  
TE 297.4 K  
D1 2.00000000 sec  
d11 0.03000000 sec  
DELTA 1.89999998 sec  
TD0 1

==== CHANNEL f1 =====  
NUC1 13C  
P1 9.15 usec  
PL1 0.00 dB  
SFO1 100.6228298 MHz

==== CHANNEL f2 =====  
CPDPRG2 waltz16  
NUC2 1H  
PCPD2 90.00 usec  
PL12 14.90 dB  
PL13 14.90 dB  
PL2 -3.00 dB  
SFO2 400.1316005 MHz

F2 - Processing parameters  
SI 32768  
SF 100.6127540 MHz  
WDW EM  
SSB 0  
LB 1.00 Hz  
GB 0  
PC 1.40

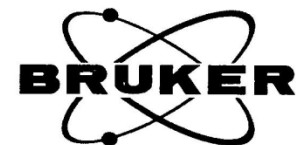

Current Data Parameters  
NAME JSNA-01  
EXPNO 1  
PROCNO 1

F2 - Acquisition Parameters  
Date 20121208  
Time 18.29  
INSTRUM spect  
PROBHD 5 mm DUL 13C-1  
PULPROG zg30  
TD 65536  
SOLVENT CDCl3  
NS 16  
DS 2  
SWH 6172.839 Hz  
FIDRES 0.094190 Hz  
AQ 5.3084660 sec  
RG 143.7  
DW 81.000 usec  
DE 6.00 usec  
TE 300.0 K  
D1 1.00000000 sec  
TDO 1

==== CHANNEL f1 =====  
NUC1 1H  
P1 13.15 usec  
PL1 0.00 dB  
SFO1 300.1318534 MHz

F2 - Processing parameters  
SI 32768  
SF 300.1300058 MHz  
WDW EM  
SSB 0  
LB 0.30 Hz  
GB 0  
PC 1.00

9.452  
7.695  
7.684  
7.671  
7.641  
7.452  
7.441  
7.375  
7.366  
7.355  
7.314  
7.287  
7.275  
7.263  
7.144  
7.118  
  
4.095  
4.074  
3.519  
  
2.390

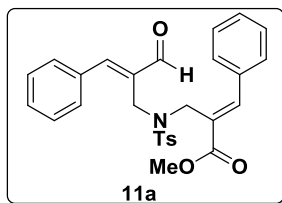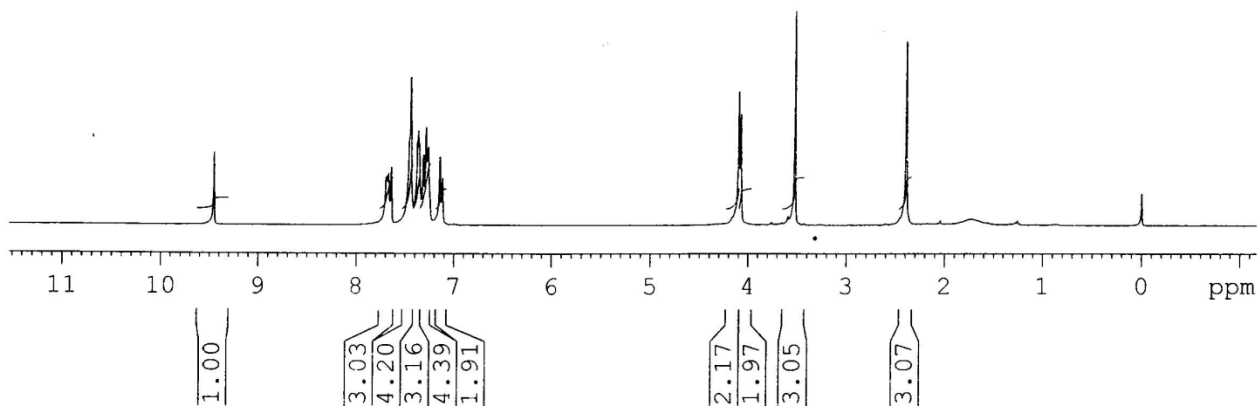

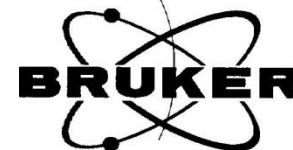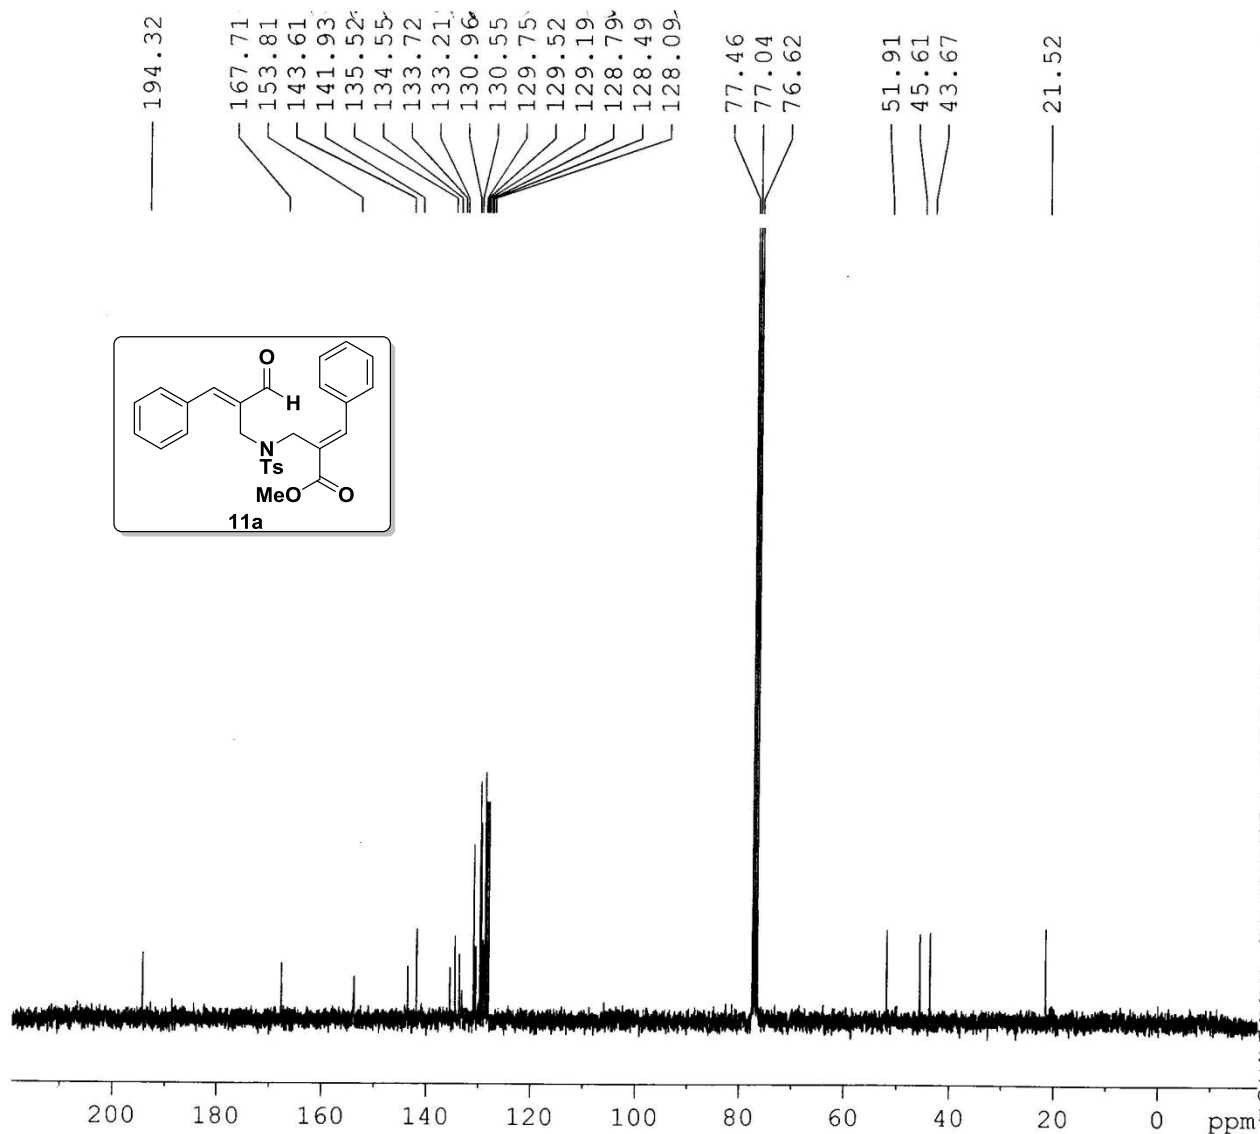

Current Data Parameters  
NAME JSNA-01  
EXPNO 2  
PROCNO 1

F2 - Acquisition Parameters  
Date 20121208  
Time 18.34  
INSTRUM spect  
PROBHD 5 mm DUL 13C-1  
PULPROG zgpg30  
TD 65536  
SOLVENT CDCl3  
NS 182  
DS 4  
SWH 17985.611 Hz  
FIDRES 0.274439 Hz  
AQ 1.8219508 sec  
RG 512  
DW 27.800 usec  
DE 6.00 usec  
TE 300.0 K  
D1 2.00000000 sec  
d11 0.03000000 sec  
DELTA 1.89999998 sec  
TDO 1

=====  
CHANNEL f1  
NUC1 13C  
P1 9.30 usec  
PL1 0.00 dB  
SFO1 75.4752953 MHz

=====  
CHANNEL f2  
CPDPRG2 waltz16  
NUC2 1H  
PCPD2 80.00 usec  
PL2 0.00 dB  
PL12 15.68 dB  
PL13 16.00 dB  
SFO2 300.1312005 MHz

F2 - Processing parameters  
SI 32768  
SF 75.4677490 MHz  
WDW EM  
SSB 0  
LB 1.00 Hz  
GB 0  
PC 1.40

PROTON CDC13 {D:\MB} KOPAL 1

7.595  
7.586  
7.565  
7.500  
7.480  
7.355  
7.347  
7.341  
7.324  
7.321  
7.315  
7.304  
7.298  
7.230  
7.213  
7.197  
7.192  
7.183  
7.175  
7.167  
7.149  
7.101  
7.083  
7.056  
7.037  
4.097  
4.021  
4.017  
3.411  
3.364  
2.372

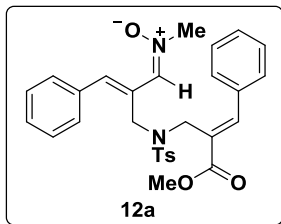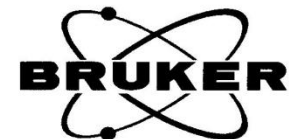

Current Data Parameters  
NAME VA-JS-RSC-22  
EXPNO 3  
PROCNO 1

F2 - Acquisition Parameters  
Date\_ 20150720  
Time\_ 14.20  
INSTRUM spect  
PROBHD 5 mm DUL 13C-1  
PULPROG zg30  
TD 65536  
SOLVENT CDC13  
NS 16  
DS 2  
SWH 8223.685 Hz  
FIDRES 0.125483 Hz  
AQ 3.9846387 sec  
RG 203  
DW 60.800 usec  
DE 6.00 usec  
TE 295.8 K  
D1 1.00000000 sec  
TD0 1

==== CHANNEL f1 =====  
NUC1 1H  
P1 11.42 usec  
PL1 -3.00 dB  
SFO1 400.1324710 MHz

F2 - Processing parameters  
SI 32768  
SF 400.1300323 MHz  
WDW EM  
SSB 0  
LB 0.30 Hz  
GB 0  
PC 1.00

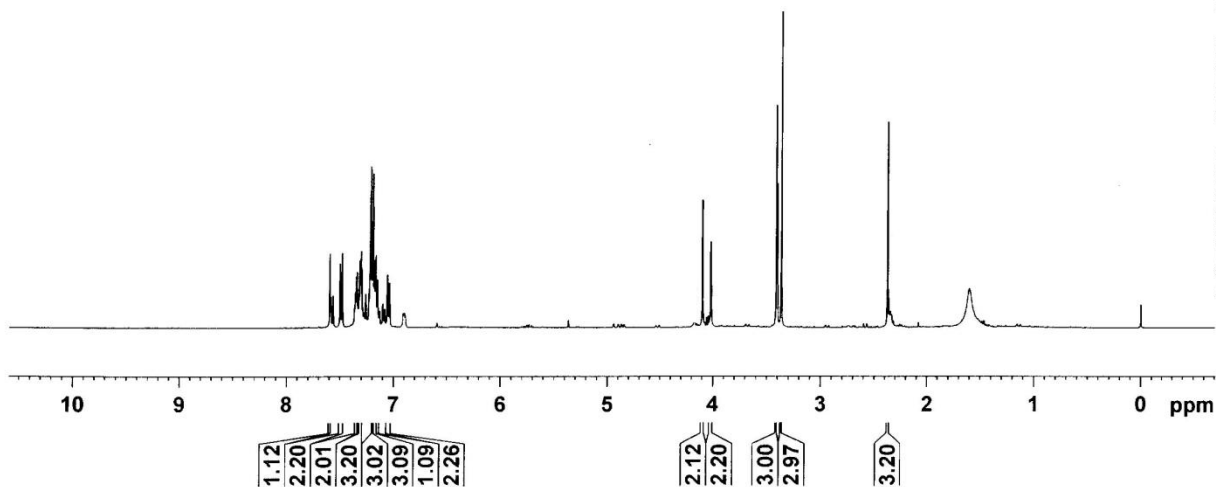

C13CPD CDC13 {D:\MB} KOPAL 1

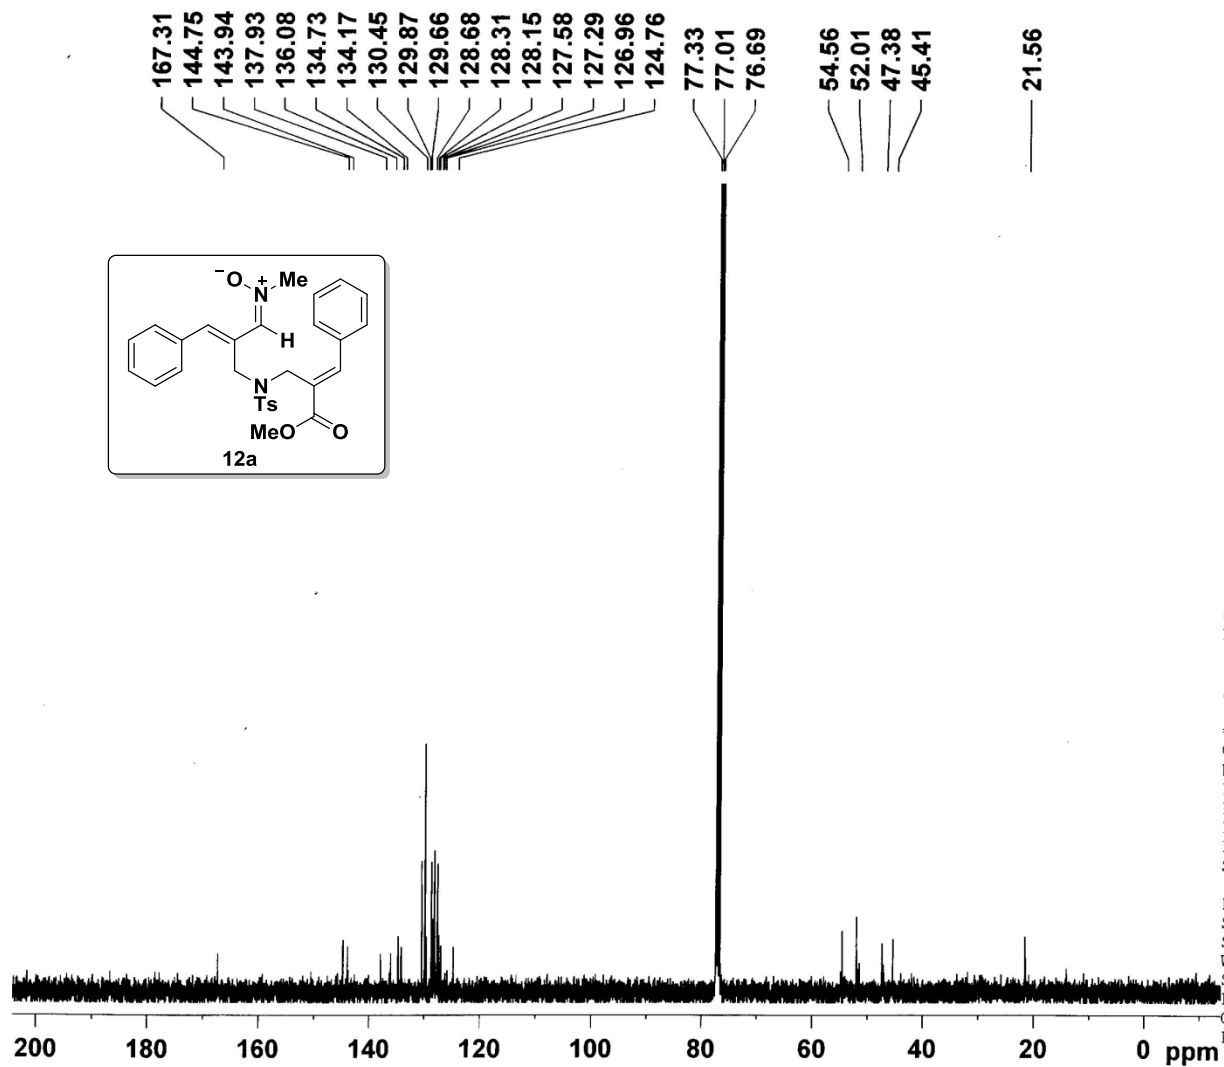

Current Data Parameters  
NAME VA-JS-RSC-22  
EXPNO 4  
PROCNO 1

F2 - Acquisition Parameters  
Date\_ 20150720  
Time\_ 14.27  
INSTRUM spect  
PROBHD 5 mm DUL 13C-1  
PULPROG zgpg30  
TD 65536  
SOLVENT CDC13  
NS 512  
DS 4  
SWH 24038.461 Hz  
FIDRES 0.366798 Hz  
AQ 1.3631988 sec  
RG 40.3  
DW 20.800 usec  
DE 6.00 usec  
TE 296.7 K  
D1 2.00000000 sec  
d11 0.03000000 sec  
DELTA 1.89999998 sec  
TD0 1

=====  
CHANNEL f1  
NUC1 13C  
P1 9.15 usec  
PL1 0.00 dB  
SFO1 100.6228298 MHz

=====  
CHANNEL f2  
CPDPRG2 waltz16  
NUC2 1H  
PCPD2 90.00 usec  
PL12 14.90 dB  
PL13 14.90 dB  
PL2 -3.00 dB  
SFO2 400.1316005 MHz

F2 - Processing parameters  
SI 32768  
SF 100.6127690 MHz  
WDW EM  
SSB 0  
LB  
GB  
PC

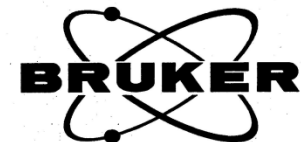

Current Data Parameters  
NAME JS-IV-48  
EXPNO 1  
PROCNO 1

F2 - Acquisition Parameters

Date\_ 20121216  
Time\_ 23.13  
INSTRUM spect  
PROBHD 5 mm DUL 13C-1  
PULPROG zg30  
TD 65536  
SOLVENT CDCl3  
NS 16  
DS 2  
SWH 6172.839 Hz  
FIDRES 0.094190 Hz  
AQ 5.3084660 sec  
RG 362  
DW 81.000 usec  
DE 6.00 usec  
TE 300.0 K  
D1 1.00000000 sec  
TD0 1

===== CHANNEL f1 =====

NUC1 1H  
P1 13.15 usec  
PL1 0.00 dB  
SFO1 300.1318534 MHz

F2 - Processing parameters

SI 32768  
SF 300.1300063 MHz  
WDW EM  
SSB 0  
LB 0.30 Hz  
GB 0  
PC 1.00

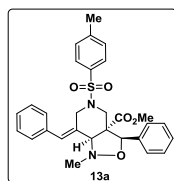

7.423  
7.398  
7.381  
7.357  
7.305  
7.262  
7.231  
6.662  
5.437  
4.621  
4.579  
4.006  
3.824  
3.642  
3.602  
3.027  
2.986  
2.813  
2.670  
2.629  
2.430

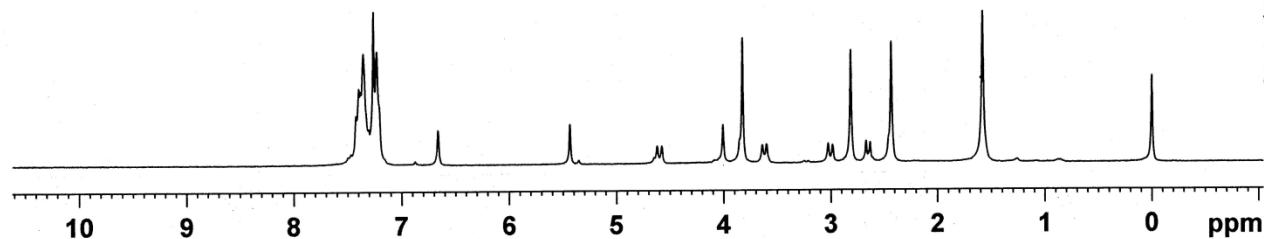

2.13  
6.01  
6.28  
1.04  
1.00  
1.02  
1.12  
3.03  
1.19  
1.07  
3.07  
1.16  
3.06

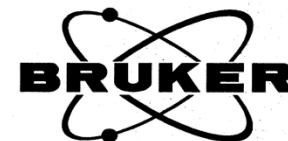

Current Data Parameters  
NAME JS-IV-48  
EXPNO 3  
PROCNO 1

F2 - Acquisition Parameters  
Date\_ 20121217  
Time\_ 8.52  
INSTRUM spect  
PROBHD 5 mm DUL 13C-1  
PULPROG zgpg30  
TD 65536  
SOLVENT CDCl3  
NS 3000  
DS 4  
SWH 17985.611 Hz  
FIDRES 0.274439 Hz  
AQ 1.8219508 sec  
RG 645.1  
DW 27.800 usec  
DE 6.00 usec  
TE 300.0 K  
D1 2.00000000 sec  
d11 0.03000000 sec  
DELTA 1.89999998 sec  
TDO 1

===== CHANNEL f1 =====  
NUC1 13C  
P1 9.30 usec  
PL1 0.00 dB  
SFO1 75.4752953 MHz

===== CHANNEL f2 =====  
CPDPRG2 waltz16  
NUC2 1H  
PCPD2 80.00 usec  
PL2 0.00 dB  
PL12 15.68 dB  
PL13 16.00 dB  
SFO2 300.1312005 MHz

F2 - Processing parameters  
SI 32768  
SF 75.4677490 MHz  
WDW EM  
SSB 0  
LB 1.00 Hz  
GB 0  
PC 1.40

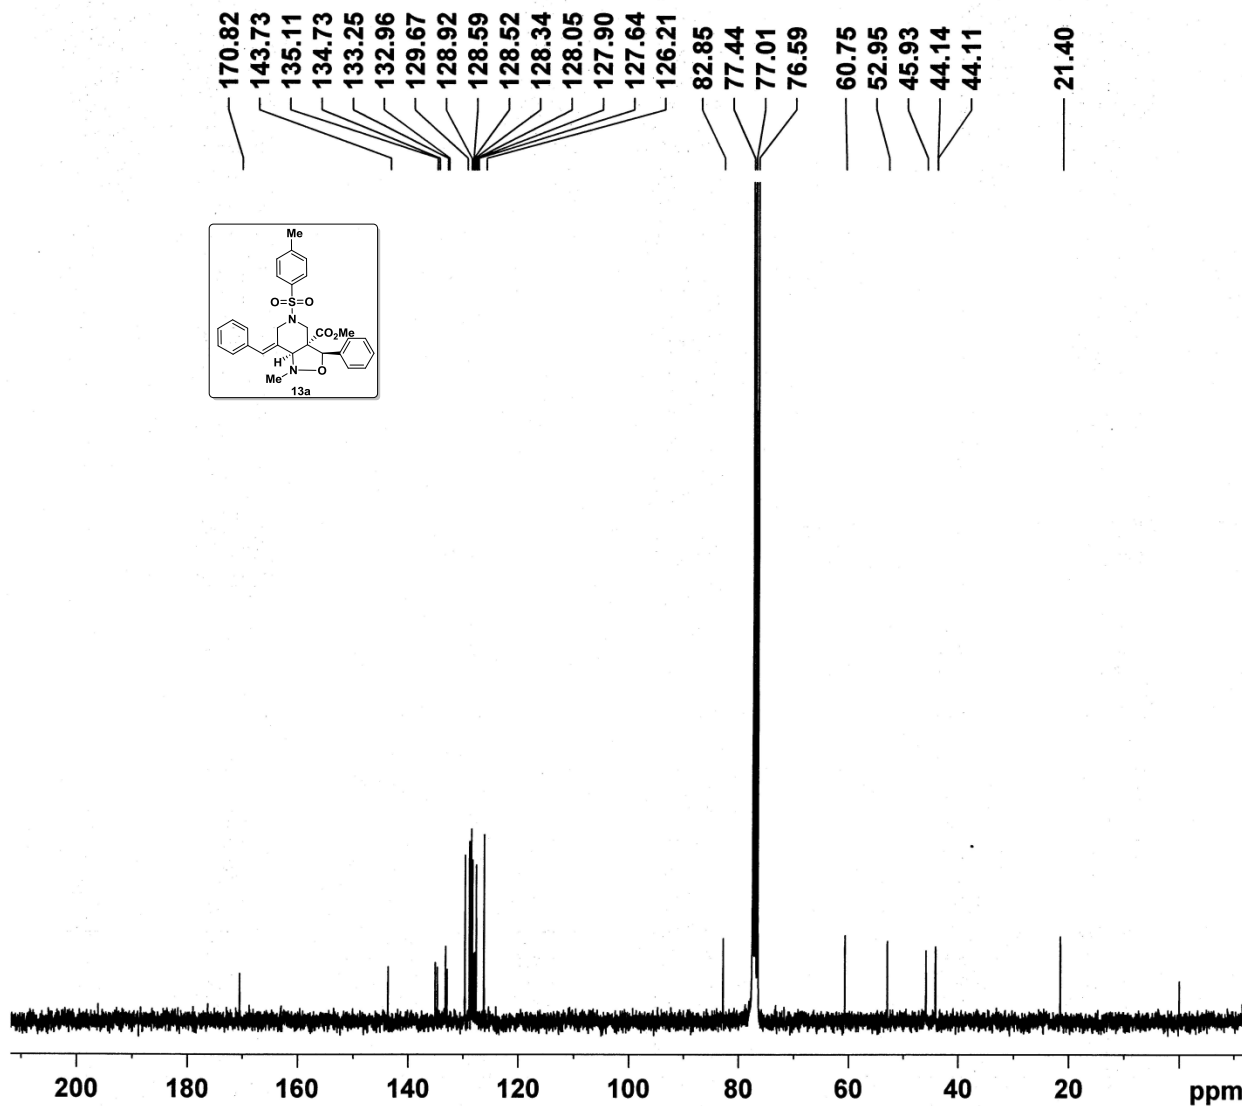

7.451  
7.424  
7.401  
7.378  
7.353  
7.323  
7.298  
7.271  
7.261  
7.245  
7.224  
7.200  
7.168  
7.141  
7.120  
7.101  
7.075  
6.645  
5.410  
4.655  
4.616  
4.575  
4.010  
3.802  
3.669  
3.630  
3.044  
3.002  
2.812  
2.704  
2.664  
2.435  
2.392

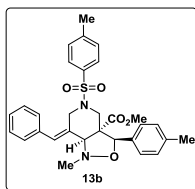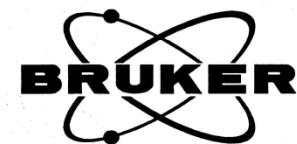

Current Data Parameters  
NAME JS-IV-64  
EXPNO 2  
PROCNO 1

F2 - Acquisition Parameters  
Date\_ 20130212  
Time\_ 22.38  
INSTRUM spect  
PROBHD 5 mm DUL 13C-1  
PULPROG zg30  
TD 65536  
SOLVENT CDCl3  
NS 16  
DS 2  
SWH 6172.839 Hz  
FIDRES 0.094190 Hz  
AQ 5.3084660 sec  
RG 203.2  
DW 81.000 usec  
DE 6.00 usec  
TE 300.0 K  
D1 1.00000000 sec  
TD0 1

===== CHANNEL f1 =====  
NUC1 1H  
P1 13.15 usec  
PL1 0.00 dB  
SFO1 300.1318534 MHz

F2 - Processing parameters  
SI 32768  
SF 300.1300066 MHz  
WDW EM  
SSB 0  
LB 0.30 Hz  
GB 0  
PC 1.00

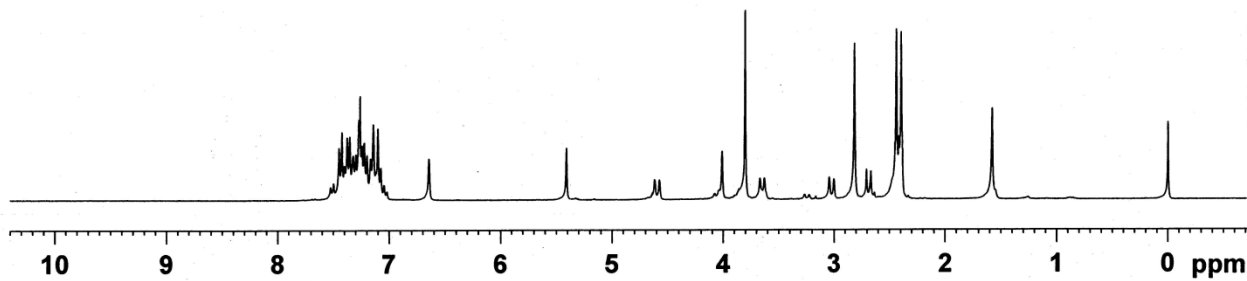

2.14  
2.34  
1.16  
1.01  
1.24  
1.02  
2.03  
2.24  
1.23  
1.12  
1.02  
1.06  
0.98  
3.00  
1.10  
1.06  
3.08  
1.13  
3.13  
3.13



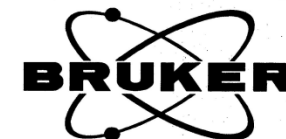

Current Data Parameters  
NAME JS-IV-64  
EXPNO 3  
PROCNO 1

F2 - Acquisition Parameters  
Date\_ 20130212  
Time 23.34  
INSTRUM spect  
PROBHD 5 mm DUL 13C-1  
PULPROG zgpg30  
TD 65536  
SOLVENT CDCl3  
NS 851  
DS 4  
SWH 17985.611 Hz  
FIDRES 0.274439 Hz  
AQ 1.8219508 sec  
RG 1290.2  
DW 27.800 usec  
DE 6.00 usec  
TE 300.0 K  
D1 2.00000000 sec  
d11 0.03000000 sec  
DELTA 1.89999998 sec  
TD0 1

=====  
CHANNEL f1  
NUC1 13C  
P1 9.30 usec  
PL1 0.00 dB  
SFO1 75.4752953 MHz

=====  
CHANNEL f2  
CPDPRG2 waltz16  
NUC2 1H  
PCPD2 80.00 usec  
PL2 0.00 dB  
PL12 15.68 dB  
PL13 16.00 dB  
SFO2 300.1312005 MHz

F2 - Processing parameters  
SI 32768  
SF 75.4677490 MHz  
WDW EM  
SSB 0  
LB 1.00 Hz  
GB 0  
PC 1.40

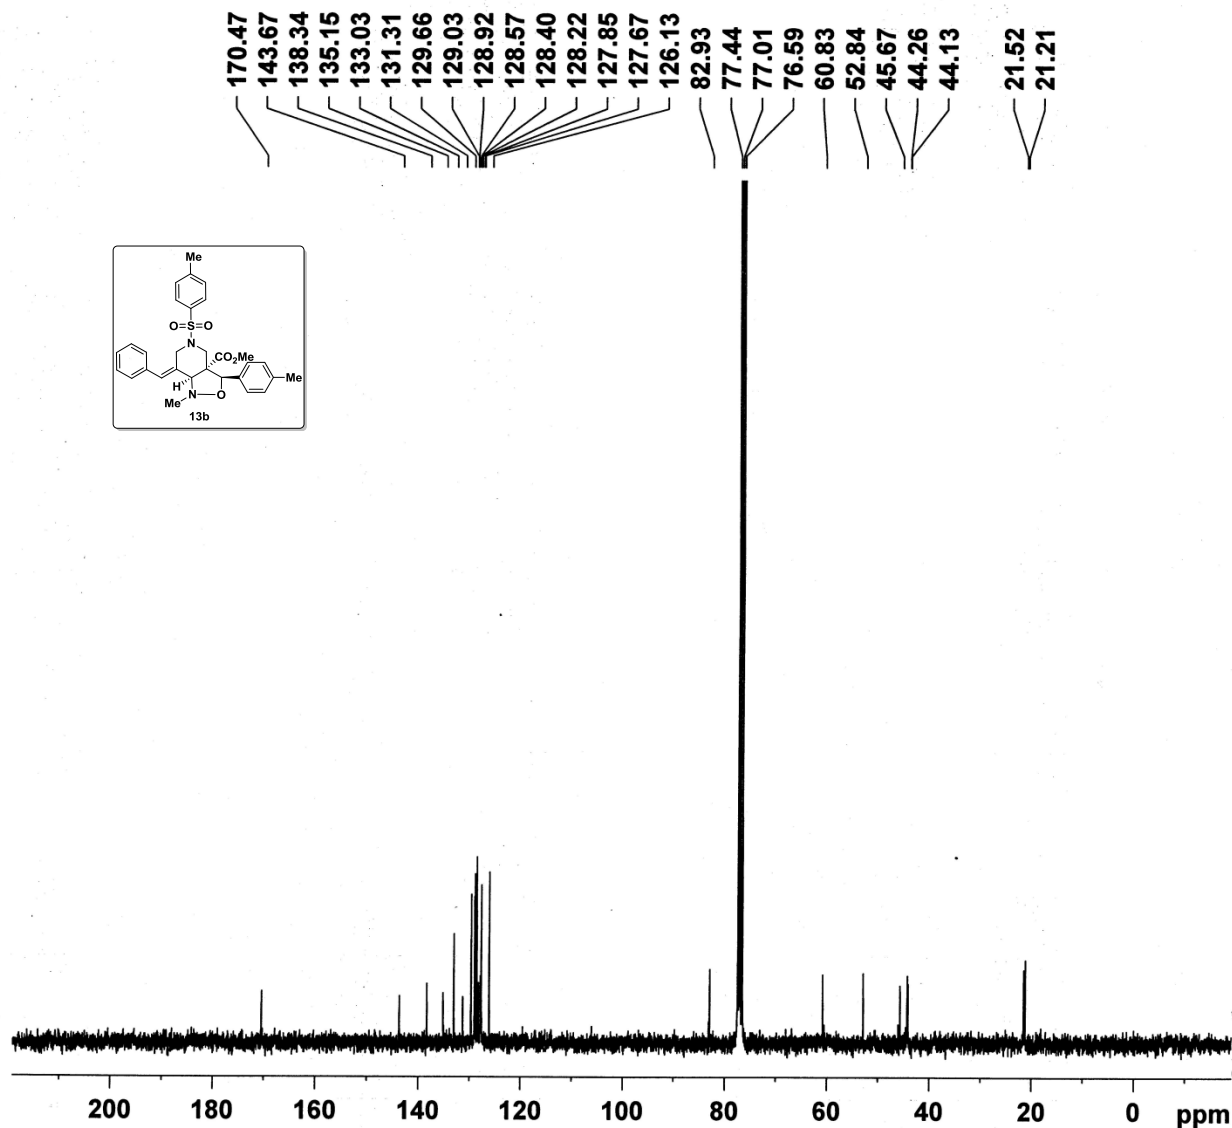

7.452  
7.425  
7.400  
7.376  
7.353  
7.320  
7.296  
7.263  
7.241  
7.221  
7.196  
7.167  
7.140  
7.124  
7.098  
6.635  
5.431  
4.556  
4.244  
4.223  
4.201  
3.988  
3.626  
3.003  
2.962  
2.806  
2.687  
2.648  
2.433  
2.393  
1.681  
1.658  
1.634  
1.415  
1.391  
1.366  
0.940  
0.916  
0.892

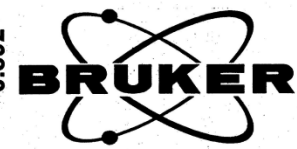

Current Data Parameters  
NAME JSBHNTS-13  
EXPNO 2  
PROCNO 1

F2 - Acquisition Parameters  
Date\_ 20130514  
Time 20.03  
INSTRUM spect  
PROBHD 5 mm DUL 13C-1  
PULPROG zg30  
TD 65536  
SOLVENT CDC13  
NS 16  
DS 2  
SWH 6172.839 Hz  
FIDRES 0.094190 Hz  
AQ 5.3084660 sec  
RG 256  
DW 81.000 usec  
DE 6.00 usec  
TE 300.0 K  
D1 1.00000000 sec  
TD0 1

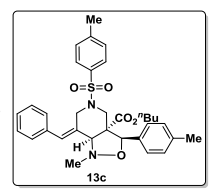

===== CHANNEL f1 =====  
NUC1 1H  
P1 13.15 usec  
PL1 0.00 dB  
SFO1 300.1318534 MHz

F2 - Processing parameters  
SI 32768  
SF 300.1300069 MHz  
WDW EM  
SSB 0  
LB 0.30 Hz  
GB 0  
PC 1.00

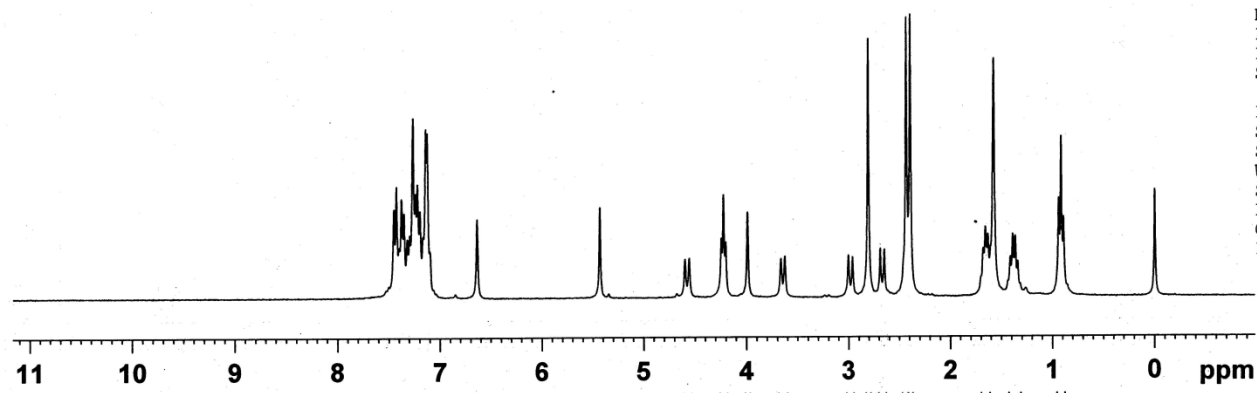

2.10  
2.10  
1.82  
3.11  
4.04  
0.85  
0.89  
0.89  
1.89  
0.90  
0.97  
0.89  
2.59  
0.99  
2.99  
3.00  
2.15  
2.12  
3.00

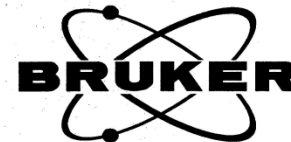

Current Data Parameters  
NAME JSBHNTS-13  
EXPNO 3  
PROCNO 1

F2 - Acquisition Parameters  
Date\_ 20130514  
Time 20.10  
INSTRUM spect  
PROBHD 5 mm DUL 13C-1  
PULPROG zgpg30  
TD 65536  
SOLVENT CDCl3  
NS 681  
DS 4  
SWH 17985.611 Hz  
FIDRES 0.274439 Hz  
AQ 1.8219508 sec  
RG 1625.5  
DW 27.800 usec  
DE 6.00 usec  
TE 300.0 K  
D1 2.00000000 sec  
d11 0.03000000 sec  
DELTA 1.89999998 sec  
TDO 1

==== CHANNEL f1 =====  
NUC1 13C  
P1 9.30 usec  
PL1 0.00 dB  
SFO1 75.4752953 MHz

==== CHANNEL f2 =====  
CPDPRG2 waltz16  
NUC2 1H  
PCPD2 80.00 usec  
PL2 0.00 dB  
PL12 15.68 dB  
PL13 16.00 dB  
SFO2 300.1312005 MHz

F2 - Processing parameters  
SI 32768  
SF 75.4677490 MHz  
WDW EM  
SSB 0  
LB 1.00 Hz  
GB 0  
PC 1.40

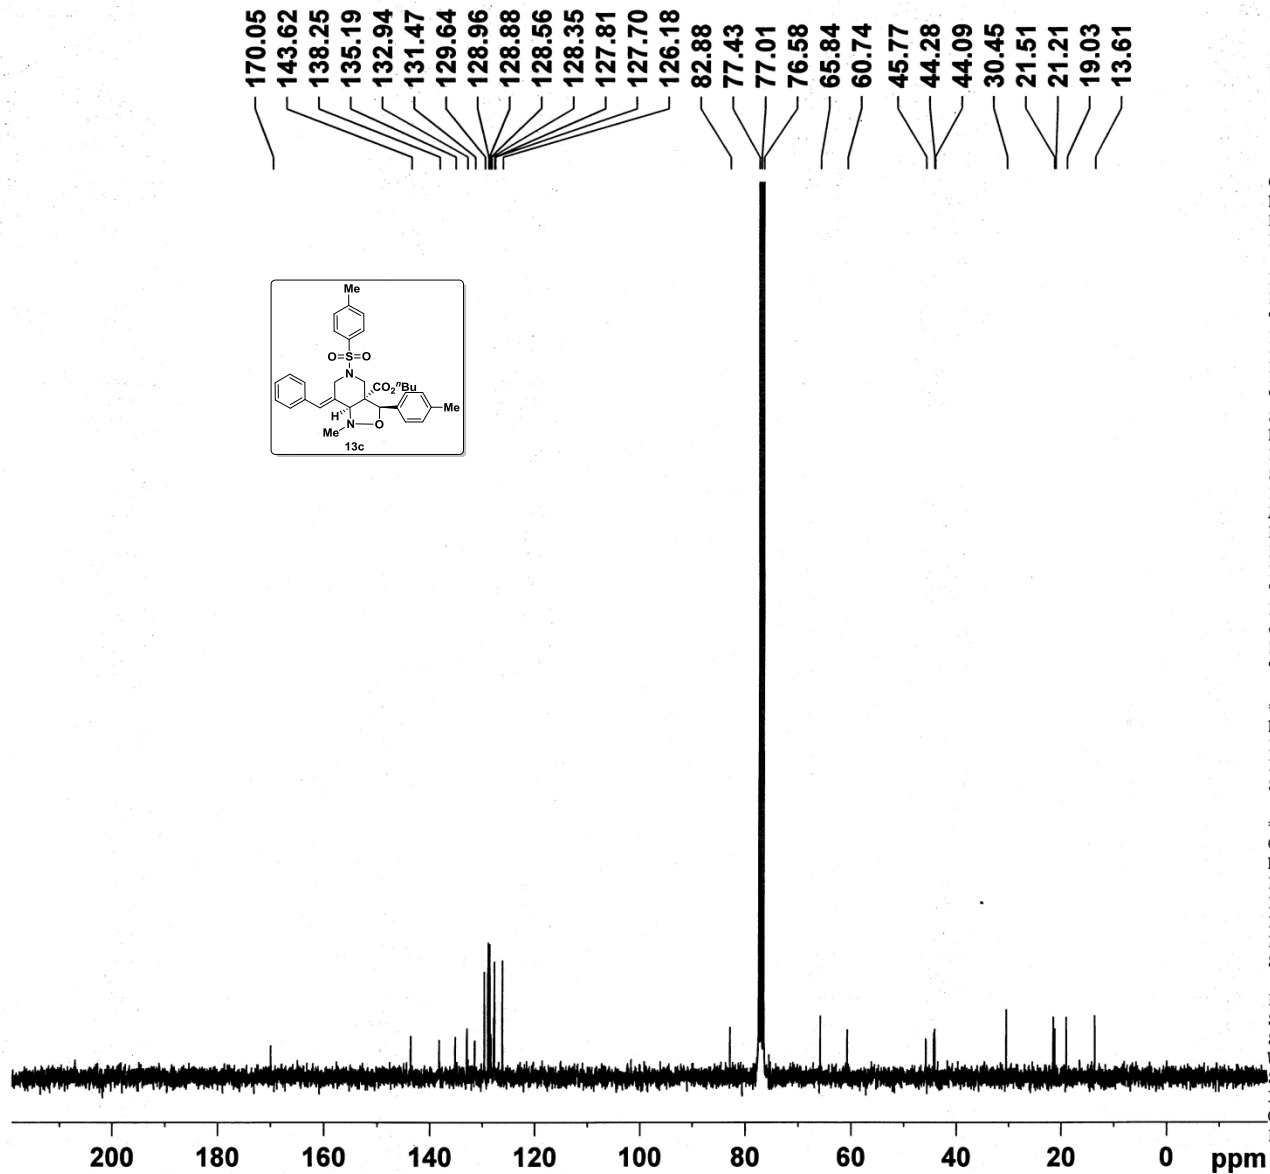

7.439  
7.412  
7.378  
7.354  
7.320  
7.298  
7.260  
7.221  
7.192  
7.167  
7.141  
6.641  
5.427  
4.601  
4.559  
4.252  
4.230  
4.208  
3.978  
3.693  
3.654  
3.001  
2.959  
2.948  
2.801  
2.685  
2.645  
2.430  
1.684  
1.660  
1.637  
1.409  
1.385  
1.360  
1.307  
1.284  
0.938  
0.914  
0.889

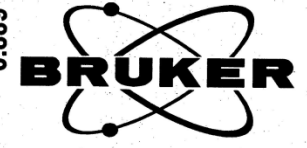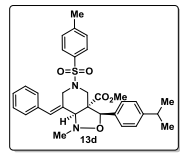

Current Data Parameters  
NAME JSBHNTS-21  
EXPNO 1  
PROCNO 1

F2 - Acquisition Parameters  
Date\_ 20130518  
Time\_ 17.16  
INSTRUM spect  
PROBHD 5 mm DUL 13C-1  
PULPROG zg30  
TD 65536  
SOLVENT CDC13  
NS 16  
DS 2  
SWH 6172.839 Hz  
FIDRES 0.094190 Hz  
AQ 5.3084660 sec  
RG 203.2  
DW 81.000 usec  
DE 6.00 usec  
TE 300.0 K  
D1 1.00000000 sec  
TD0 1

===== CHANNEL f1 =====  
NUC1 1H  
P1 13.15 usec  
PL1 0.00 dB  
SFO1 300.1318534 MHz

F2 - Processing parameters  
SI 32768  
SF 300.1300067 MHz  
WDW EM  
SSB 0  
LB 0.30 Hz  
GB 0  
PC 1.00

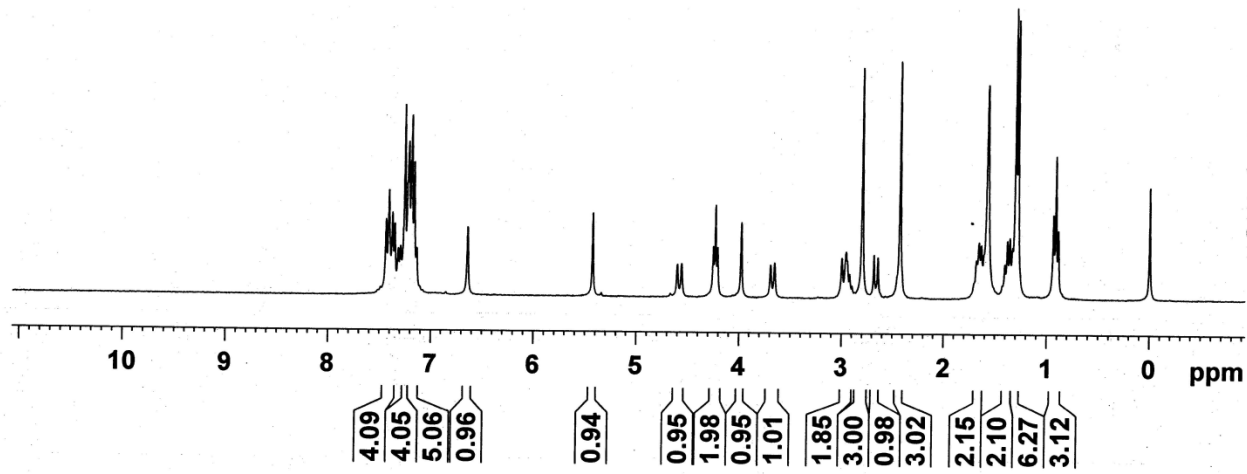

10 9 8 7 6 5 4 3 2 1 0 ppm

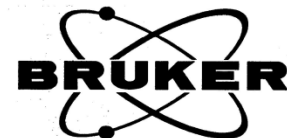

Current Data Parameters  
NAME JSBHNTS-21  
EXPNO 2  
PROCNO 1

F2 - Acquisition Parameters  
Date\_ 20130518  
Time\_ 17.35  
INSTRUM spect  
PROBHD 5 mm DUL 13C-1  
PULPROG zgpg30  
TD 65536  
SOLVENT CDCl3  
NS 667  
DS 4  
SWH 17985.611 Hz  
FIDRES 0.274439 Hz  
AQ 1.8219508 sec  
RG 2580.3  
DW 27.800 usec  
DE 6.00 usec  
TE 300.0 K  
D1 2.00000000 sec  
d11 0.03000000 sec  
DELTA 1.89999998 sec  
TD0 1

===== CHANNEL f1 =====  
NUC1 13C  
P1 9.30 usec  
PL1 0.00 dB  
SFO1 75.4752953 MHz

===== CHANNEL f2 =====  
CPDPRG2 waltz16  
NUC2 1H  
PCPD2 80.00 usec  
PL2 0.00 dB  
PL12 15.68 dB  
PL13 16.00 dB  
SFO2 300.1312005 MHz

F2 - Processing parameters  
SI 32768  
SF 75.4677490 MHz  
WDW EM  
SSB 0  
LB 1.00 Hz  
GB 0  
PC 1.40

170.13  
149.22  
143.61  
135.20  
132.98  
131.92  
129.63  
128.89  
128.56  
128.34  
127.82  
127.68  
126.31  
82.85  
77.43  
77.00  
76.58  
65.83  
60.72  
45.93  
44.19  
33.90  
30.46  
24.00  
23.95  
21.51  
19.04  
13.62

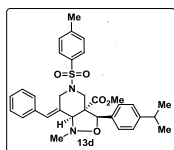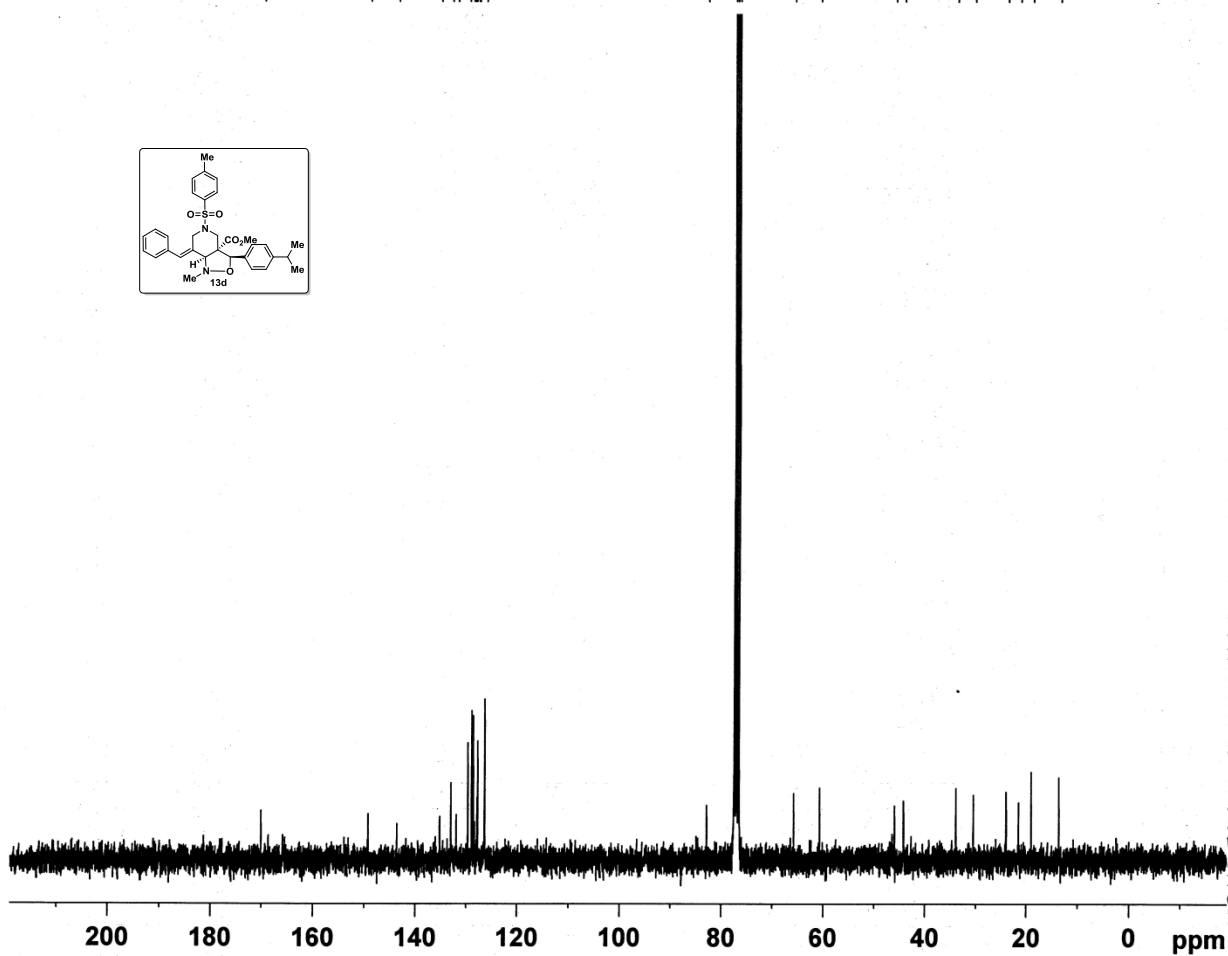

7.484  
7.455  
7.428  
7.402  
7.395  
7.371  
7.346  
7.322  
7.299  
7.261  
7.243  
7.194  
7.170  
6.652  
5.773  
4.543  
4.502  
4.289  
4.275  
4.253  
4.147  
4.125  
4.111  
4.103  
4.089  
3.989  
3.657  
3.619  
2.986  
2.945  
2.778  
2.674  
2.635  
2.438  
2.410  
1.688  
1.665  
1.638  
1.616  
1.560  
1.423  
1.398  
1.373  
1.347  
0.937  
0.912  
0.888

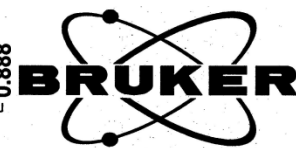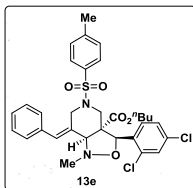

Current Data Parameters  
NAME JSBHNTS-28  
EXPNO 6  
PROCNO 1

F2 - Acquisition Parameters  
Date\_ 20131120  
Time 0.44  
INSTRUM spect  
PROBHD 5 mm DUL 13C-1  
PULPROG zg30  
TD 65536  
SOLVENT CDC13  
NS 50  
DS 2  
SWH 6172.839 Hz  
FIDRES 0.094190 Hz  
AQ 5.3084660 sec  
RG 456.1  
DW 81.000 use  
DE 6.00 use  
TE 300.0 K  
D1 1.00000000 sec  
TD0 1

==== CHANNEL f1 =====  
NUC1 1H  
P1 13.15 use  
PL1 0.00 dB  
SFO1 300.1318534 MHz

F2 - Processing parameters  
SI 32768  
SF 300.1300065 MHz  
WDW EM  
SSB 0  
LB 0.30 Hz  
GB 0  
PC 1.00

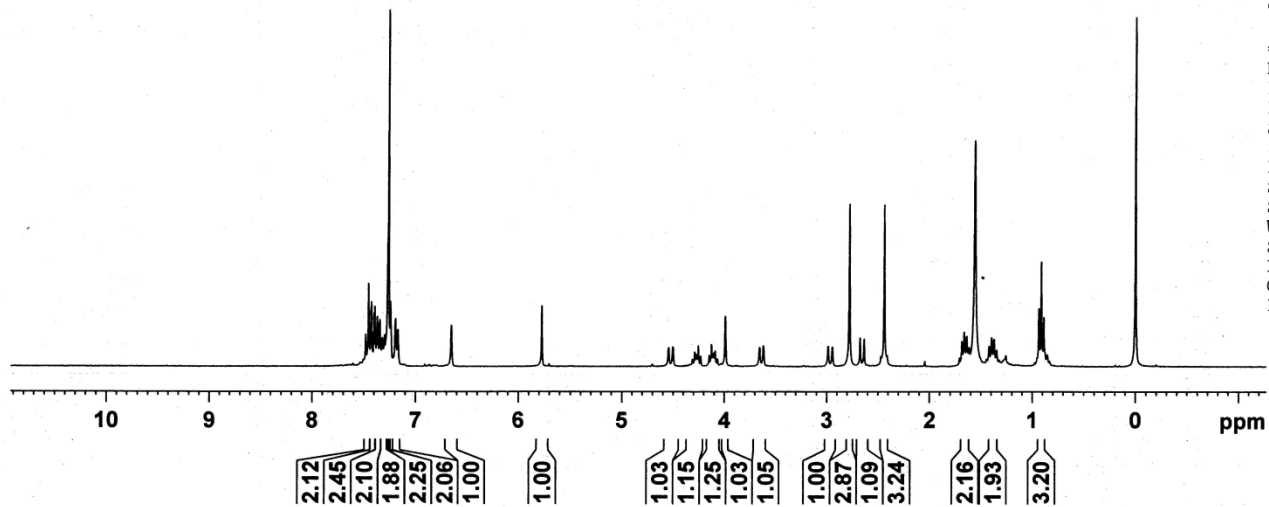

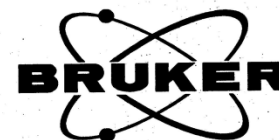

Current Data Parameters  
NAME JSBHNTS-28  
EXPNO 7  
PROCNO 1

F2 - Acquisition Parameters  
Date\_ 20131120  
Time\_ 8.06  
INSTRUM spect  
PROBHD 5 mm DUL 13C-1  
PULPROG zgpg30  
TD 65536  
SOLVENT CDC13  
NS 7072  
DS 4  
SWH 17985.611 Hz  
FIDRES 0.274439 Hz  
AQ 1.8219508 sec  
RG 1290.2  
DW 27.800 usec  
DE 6.00 usec  
TE 300.0 K  
D1 2.00000000 sec  
d11 0.03000000 sec  
DELTA 1.89999998 sec  
TD0 1

===== CHANNEL f1 =====  
NUC1 13C  
P1 9.30 usec  
PL1 0.00 dB  
SFO1 75.4752953 MHz

===== CHANNEL f2 =====  
CPDPRG2 waltz16  
NUC2 1H  
PCPD2 80.00 usec  
PL2 0.00 dB  
PL12 15.68 dB  
PL13 16.00 dB  
SFO2 300.1312005 MHz

F2 - Processing parameters  
SI 32768  
SF 75.4677490 MHz  
WDW EM  
SSB 0  
LB 1.00 Hz  
GB 0  
PC 1.40

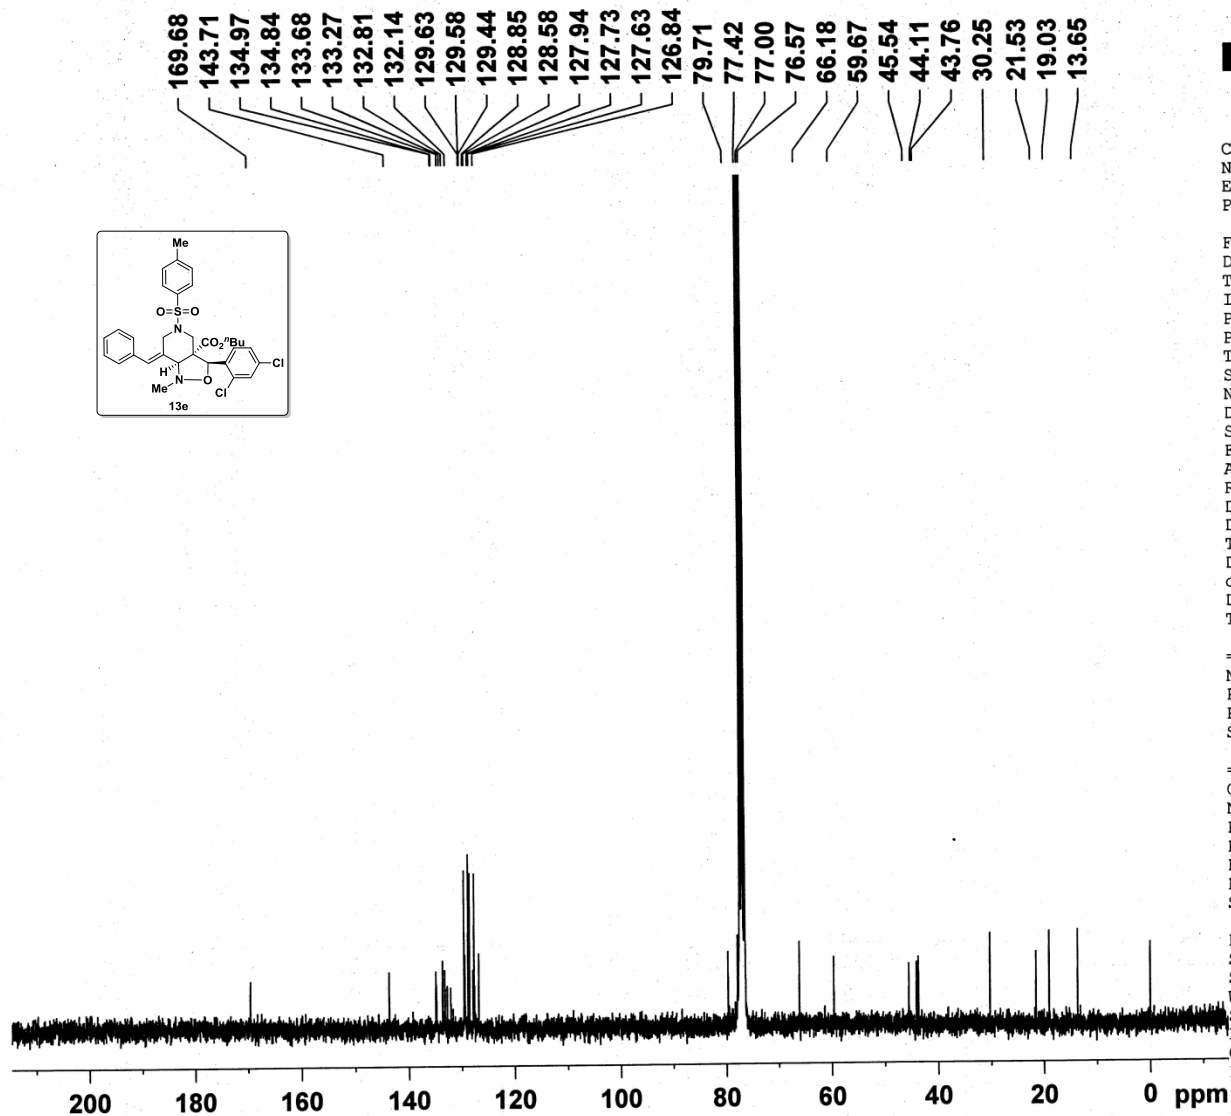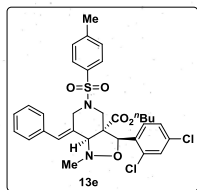

7.480  
7.433  
7.405  
7.380  
7.355  
7.324  
7.300  
7.259  
7.233  
7.222  
7.194  
7.078  
7.050  
7.021  
6.654  
5.426  
4.610  
4.568  
4.259  
4.237  
4.215  
3.955  
3.600  
3.561  
2.994  
2.952  
2.792  
2.612  
2.573  
2.425  
1.715  
1.694  
1.671  
1.644  
1.622  
1.599  
1.452  
1.428  
1.403  
1.378  
1.354  
0.948

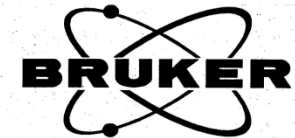

Current Data Parameters  
 NAME JSBHNTS-44  
 EXPNO 1  
 PROCNO 1

F2 - Acquisition Parameters  
 Date\_ 20131120  
 Time\_ 8.32  
 INSTRUM spect  
 PROBHD 5 mm DUL 13C-1  
 PULPROG zg30  
 TD 65536  
 SOLVENT CDC13  
 NS 16  
 DS 2  
 SWH 6172.839 Hz  
 FIDRES 0.094190 Hz  
 AQ 5.3084660 sec  
 RG 90.5  
 DW 81.000 usec  
 DE 6.00 usec  
 TE 300.0 K  
 D1 1.00000000 sec  
 TD0 1

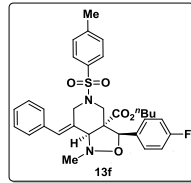

==== CHANNEL f1 =====  
 NUC1 1H  
 P1 13.15 usec  
 PL1 0.00 dB  
 SFO1 300.1318534 MHz

F2 - Processing parameters  
 SI 32768  
 SF 300.1300070 MHz  
 WDW EM  
 SSB 0  
 LB 0.30 Hz  
 GB 0  
 PC 1.00

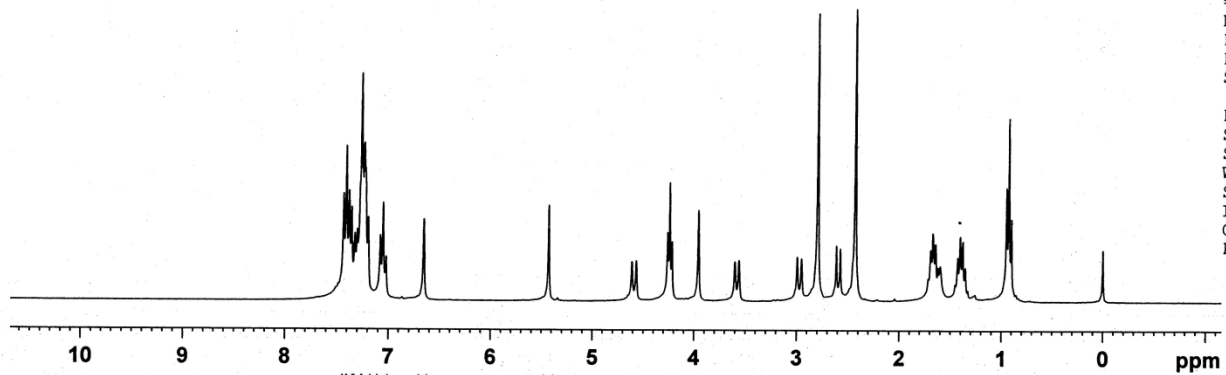

1.97  
2.17  
3.35  
3.98  
2.11  
1.00  
0.99  
1.09  
2.05  
0.99  
1.08  
1.16  
3.00  
1.20  
3.11  
2.06  
2.15  
3.19



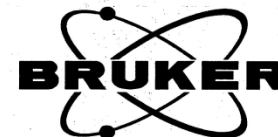

Current Data Parameters  
NAME JSBHNTS-44  
EXPNO 2  
PROCNO 1

F2 - Acquisition Parameters  
Date\_ 20131120  
Time\_ 9.23  
INSTRUM spect  
PROBHD 5 mm DUL 13C-1  
PULPROG zgpg30  
TD 65536  
SOLVENT CDC13  
NS 784  
DS 4  
SWH 17985.611 Hz  
FIDRES 0.274439 Hz  
AQ 1.8219508 sec  
RG 912.3  
DW 27.800 usec  
DE 6.00 usec  
TE 300.0 K  
D1 2.00000000 sec  
d11 0.03000000 sec  
DELTA 1.89999998 sec  
TDO 1

==== CHANNEL f1 =====  
NUC1 13C  
P1 9.30 usec  
PL1 0.00 dB  
SFO1 75.4752953 MHz

==== CHANNEL f2 =====  
CPDPRG2 waltz16  
NUC2 1H  
PCPD2 80.00 usec  
PL2 0.00 dB  
PL12 15.68 dB  
PL13 16.00 dB  
SFO2 300.1312005 MHz

F2 - Processing parameters  
SI 32768  
SF 75.4677490 MHz  
WDW EM  
SSB 0  
LB 1.00 Hz  
GB 0  
PC 1.40

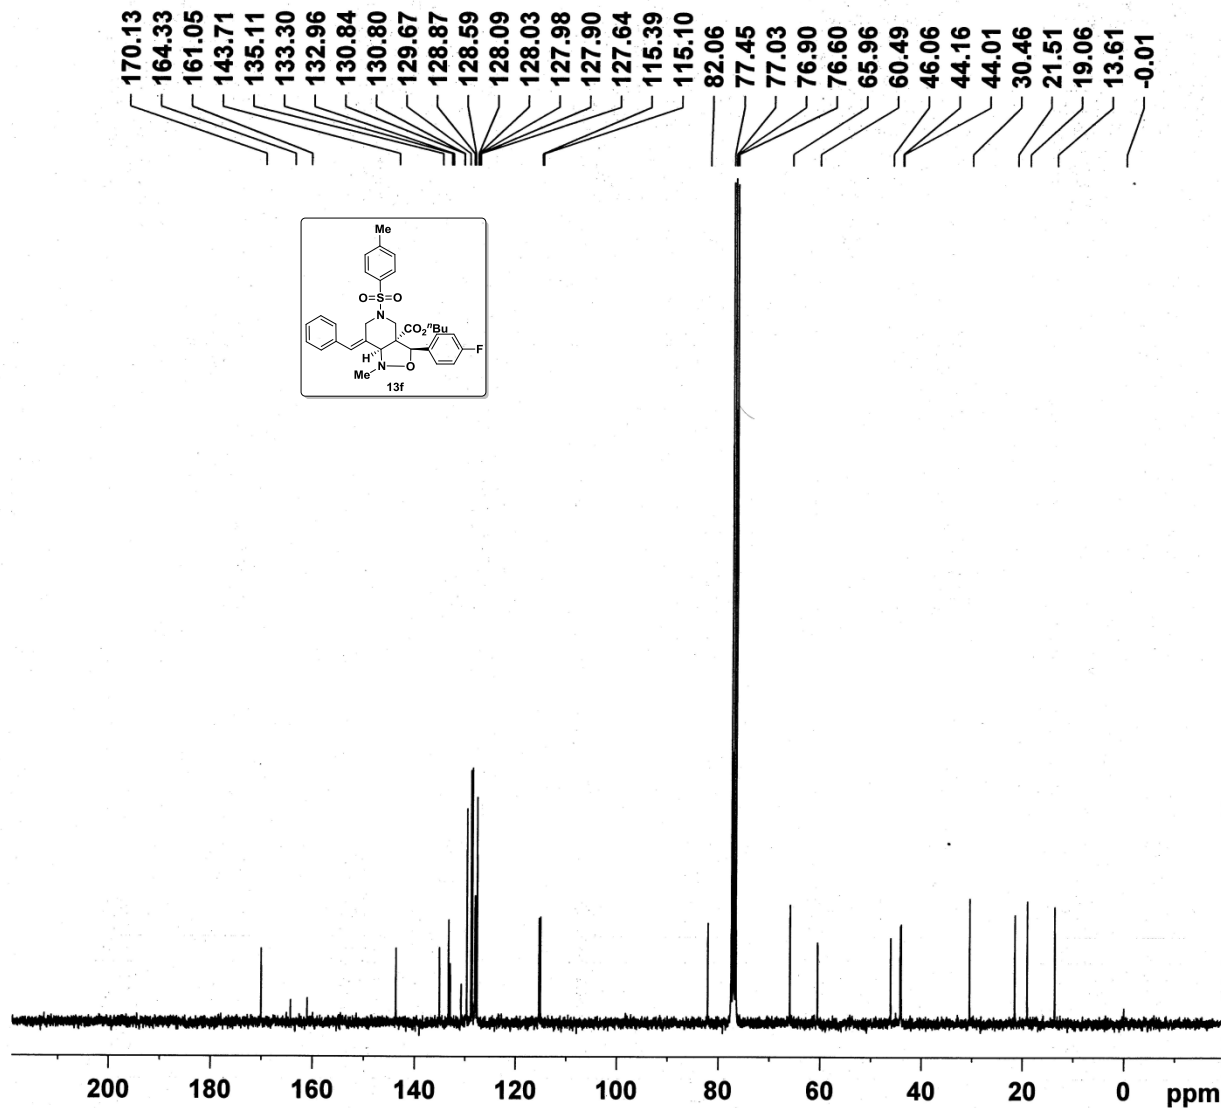

Supplement: c5ra10371a1.pdf [file c5ra10371a1.pdf]
